# Supplementary material for: Co(ii)/Cu(ii)-cocatalyzed oxidative C–H/N–H functionalization of benzamides with ketones: a facile route to isoindolin-1-ones
Source: Royal Society of Chemistry journal article supplement (doi:10.1039/c9cc02661d), 2019-01-01

## *Supplementary Information*

### Co(II)/Cu(II)-cocatalyzed oxidative C–H/N–H functionalization of benzamides with ketones: a facile route to isoindolin-1-ones

Xi Zhou,<sup>a</sup> Hongyan Xu,<sup>a</sup> Qiaodan Yang,<sup>a</sup> Hua Chen,<sup>a</sup> Shoufeng Wang,<sup>b</sup> and Huaiqing Zhao\*<sup>a</sup>

<sup>a</sup>School of Chemistry and Chemical Engineering, University of Jinan, Jinan, Shandong, 250022, P. R. China

<sup>b</sup>Shandong Provincial Key Laboratory of Fluorine Chemistry and Chemical Materials, School of Chemistry and Chemical Engineering, University of Jinan, Jinan 250022, P. R. China

E-mail: chm\_zhaohq@ujn.edu.cn

| <b>Contents</b>                                            | <b>Page</b> |
|------------------------------------------------------------|-------------|
| <b>Number</b>                                              |             |
| 1. General Comments .....                                  | S2          |
| 2. Optimization details for the reaction conditions: ..... | S3          |
| 3. General experimental procedures .....                   | S7          |
| 4. The characterization of products .....                  | S9          |
| 5. Removal of the directing group .....                    | S38         |
| 6. Experimental procedures of mechanistic studies .....    | S40         |
| 7. Reference .....                                         | S48         |
| 8. <sup>1</sup> H and <sup>13</sup> C NMR spectra .....    | S49         |

## 1. General Comments

All other reagents were purchased from TCI, Alfa Aesar, Accela and Adamas used without further purification. DMF and DCE were distilled from CaH<sub>2</sub> under nitrogen and stored under nitrogen. 1,4-Dioxane was distilled from Sodium under nitrogen and stored under nitrogen. <sup>1</sup>H NMR (400 or 600 MHz) and <sup>13</sup>C NMR (101 MHz) were obtained on Bruker spectrometer with CDCl<sub>3</sub> as solvent and tetramethylsilane (TMS) as internal standard. Chemical shifts were reported in units (ppm) by assigning TMS resonance in the <sup>1</sup>H NMR spectra as 0.00 ppm (chloroform, 7.26 ppm). Data were reported as follows: chemical shift, multiplicity (s = singlet, d = doublet, t = triplet and m = multiplet), coupling constant (*J* values) in Hz and integration. Chemical shifts for <sup>13</sup>C NMR spectra were recorded in ppm from tetramethylsilane using the central peak of CDCl<sub>3</sub> (77.00 ppm) as the internal standard. IR-spectra were obtained using the Bruker VERTEX 70 FT-IR spectrometer. The yields reported are the isolated yields.

## 2. Optimization details for the reaction conditions:

**Table S1: Optimization of cobalt salts**

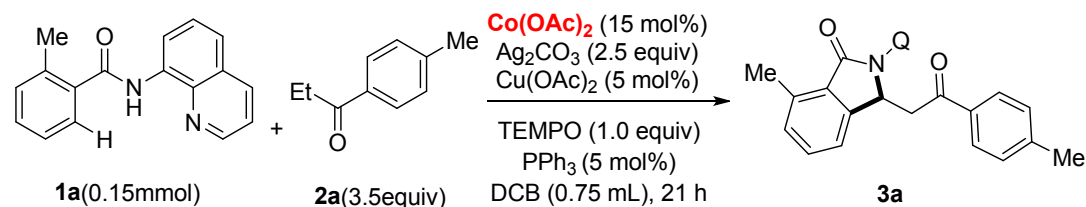

| Entry | Cobalt salts                                          | Yield(%)  |
|-------|-------------------------------------------------------|-----------|
| 1     | <b>Co(OAc)<sub>2</sub></b>                            | <b>76</b> |
| 2     | Co(acac) <sub>2</sub>                                 | 39        |
| 3     | Co(OAc) <sub>2</sub> ·4H <sub>2</sub> O               | 63        |
| 4     | Co(ClO <sub>4</sub> ) <sub>2</sub> ·6H <sub>2</sub> O | 50        |

**Table S2: Optimization of oxidants**

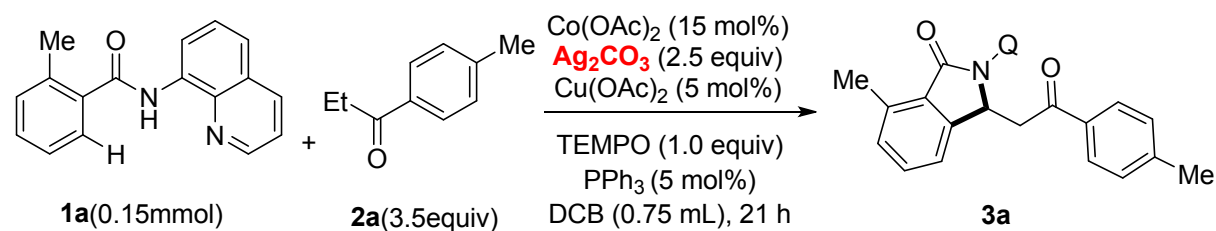

| Entry | Oxidants                            | Yield(%)  |
|-------|-------------------------------------|-----------|
| 1     | <b>Ag<sub>2</sub>CO<sub>3</sub></b> | <b>76</b> |
| 2     | AgOAc                               | 20        |
| 3     | AgNO <sub>3</sub>                   | 32        |
| 4     | Ag <sub>2</sub> O                   | 38        |

|   |                                         |    |
|---|-----------------------------------------|----|
| 5 | Ag <sub>2</sub> SO <sub>4</sub>         | 52 |
| 6 | Mn(OAc) <sub>2</sub> ·4H <sub>2</sub> O | 10 |

**Table S3: Optimization of copper salts**

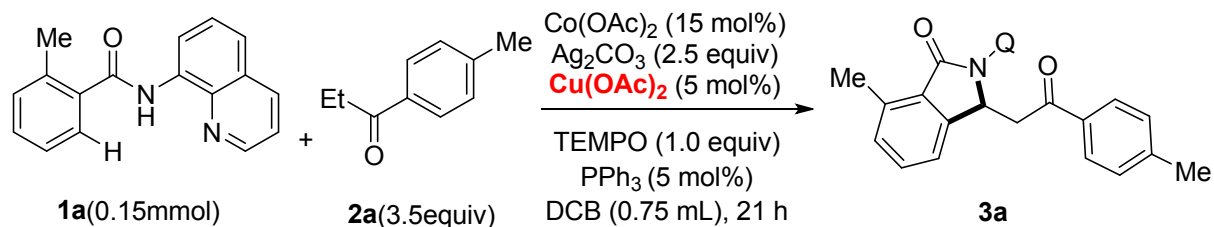

| Entry | Copper salts               | Yield(%)  |
|-------|----------------------------|-----------|
| 1     | <b>Cu(OAc)<sub>2</sub></b> | <b>76</b> |
| 2     | Cu(OTf) <sub>2</sub>       | -         |
| 3     | Cu(TFA) <sub>2</sub>       | -         |

**Table S4: Optimization of the amount of TEMPO**

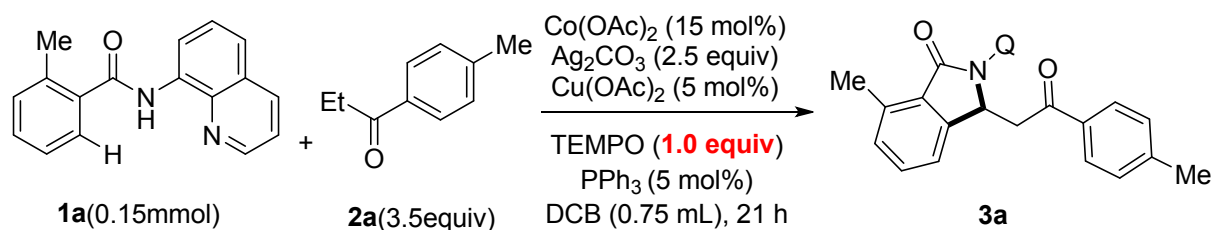

| Entry | Equiv.     | Yield(%)  |
|-------|------------|-----------|
| 1     | 0.8        | 66        |
| 2     | <b>1.0</b> | <b>76</b> |
| 3     | 1.2        | 64        |

**Table S5: Optimization of ligands**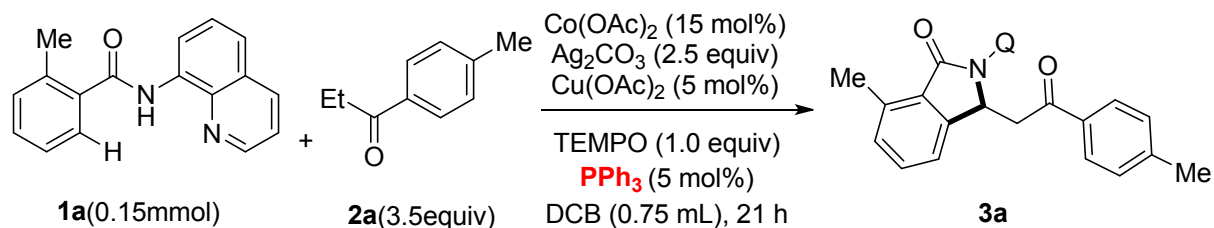

| Entry | Ligands                   | Yield(%) |
|-------|---------------------------|----------|
| 1     | $\text{P(Ph)}_3$          | 76       |
| 2     | 2,2'-Bipyridine           | 51       |
| 3     | 1,10-Phenanthroline       | 47       |
| 4     | $\text{P}(t\text{-Bu})_3$ | 70       |

**Table S6: Optimization of solvents**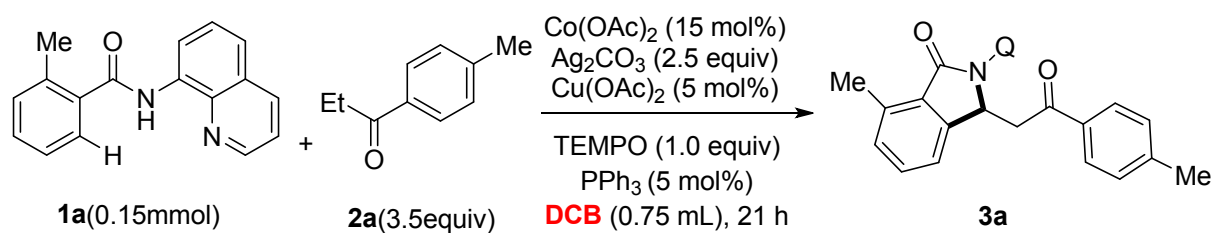

| Entry | Solvents    | Yield(%)  |
|-------|-------------|-----------|
| 1     | <b>DCB</b>  | <b>76</b> |
| 2     | PhCl        | 56        |
| 3     | DCE         | 30        |
| 4     | TFE         | -         |
| 5     | 1,4-dioxane | -         |

|   |                   |    |
|---|-------------------|----|
| 6 | DMF               | -  |
| 7 | toluene           | 43 |
| 8 | PhCF <sub>3</sub> | 50 |

**Table S7: Optimization of the amount of solvent**

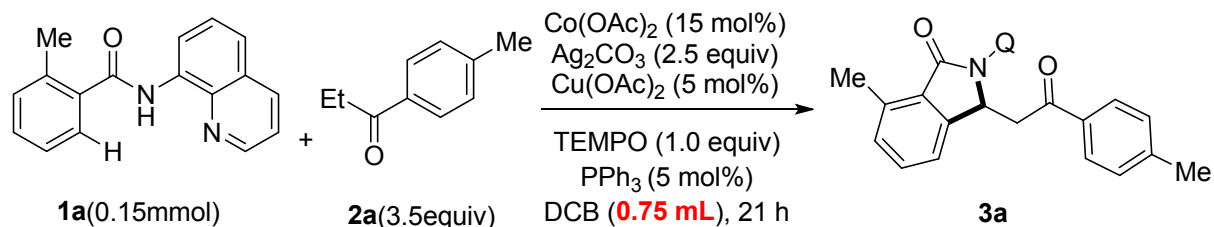

| Entry | mL          | Yield(%)  |
|-------|-------------|-----------|
| 1     | 0.5         | 55        |
| 2     | <b>0.75</b> | <b>76</b> |
| 3     | 1.0         | 63        |

**Table S8: Optimization of time**

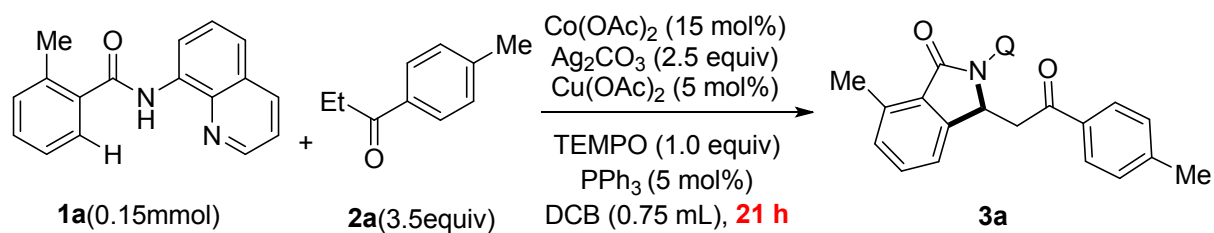

| Entry | Time(h)   | Yield(%)  |
|-------|-----------|-----------|
| 1     | 18        | 60        |
| 2     | <b>21</b> | <b>76</b> |
| 3     | 24        | 67        |

### 3. General experimental procedures

#### (1) Synthesis of N-(quinolin-8-yl)benzamides

All amides bearing 8-aminoquinoline moiety were prepared by the reaction of the corresponding acids or acid chlorides with 8-aminoquinoline.<sup>1</sup>

#### General procedure

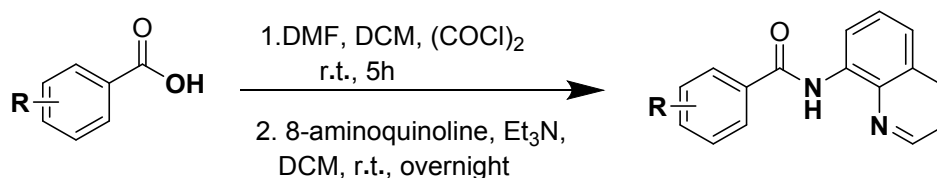

To an oven-dried round bottom flask (100 mL) charged with a magnetic stir-bar was added benzoic acid (10 mmol), DMF (50  $\mu$ L) and DCM (30 mL). Oxalyl chloride (20 mmol, 1.8 mL) was added drop wise under ice cold condition. The ice bath was removed and the reaction mixture was stirred at room temperature for 5 h. The solvent was then removed by evaporation under reduced pressure, and the resulting residue was dissolved in CH<sub>2</sub>Cl<sub>2</sub> (15 mL). After cooling the reaction mixture to 0  $^{\circ}$ C, another oven-dried round bottom flask (100 mL) charged with a magnetic stir-bar was added 8- aminoquinoline (10 mmol, 1.44 g), Et<sub>3</sub>N (20 mmol, 2.8 mL) and DCM (30 mL). To this, a solution of acid chloride in DCM was added dropwise under ice cold condition and was stirred overnight under room temperature. Then, it was treated with water, and extracted

with DCM (3 x 10 mL). The combined organic phase was dried over anhydrous  $\text{Na}_2\text{SO}_4$  and the solvent is removed by evaporation under reduced pressure and the residue was purified by column chromatography on silica gel (eluent: EtOAc/PE) to give the desired amides.

## **(2) General catalytic procedure**

In a glove box, a 25 mL Schlenk tube equipped with a stir bar was charged with benzamide (0.15 mmol),  $\text{Co}(\text{OAc})_2$  (4.1 mg, 15 mol%),  $\text{Ag}_2\text{CO}_3$  (103.5 mg, 2.5 equiv.),  $\text{Cu}(\text{OAc})_2$  (1.4 mg, 5 mol%),  $\text{P}(\text{Ph})_3$  (2.0 mg, 5 mol%), TEMPO (23.5 mg, 1.0 equiv.). The tube was fitted with a rubber septum, and removed out from the glove box. Then ketone (3.5 equiv.) was added through the rubber septum using syringe under the atmosphere of  $\text{N}_2$ . 1,2-Dichlorobenzene (0.75 mL) was added to the Schlenk tube through the rubber septum using a syringe. The septum was replaced by a Teflon screwcap under  $\text{N}_2$  flow. The reaction mixture was stirred at 110 °C (pre-heated to 110 °C) for 21 h. After cooling down, the solvent was removed in vacuo and the residue was purified by chromatography on silica gel (eluent: EtOAc/PE) to provide the corresponding product.



## 4. The characterization of products

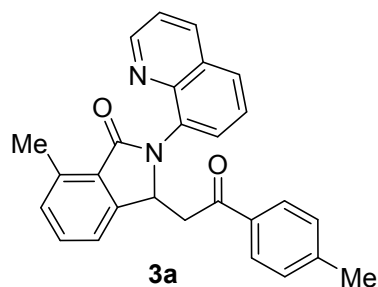

### 7-methyl-3-(2-oxo-2-(p-tolyl)ethyl)-2-(quinolin-8-yl)isoindolin-1-one

**(3a).** The title compound was isolated as an off-white solid ( $R_f = 0.3$  EtOAc/PE 2:3), (eluent: EtOAc/PE: 1/3; 43.6 mg, 76%).  $^1\text{H}$  NMR (400 MHz,  $\text{CDCl}_3$ )  $\delta$  8.88 (dd,  $J = 4.2, 1.7$  Hz, 1H), 8.15 (dd,  $J = 8.3, 1.7$  Hz, 1H), 7.83 – 7.79 (m, 2H), 7.57 (dd,  $J = 7.8, 6.3$  Hz, 3H), 7.43-7.37 (m, 2H), 7.35 (d,  $J = 7.5$  Hz, 1H), 7.26 – 7.24 (m, 1H), 7.10 (d,  $J = 8.0$  Hz, 2H), 6.47 (dd,  $J = 8.1, 4.8$  Hz, 1H), 3.36 (dd,  $J = 17.0, 4.8$  Hz, 1H), 3.23 (dd,  $J = 17.0, 8.2$  Hz, 1H), 2.79 (s, 3H), 2.33 (s, 3H).  $^{13}\text{C}$  NMR (101 MHz,  $\text{CDCl}_3$ )  $\delta$  197.1, 169.1, 150.4, 147.2, 145.0, 144.1, 138.3, 136.2, 134.1, 134.0, 131.6, 130.4, 130.3, 129.4, 129.2, 129.0, 128.1, 128.0, 126.3, 121.5, 120.5, 59.0, 42.4, 21.6, 17.6.

IR(KBr)  $\nu$  3042, 2920, 2895, 1684, 1605, 1475, 1400, 1200, 798, 688  $\text{cm}^{-1}$ .

HRMS (ESI): Calcd for  $\text{C}_{27}\text{H}_{23}\text{N}_2\text{O}_2$   $[\text{M}+\text{H}]^+$  407.1754, Found: 407.1759.

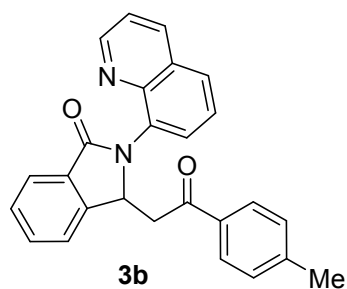

**3-(2-oxo-2-(p-tolyl)ethyl)-2-(quinolin-8-yl)isoindolin-1-one(3b).** The title compound was isolated as an off-white solid ( $R_f = 0.2$  EtOAc/PE 1:1), (eluent: EtOAc/PE: 2/3; 31.8 mg, 54%).  $^1\text{H NMR}$  (400 MHz,  $\text{CDCl}_3$ )  $\delta$  8.89 (dd,  $J = 4.2, 1.7$  Hz, 1H), 8.17 (dd,  $J = 8.3, 1.6$  Hz, 1H), 8.00 (d,  $J = 7.2$  Hz, 1H), 7.86 – 7.81 (m, 2H), 7.61 – 7.50 (m, 6H), 7.41 (dd,  $J = 8.3, 4.2$  Hz, 1H), 7.11 (d,  $J = 8.1$  Hz, 2H), 6.55 (dd,  $J = 8.5, 4.6$  Hz, 1H), 3.35 (dd,  $J = 17.1, 4.6$  Hz, 1H), 3.22 (dd,  $J = 17.1, 8.5$  Hz, 1H), 2.34 (s, 3H).  $^{13}\text{C NMR}$  (101 MHz,  $\text{CDCl}_3$ )  $\delta$  197.0, 168.3, 150.4, 146.6, 144.8, 144.2, 136.3, 134.0, 133.8, 132.0, 130.2, 129.5, 129.2, 128.3, 128.2, 128.0, 126.4, 124.3, 123.2, 121.6, 59.8, 4.1, 21.6.

IR(KBr)  $\nu$  3037, 2921, 2896, 1703, 1666, 1605, 1472, 1667, 1399, 1185, 759, 691  $\text{cm}^{-1}$ .

HRMS (ESI): Calcd for  $\text{C}_{26}\text{H}_{21}\text{N}_2\text{O}_2$   $[\text{M}+\text{H}]^+$  393.1598, Found: 393.1594.

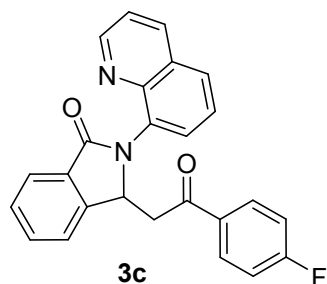

**3-(2-(4-fluorophenyl)-2-oxoethyl)-2-(quinolin-8-yl)isoindolin-1-one(3c).** The title compound was isolated as an off-white solid ( $R_f = 0.2$

EtOAc/PE 1:1), (eluent: EtOAc/PE: 2/3; 36.8 mg, 62%). <sup>1</sup>H NMR (600 MHz, CDCl<sub>3</sub>) δ 8.87 (dd, *J* = 4.1, 1.5 Hz, 1H), 8.16 (dd, *J* = 8.3, 1.2 Hz, 1H), 8.00 (d, *J* = 7.4 Hz, 1H), 7.84-7.80 (m, 2H), 7.68 – 7.65 (m, 2H), 7.60 – 7.52 (m, 4H), 7.40 (dd, *J* = 8.3, 4.1 Hz, 1H), 6.98 – 6.96 (m, 2H), 6.55 (dd, *J* = 8.0, 4.9 Hz, 1H), 3.38 (dd, *J* = 17.0, 4.8 Hz, 1H), 3.21 (dd, *J* = 17.0, 8.1 Hz, 1H). <sup>13</sup>C NMR (101 MHz, CDCl<sub>3</sub>) δ 195.8, 168.2, 165.8 (d, *J* = 256.6 Hz), 150.4, 146.3, 144.7, 136.3, 133.8, 132.9, 132.1, 132.0, 130.6 (d, *J* = 9.4 Hz), 130.3, 129.4, 128.4, 128.2, 126.4, 124.4, 123.1, 121.6, 115.6 (d, *J* = 22.0 Hz), 59.8, 42.1.

IR(KBr) ν 3056, 2924, 2853, 1698, 1595, 1503, 1472, 1395, 1212, 785, 750 cm<sup>-1</sup>.

HRMS (ESI): Calcd for C<sub>25</sub>H<sub>18</sub>FN<sub>2</sub>O<sub>2</sub> [M+H]<sup>+</sup> 397.1347, Found: 397.1346.

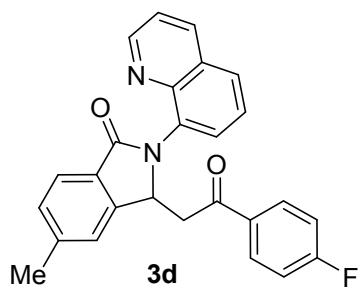

**3-(2-(4-fluorophenyl)-2-oxoethyl)-5-methyl-2-(quinolin-8-yl)isoindolin-1-one(3d).** The title compound was isolated as an off-white solid (*R*<sub>f</sub> = 0.2 EtOAc/PE 1:1), (eluent: EtOAc/PE: 2/3; 31.4 mg, 51%). <sup>1</sup>H NMR (400 MHz, CDCl<sub>3</sub>) δ 8.86 (dd, *J* = 4.1, 1.6 Hz, 1H), 8.15 (dd, *J* = 8.3, 1.6 Hz, 1H), 7.88 (d, *J* = 8.1 Hz, 1H), 7.83 – 7.78 (m, 2H), 7.69 – 7.65 (m, 2H), 7.59 – 7.55 (m, 1H), 7.39 (dd, *J* = 8.3, 4.2 Hz, 1H), 7.33 (d,

$J = 7.8$  Hz, 2H), 6.97 (t,  $J = 8.6$  Hz, 2H), 6.49 (dd,  $J = 7.9, 4.8$  Hz, 1H), 3.37 (dd,  $J = 17.1, 4.8$  Hz, 1H), 3.20 (dd,  $J = 17.1, 8.0$  Hz, 1H), 2.45 (s, 3H).  $^{13}\text{C}$  NMR (101 MHz,  $\text{CDCl}_3$ )  $\delta$  195.8, 168.4, 165.8 (d,  $J = 256.5$  Hz), 150.3, 146.7, 144.7, 142.8, 136.4, 133.9, 132.9, 130.6 (d,  $J = 9.4$  Hz), 130.3, 129.4, 128.1, 126.4, 124.2, 123.5, 121.6, 115.6 (d,  $J = 22.0$  Hz), 59.5, 42.2, 22.1.

IR(KBr)  $\nu$  3061, 2924, 2852, 1688, 1598, 1500, 1401, 1214, 1155, 831, 689  $\text{cm}^{-1}$ .

HRMS (ESI): Calcd for  $\text{C}_{26}\text{H}_{20}\text{FN}_2\text{O}_2$   $[\text{M}+\text{H}]^+$  411.1503, Found: 411.1501.

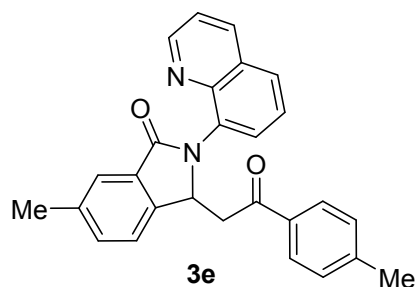

### **6-methyl-3-(2-oxo-2-(p-tolyl)ethyl)-2-(quinolin-8-yl)isoindolin-1-one**

**(3e)**. The title compound was isolated as an off-white solid ( $R_f = 0.2$  EtOAc/PE 1:1), (eluent: EtOAc/PE: 1/3; 27.4 mg, 45%).  $^1\text{H}$  NMR (600 MHz,  $\text{CDCl}_3$ )  $\delta$  8.88 (dd,  $J = 4.1, 1.5$  Hz, 1H), 8.16 (dd,  $J = 8.3, 1.5$  Hz, 1H), 7.84 (dd,  $J = 7.3, 1.2$  Hz, 1H), 7.81 (dd,  $J = 6.2, 1.7$  Hz, 2H), 7.59 (d,  $J = 7.7$  Hz, 1H), 7.56 (d,  $J = 8.4$  Hz, 2H), 7.43 – 7.39 (m, 2H), 7.36 (dd,  $J = 7.8, 0.8$  Hz, 1H), 7.11 (d,  $J = 8.1$  Hz, 2H), 6.49 (dd,  $J = 8.5, 4.5$  Hz, 1H), 3.32 (dd,  $J = 17.0, 4.6$  Hz, 1H), 3.19 (dd,  $J = 17.0, 8.6$  Hz, 1H), 2.47 (s, 3H), 2.34 (s, 3H).  $^{13}\text{C}$  NMR (101 MHz,  $\text{CDCl}_3$ )  $\delta$  197.1, 168.5, 150.4,

144.8, 144.2, 143.8, 138.3, 136.3, 134.1, 134.0, 133.0, 132.1, 130.2, 129.4, 129.2, 128.1, 128.0, 126.4, 124.4, 123.0, 121.6, 59.7, 42.2, 21.6, 21.4.

IR(KBr)  $\nu$  3034, 2922, 2855, 1700, 1604, 1496, 1395, 1177, 819, 789  $\text{cm}^{-1}$ .

HRMS (ESI): Calcd for  $\text{C}_{27}\text{H}_{23}\text{N}_2\text{O}_2$   $[\text{M}+\text{H}]^+$  407.1754, Found: 407.1749.

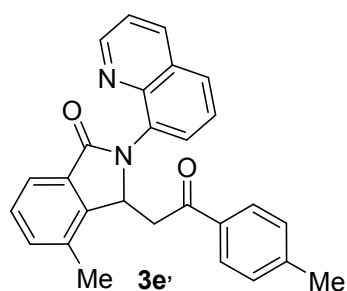

**4-methyl-3-(2-oxo-2-(p-tolyl)ethyl)-2-(quinolin-8-yl)isoindolin-1-one**

**(3e').** The title compound was isolated in a lower yield, so we could not provide the NMR spectrum. HRMS (ESI): Calcd for  $\text{C}_{27}\text{H}_{23}\text{N}_2\text{O}_2$   $[\text{M}+\text{H}]^+$  407.1754, Found: 407.1752.

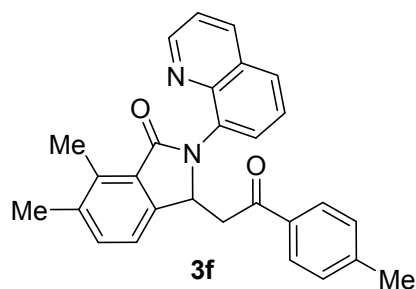

**6,7-dimethyl-3-(2-oxo-2-(p-tolyl)ethyl)-2-(quinolin-8-yl)isoindolin-1-**

**one(3f).** The title compound was isolated as an off-white solid ( $R_f = 0.3$  EtOAc/PE 2:3), (eluent: EtOAc/PE: 1/3; 51.7 mg, 82%).  $^1\text{H}$  NMR (400 MHz,  $\text{CDCl}_3$ )  $\delta$  8.88 (dd,  $J = 4.2, 1.7$  Hz, 1H), 8.15 (dd,  $J = 8.3, 1.7$  Hz, 1H), 7.80 (d,  $J = 7.8$  Hz, 2H), 7.57 (t,  $J = 8.3$  Hz, 3H), 7.39 (dd,  $J = 8.3,$

4.2 Hz, 1H), 7.31 (d,  $J = 7.7$  Hz, 1H), 7.24 (d,  $J = 7.7$  Hz, 1H), 7.10 (d,  $J = 8.0$  Hz, 2H), 6.35 (dd,  $J = 8.0, 4.9$  Hz, 1H), 3.34 (dd,  $J = 16.9, 4.9$  Hz, 1H), 3.21 (dd,  $J = 16.9, 8.1$  Hz, 1H), 2.75 (s, 3H), 2.36 (s, 3H), 2.33 (s, 3H).  $^{13}\text{C}$  NMR (101 MHz,  $\text{CDCl}_3$ )  $\delta$  197.2, 169.5, 150.4, 145.0, 144.9, 144.1, 137.5, 137.0, 136.2, 134.3, 134.2, 133.1, 130.5, 129.4, 129.1, 128.7, 128.1, 128.0, 126.3, 121.5, 119.9, 58.4, 42.5, 21.6, 19.3, 13.1.

IR(KBr)  $\nu$  3039, 2922, 2861, 1692, 1605, 1474, 1394, 1189, 815, 793  $\text{cm}^{-1}$ .

HRMS (ESI): Calcd for  $\text{C}_{28}\text{H}_{25}\text{N}_2\text{O}_2$   $[\text{M}+\text{H}]^+$  421.1911, Found: 421.1906.

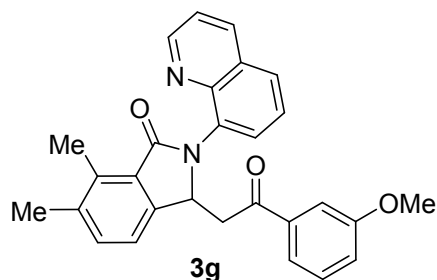

**3-(2-(3-methoxyphenyl)-2-oxoethyl)-6,7-dimethyl-2-(quinolin-8-**

**yl)isoindolin-1-one (3g).** The title compound was isolated as an off-white solid ( $R_f = 0.2$  EtOAc/PE 2:3), (eluent: EtOAc/PE: 1/3; 39.9 mg, 61%).

$^1\text{H}$  NMR (400 MHz,  $\text{CDCl}_3$ )  $\delta$  8.89 (d,  $J = 2.8$  Hz, 1H), 8.18 (d,  $J = 8.1$  Hz, 1H), 7.82 (d,  $J = 7.6$  Hz, 2H), 7.59 (t,  $J = 7.7$  Hz, 1H), 7.41 (dd,  $J = 8.1, 4.1$  Hz, 1H), 7.35 (d,  $J = 7.6$  Hz, 1H), 7.28-7.18 (m, 4H), 7.02 (d,  $J = 3.1$  Hz, 1H), 6.40 – 6.37 (m, 1H), 3.78 (s, 3H), 3.39 (dd,  $J = 17.0, 4.9$  Hz, 1H), 3.25 (dd,  $J = 17.0, 7.8$  Hz, 1H), 2.78 (s, 3H), 2.39 (s, 3H).  $^{13}\text{C}$  NMR (101 MHz,  $\text{CDCl}_3$ )  $\delta$  197.4, 169.5, 159.6, 150.4, 145.0, 144.8, 137.9, 137.6, 137.0, 136.2, 134.2, 133.1, 130.5, 129.2, 128.7, 128.1, 126.3,

121.5, 120.6, 119.8, 119.7, 112.0, 58.4, 55.4, 42.8, 19.3, 13.1.

IR(KBr)  $\nu$  3018, 2926, 2889, 1688, 1594, 1475, 1399, 1269, 1161, 831, 791  $\text{cm}^{-1}$ .

HRMS (ESI): Calcd for  $\text{C}_{28}\text{H}_{25}\text{N}_2\text{O}_3$   $[\text{M}+\text{H}]^+$  437.1860, Found: 437.1855.

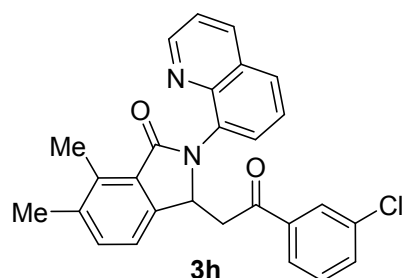

**3-(2-(3-chlorophenyl)-2-oxoethyl)-6,7-dimethyl-2-(quinolin-8-**

**yl)isoindolin-1-one(3h).** The title compound was isolated as an off-white solid ( $R_f = 0.3$  EtOAc/PE 2:3), (eluent: EtOAc/PE: 1/3; 37.6 mg, 57%).

$^1\text{H}$  NMR (400 MHz,  $\text{CDCl}_3$ )  $\delta$  8.85 (dd,  $J = 4.1, 1.5$  Hz, 1H), 8.15 (d,  $J = 8.2$  Hz, 1H), 7.80 – 7.77 (m, 2H), 7.56 (t,  $J = 7.8$  Hz, 1H), 7.50 (t,  $J = 1.7$  Hz, 1H), 7.47 (d,  $J = 7.8$  Hz, 1H), 7.42 – 7.37 (m, 2H), 7.33 (d,  $J = 7.7$  Hz, 1H), 7.24 – 7.20 (m, 2H), 6.35 (t,  $J = 6.3$  Hz, 1H), 3.38 (dd,  $J = 16.8, 5.5$  Hz, 1H), 3.18 (dd,  $J = 16.8, 7.3$  Hz, 1H), 2.75 (s, 3H), 2.37 (s, 3H).

$^{13}\text{C}$  NMR (101 MHz,  $\text{CDCl}_3$ )  $\delta$  196.4, 169.4, 150.4, 144.9, 144.5, 138.0, 137.8, 137.2, 136.2, 134.8, 134.1, 133.2, 133.0, 130.5, 129.7, 129.4, 128.7, 128.1, 127.9, 126.3, 125.9, 121.6, 119.7, 58.4, 42.9, 19.3, 13.1.

IR(KBr)  $\nu$  3059, 2923, 2889, 1681, 1570, 1476, 1397, 1207, 1024, 797, 690  $\text{cm}^{-1}$ .

HRMS (ESI): Calcd for  $\text{C}_{27}\text{H}_{22}\text{ClN}_2\text{O}_2$   $[\text{M}+\text{H}]^+$  441.1364, Found: 441.1363.

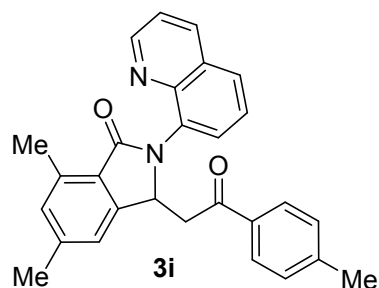

**5,7-dimethyl-3-(2-oxo-2-(p-tolyl)ethyl)-2-(quinolin-8-yl)isoindolin-1-**

**one (3i).** The title compound was isolated as an off-white solid ( $R_f = 0.3$  EtOAc/PE 2:3), (eluent: EtOAc/PE: 1/3; 49.2 mg, 78%).  $^1\text{H}$  NMR (400 MHz,  $\text{CDCl}_3$ )  $\delta$  8.88 (d,  $J = 2.6$  Hz, 1H), 8.15 (dd,  $J = 8.2, 1.3$  Hz, 1H), 7.81 – 7.78 (m, 2H), 7.56 (dt,  $J = 7.0, 3.5$  Hz, 3H), 7.39 (dd,  $J = 8.2, 4.2$  Hz, 1H), 7.11 (dd,  $J = 20.8, 12.8$  Hz, 4H), 6.41 (dd,  $J = 7.8, 4.7$  Hz, 1H), 3.35 (dd,  $J = 17.1, 4.7$  Hz, 1H), 3.23 (dd,  $J = 17.1, 8.1$  Hz, 1H), 2.74 (s, 3H), 2.38 (s, 3H), 2.34 (s, 3H).  $^{13}\text{C}$  NMR (101 MHz,  $\text{CDCl}_3$ )  $\delta$  197.2, 169.2, 150.4, 147.6, 145.0, 144.1, 142.1, 138.0, 136.3, 134.2, 131.3, 130.4, 129.4, 129.1, 128.8, 128.0, 128.0, 126.5, 126.3, 121.5, 121.0, 58.8, 42.5, 21.8, 21.6, 17.4.

IR(KBr)  $\nu$  2921, 2853, 1687, 1606, 1501, 1471, 1363, 1401, 1206, 790, 694  $\text{cm}^{-1}$ .

HRMS (ESI): Calcd for  $\text{C}_{28}\text{H}_{25}\text{N}_2\text{O}_2$   $[\text{M}+\text{H}]^+$  421.1911, Found: 421.1916.

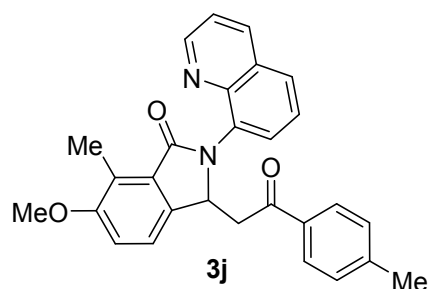

**6-methoxy-7-methyl-3-(2-oxo-2-(p-tolyl)ethyl)-2-(quinolin-8-**



**yl)isoindolin-1-one(3j).** The title compound was isolated as an off-white solid ( $R_f = 0.3$  EtOAc/PE 2:3), (eluent: EtOAc/PE: 1/3; 47.1 mg, 72%).

$^1\text{H}$  NMR (600 MHz,  $\text{CDCl}_3$ )  $\delta$  8.89 (dd,  $J = 4.2, 1.7$  Hz, 1H), 8.15 (dd,  $J = 8.3, 1.7$  Hz, 1H), 7.81 – 7.79 (m, 2H), 7.57 (t,  $J = 8.3$  Hz, 3H), 7.39 (dd,  $J = 8.3, 4.2$  Hz, 1H), 7.29 (d,  $J = 8.3$  Hz, 1H), 7.10 (d,  $J = 8.1$  Hz, 2H), 7.00 (d,  $J = 8.3$  Hz, 1H), 6.34 (dd,  $J = 8.3, 4.6$  Hz, 1H), 3.87 (s, 3H), 3.32 (dd,  $J = 16.9, 4.7$  Hz, 1H), 3.20 (dd,  $J = 16.9, 8.4$  Hz, 1H), 2.68 (s, 3H), 2.33 (s, 3H).  $^{13}\text{C}$  NMR (101 MHz,  $\text{CDCl}_3$ )  $\delta$  197.4, 169.2, 158.0, 150.4, 145.0, 144.1, 138.8, 136.3, 134.2, 134.2, 130.4, 129.9, 129.4, 129.1, 128.8, 128.1, 128.0, 127.0, 126.3, 121.5, 120.7, 113.7, 58.3, 56.2, 42.8, 21.6, 9.7.

IR(KBr)  $\nu$  2951, 2923, 1682, 1608, 1487, 1394, 1365, 1251, 1103, 816, 786  $\text{cm}^{-1}$ .

HRMS (ESI): Calcd for  $\text{C}_{28}\text{H}_{25}\text{N}_2\text{O}_3$   $[\text{M}+\text{H}]^+$  437.1860, Found: 437.1865.

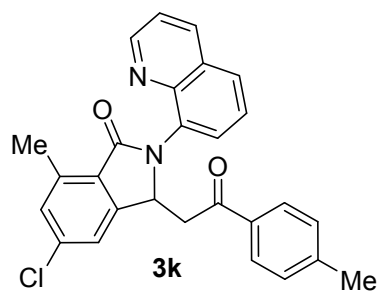

**5-chloro-7-methyl-3-(2-oxo-2-(p-tolyl)ethyl)-2-(quinolin-8-**

**yl)isoindolin-1-one(3k).** The title compound was isolated as an off-white solid ( $R_f = 0.3$  EtOAc/PE 2:3), (eluent: EtOAc/PE: 1/3; 34.3 mg, 52%).

$^1\text{H}$  NMR (600 MHz,  $\text{CDCl}_3$ )  $\delta$  8.88 (dd,  $J = 4.1, 1.6$  Hz, 1H), 8.17 – 8.16

(m, 1H), 7.82 – 7.80 (m, 2H), 7.56 – 7.57 (m, 3H), 7.41 (dd,  $J = 8.2, 4.1$  Hz, 1H), 7.38 (s, 1H), 7.26 (d,  $J = 5.9$  Hz, 1H), 7.12 (d,  $J = 8.1$  Hz, 2H), 6.45 (dd,  $J = 8.3, 4.3$  Hz, 1H), 3.37 (dd,  $J = 17.4, 4.3$  Hz, 1H), 3.22 (dd,  $J = 17.4, 8.4$  Hz, 1H), 2.76 (s, 3H), 2.34 (s, 3H).  $^{13}\text{C}$  NMR (101 MHz,  $\text{CDCl}_3$ )  $\delta$  196.7, 168.2, 150.5, 148.8, 144.8, 144.3, 134.0, 137.6, 136.3, 133.9, 133.6, 130.5, 130.4, 129.4, 129.2, 128.2, 128.0, 127.6, 126.3, 121.6, 121.1, 58.6, 42.1, 21.6, 17.4.

IR(KBr)  $\nu$  3040, 2920, 2852, 1697, 1600, 1500, 1468, 1393, 1188, 794, 689  $\text{cm}^{-1}$ .

HRMS (ESI): Calcd for  $\text{C}_{27}\text{H}_{22}\text{ClN}_2\text{O}_2$   $[\text{M}+\text{H}]^+$  441.1364, Found: 441.1360.

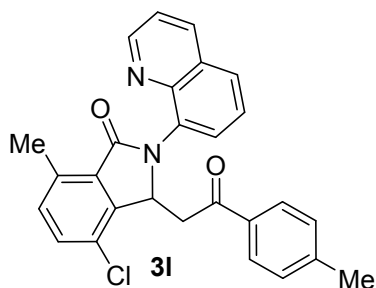

**4-chloro-7-methyl-3-(2-oxo-2-(p-tolyl)ethyl)-2-(quinolin-8-**

**yl)isoindolin-1-one(31).** The title compound was isolated as an off-white solid ( $R_f = 0.3$  EtOAc/PE 2:3), (eluent: EtOAc/PE: 1/3; 30.4 mg, 46%).  $^1\text{H}$  NMR (400 MHz,  $\text{CDCl}_3$ )  $\delta$  8.81 (dd,  $J = 4.2, 1.7$  Hz, 1H), 8.11 (dd,  $J = 8.3, 1.7$  Hz, 1H), 7.75-7.69 (m, 2H), 7.47 – 7.41 (m, 2H), 7.35 (dd,  $J = 8.2, 5.1$  Hz, 3H), 7.23 (d,  $J = 8.2$  Hz, 1H), 7.02 (d,  $J = 8.0$  Hz, 2H), 6.44 (dd,  $J = 6.4, 3.5$  Hz, 1H), 3.62 (dd,  $J = 17.2, 6.5$  Hz, 1H), 3.56 (dd,  $J = 17.2, 3.6$  Hz, 1H), 2.77 (s, 3H), 2.31 (s, 3H).  $^{13}\text{C}$  NMR (101 MHz,  $\text{CDCl}_3$ )

$\delta$  195.9, 168.0, 150.3, 144.8, 143.6, 143.2, 137.1, 136.2, 134.0, 133.6, 132.0, 131.8, 131.6, 130.6, 129.2, 128.9, 128.1, 127.7, 126.2, 125.8, 121.4, 58.7, 39.1, 21.5, 17.1.

IR(KBr)  $\nu$  3037, 2919, 2852, 1693, 1602, 1500, 1475, 1403, 1180, 826, 787  $\text{cm}^{-1}$ .

HRMS (ESI): Calcd for  $\text{C}_{27}\text{H}_{22}\text{ClN}_2\text{O}_2$   $[\text{M}+\text{H}]^+$  441.1364, Found: 441.1358.

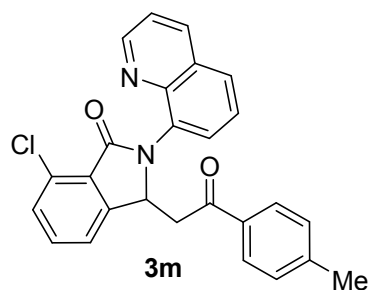

**7-chloro-3-(2-oxo-2-(p-tolyl)ethyl)-2-(quinolin-8-yl)isoindolin-1-**

**one(3m).** The title compound was isolated as an off-white solid ( $R_f = 0.3$  EtOAc/PE 2:3), (eluent: EtOAc/PE: 1/3; 25.6 mg, 40%).  $^1\text{H}$  NMR (600 MHz,  $\text{CDCl}_3$ )  $\delta$  8.88 (dd,  $J = 4.1, 1.7$  Hz, 1H), 8.17 (dd,  $J = 8.3, 1.6$  Hz, 1H), 7.85 (dd,  $J = 7.3, 1.3$  Hz, 1H), 7.82 (dd,  $J = 8.2, 1.2$  Hz, 1H), 7.59 – 7.56 (m, 3H), 7.46 – 7.44 (m, 3H), 7.41 (dd,  $J = 8.3, 4.2$  Hz, 1H), 7.12 (d,  $J = 8.1$  Hz, 2H), 6.56 (dd,  $J = 8.6, 4.3$  Hz, 1H), 3.35 (dd,  $J = 17.2, 4.4$  Hz, 1H), 3.20 (dd,  $J = 17.2, 8.6$  Hz, 1H), 2.34 (s, 3H).  $^{13}\text{C}$  NMR (101 MHz,  $\text{CDCl}_3$ )  $\delta$  196.7, 165.9, 150.4, 149.1, 144.7, 144.4, 136.3, 133.9, 133.3, 132.7, 132.1, 130.4, 130.0, 129.4, 129.2, 128.3, 128.0, 126.3, 121.8, 121.6, 58.5, 42.1, 21.6.

IR(KBr)  $\nu$  3045, 2924, 2853, 1702, 1602, 1466, 1498, 1394, 1195, 807,

688 cm<sup>-1</sup>.

HRMS (ESI): Calcd for C<sub>26</sub>H<sub>20</sub>ClN<sub>2</sub>O<sub>2</sub> [M+H]<sup>+</sup> 427.1208, Found: 427.1205.

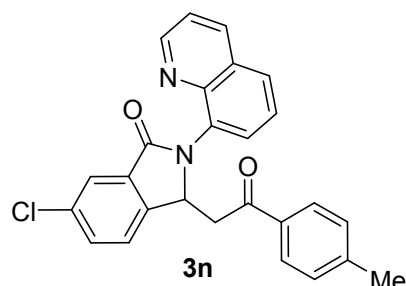

**6-chloro-3-(2-oxo-2-(p-tolyl)ethyl)-2-(quinolin-8-yl)isoindolin-1-one**

**(3n).** The title compound was isolated as an off-white solid (*R<sub>f</sub>* = 0.3 EtOAc/PE 2:3), (eluent: EtOAc/PE: 1/3; 32.0 mg, 50%). <sup>1</sup>H NMR (600 MHz, CDCl<sub>3</sub>) δ 8.89 (dd, *J* = 4.1, 1.7 Hz, 1H), 8.18 (dd, *J* = 8.3, 1.6 Hz, 1H), 7.96 (d, *J* = 1.0 Hz, 1H), 7.85 – 7.82 (m, 2H), 7.61 – 7.57 (m, 3H), 7.51 (d, *J* = 1.2 Hz, 2H), 7.42 (dd, *J* = 8.3, 4.2 Hz, 1H), 7.12 (d, *J* = 8.1 Hz, 2H), 6.52 (dd, *J* = 8.9, 4.3 Hz, 1H), 3.34 (dd, *J* = 17.2, 4.3 Hz, 1H), 3.20 (dd, *J* = 17.2, 8.9 Hz, 1H), 2.34 (s, 3H). <sup>13</sup>C NMR (101 MHz, CDCl<sub>3</sub>) δ 196.8, 167.0, 150.5, 144.7, 144.0, 144.4, 136.45, 134.6, 133.9, 133.8, 133.4, 132.1, 130.2, 129.5, 129.2, 128.4, 128.0, 126.4, 124.7, 124.3, 121.7, 59.5, 41.8, 21.6.

IR(KBr) ν 3042, 2922, 2853, 1695, 1602, 1500, 1472, 1402, 1204, 795, 694 cm<sup>-1</sup>.

HRMS (ESI): Calcd for C<sub>26</sub>H<sub>20</sub>ClN<sub>2</sub>O<sub>2</sub> [M+H]<sup>+</sup> 427.1208, Found: 427.1208.

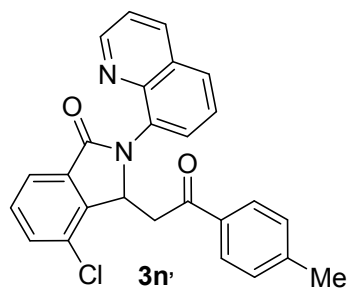

**4-chloro-3-(2-oxo-2-(p-tolyl)ethyl)-2-(quinolin-8-yl)isoindolin-1-one**

**(3n')** The title compound was isolated in a lower yield, so we could not provide the NMR spectrum. HRMS (ESI): Calcd for  $C_{26}H_{20}ClN_2O_2$   $[M+H]^+$  427.1208, Found: 427.1204.

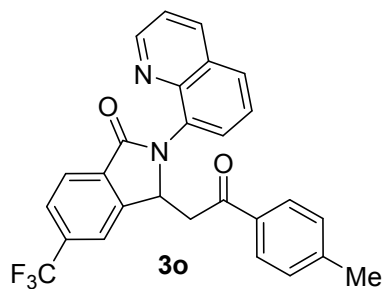

**3-(2-oxo-2-(p-tolyl)ethyl)-2-(quinolin-8-yl)-5-**

**(trifluoromethyl)isoindolin-1-one(3o).** The title compound was isolated as an off-white solid ( $R_f = 0.4$  EtOAc/PE 1:1), (eluent: EtOAc/PE: 2/3; 31.1mg, 45%).  $^1H$  NMR (600 MHz,  $CDCl_3$ )  $\delta$  8.89 (dd,  $J = 3.9, 1.3$  Hz, 1H), 8.20 – 8.18 (m, 1H), 8.11 (d,  $J = 7.9$  Hz, 1H), 7.86 (dd,  $J = 13.5, 6.5$  Hz, 3H), 7.80 (d,  $J = 8.0$  Hz, 1H), 7.63 – 7.60 (m, 1H), 7.58 (d,  $J = 8.2$  Hz, 2H), 7.43 (dd,  $J = 8.3, 4.1$  Hz, 1H), 7.13 (d,  $J = 8.0$  Hz, 2H), 6.60 (dd,  $J = 8.5, 4.2$  Hz, 1H), 3.43 (dd,  $J = 17.4, 4.2$  Hz, 1H), 3.24 (dd,  $J = 17.4, 8.6$  Hz, 1H), 2.34 (s, 3H).  $^{13}C$  NMR (101 MHz,  $CDCl_3$ )  $\delta$  196.5, 167.0, 150.6, 146.9, 144.5, 136.4, 135.4, 134.0, 133.8, 133.7, 133.2, 130.2, 130.0 ( $CF_3$ ), 129.5, 129.2, 129.0, 128.6, 128.0, 126.4, 125.6 (d,  $J = 3.7$

Hz), 125.2 (CF<sub>3</sub>), 124.8, 122.5 (CF<sub>3</sub>), 121.8, 120.8 (d, *J* = 3.8 Hz), 59.7, 41.6, 21.6.

IR(KBr)  $\nu$  3045, 2923, 2855, 1702, 1606, 1500, 1404, 1329, 1169, 1126, 791, 691 cm<sup>-1</sup>.

HRMS (ESI): Calcd for C<sub>27</sub>H<sub>20</sub>F<sub>3</sub>N<sub>2</sub>O<sub>2</sub> [M+H]<sup>+</sup> 461.1471, Found: 461.1469.

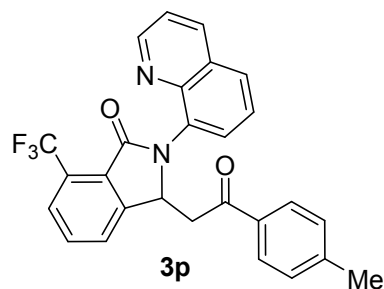

### **3-(2-oxo-2-(p-tolyl)ethyl)-2-(quinolin-8-yl)-7-**

**(trifluoromethyl)isoindolin-1-one(3p).** The title compound was isolated as an off-white solid (*R<sub>f</sub>* = 0.3 EtOAc/PE 2:3), (eluent: EtOAc/PE: 1/3; 57.3mg, 83%; **1p** 1.5mmol, **3p** 0.4 g, 58%). <sup>1</sup>H NMR (400 MHz, CDCl<sub>3</sub>)  $\delta$  8.88 (dd, *J* = 4.2, 1.7 Hz, 1H), 8.18 (dd, *J* = 8.3, 1.6 Hz, 1H), 7.90 (dd, *J* = 7.4, 1.2 Hz, 1H), 7.82 (dd, *J* = 11.1, 4.1 Hz, 3H), 7.64 (t, *J* = 7.7 Hz, 1H), 7.58 (t, *J* = 7.7 Hz, 3H), 7.41 (dd, *J* = 8.3, 4.2 Hz, 1H), 7.13 (d, *J* = 8.1 Hz, 2H), 6.70 (dd, *J* = 8.7, 4.1 Hz, 1H), 3.40 (dd, *J* = 17.3, 4.2 Hz, 1H), 3.24 (dd, *J* = 17.3, 8.8 Hz, 1H), 2.34 (s, 3H). <sup>13</sup>C NMR (101 MHz, CDCl<sub>3</sub>)  $\delta$  196.7, 164.9, 150.4, 148.9, 144.5 (d, *J* = 6.0 Hz), 136.4, 133.8, 133.1, 131.7, 130.4, 129.4, 129.3 (CF<sub>3</sub>), 129.3, 128.3, 128.0, 127.5 (d, *J* = 34.7 Hz), 127.1, 126.2, 126.0 (d, *J* = 5.8 Hz), 124.3 (CF<sub>3</sub>), 121.6, 121.6 (CF<sub>3</sub>), 58.9, 41.9, 21.6.

IR(KBr)  $\nu$  3040, 2924, 2854, 1704, 1606, 1503, 1398, 1329, 1148, 806, 697  $\text{cm}^{-1}$ .

HRMS (ESI): Calcd for  $\text{C}_{27}\text{H}_{20}\text{F}_3\text{N}_2\text{O}_2$   $[\text{M}+\text{H}]^+$  461.1471, Found: 461.1470.

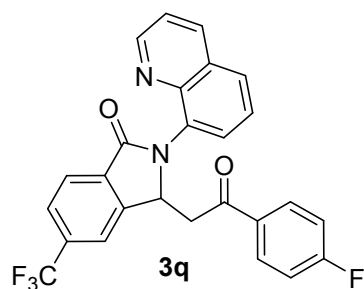

**3-(2-(4-fluorophenyl)-2-oxoethyl)-2-(quinolin-8-yl)-5-**

**(trifluoromethyl)isoindolin-1-one(3q).** The title compound was isolated as an off-white solid ( $R_f = 0.2$  EtOAc/PE 2:3), (eluent: EtOAc/PE: 1/3; 34.8mg, 50%).  $^1\text{H}$  NMR (600 MHz,  $\text{CDCl}_3$ )  $\delta$  8.87 (d,  $J = 2.7$  Hz, 1H), 8.18 (d,  $J = 7.4$  Hz, 1H), 8.11 (d,  $J = 7.9$  Hz, 1H), 7.88 (s, 1H), 7.85 (d,  $J = 7.8$  Hz, 2H), 7.81 (d,  $J = 7.9$  Hz, 1H), 7.69 (dd,  $J = 8.8, 5.4$  Hz, 2H), 7.61 (t,  $J = 7.8$  Hz, 1H), 7.43 (dd,  $J = 8.2, 4.1$  Hz, 1H), 6.99 (t,  $J = 8.6$  Hz, 2H), 6.61 (dd,  $J = 8.1, 4.5$  Hz, 1H), 3.45 (dd,  $J = 17.4, 4.5$  Hz, 1H), 3.23 (dd,  $J = 17.4, 8.2$  Hz, 1H).  $^{13}\text{C}$  NMR (101 MHz,  $\text{CDCl}_3$ )  $\delta$  195.2, 167.2, 165.8 (d,  $J = 231.6$  Hz), 150.6, 146.7, 144.5, 136.4, 135.4, 133.9 (d,  $J = 32.4$  Hz), 133.2, 132.6 (d,  $J = 3.0$  Hz), 130.6 (d,  $J = 9.5$  Hz), 130.2, 129.5, 128.6, 126.4, 125.7 (d,  $J = 3.7$  Hz), 125.2( $\text{CF}_3$ ), 124.9, 122.5 ( $\text{CF}_3$ ), 121.8, 120.7(d,  $J = 3.9$  Hz), 115.7, (d,  $J = 22.1$  Hz), 59.7, 41.7.

IR(KBr)  $\nu$  3071, 2924, 2852, 1703, 1668, 1596, 1503, 1409, 1329, 1163,

1124, 801, 695  $\text{cm}^{-1}$ .

HRMS (ESI): Calcd for  $\text{C}_{26}\text{H}_{17}\text{F}_4\text{N}_2\text{O}_2$   $[\text{M}+\text{H}]^+$  465.1221, Found: 465.1228.

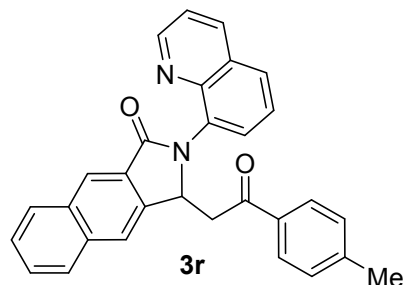

**3-(2-oxo-2-(p-tolyl)ethyl)-2-(quinolin-8-yl)-2,3-dihydro-1H-**

**benzo[f]isoindol-1-one(3r).** The title compound was isolated as an off-white solid ( $R_f = 0.3$  EtOAc/PE 2:3), (eluent: EtOAc/PE: 1/3; 38.5mg, 58%).  $^1\text{H}$  NMR (600 MHz,  $\text{CDCl}_3$ )  $\delta$  9.34 (d,  $J = 8.4$  Hz, 1H), 8.88 (dd,  $J = 4.1, 1.6$  Hz, 1H), 8.18 (dd,  $J = 8.3, 1.4$  Hz, 1H), 8.02 (d,  $J = 8.4$  Hz, 1H), 7.94 (d,  $J = 8.2$  Hz, 1H), 7.90 (dd,  $J = 7.3, 1.3$  Hz, 1H), 7.82 (dd,  $J = 8.3, 1.2$  Hz, 1H), 7.69-7.66 (m, 1H), 7.63 – 7.57 (m, 5H), 7.40 (dd,  $J = 8.3, 4.1$  Hz, 1H), 7.11 (d,  $J = 8.1$  Hz, 2H), 6.65 (dd,  $J = 8.3, 4.8$  Hz, 1H), 3.43 (dd,  $J = 17.0, 4.8$  Hz, 1H), 3.29 (dd,  $J = 17.0, 8.3$  Hz, 1H), 2.34 (s, 3H).  $^{13}\text{C}$  NMR (101 MHz,  $\text{CDCl}_3$ )  $\delta$  197.1, 169.3, 150.4, 147.3, 145.0, 144.2, 136.3, 134.0, 133.9, 133.3, 132.9, 130.4, 129.8, 129.5, 129.2, 128.1, 128.1, 128.0, 126.6, 126.3, 125.8, 125.8, 124.2, 121.6, 120.3, 59.4, 41.9, 21.6.

IR(KBr)  $\nu$  3049, 2920, 2852, 1684, 1600, 1500, 1465, 1356, 1398, 1184, 791, 751  $\text{cm}^{-1}$ .

HRMS (ESI): Calcd for  $\text{C}_{30}\text{H}_{23}\text{N}_2\text{O}_2$   $[\text{M}+\text{H}]^+$  443.1754, Found: 443.1753.



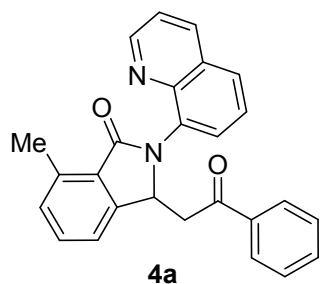

**7-methyl-3-(2-oxo-2-phenylethyl)-2-(quinolin-8-yl)isoindolin-1-one**

**(4a).** The title compound was isolated as an off-white solid ( $R_f = 0.2$  EtOAc/PE 2:3), (eluent: EtOAc/PE: 1/3; 37.0 mg, 63%).  $^1\text{H}$  NMR (600 MHz,  $\text{CDCl}_3$ )  $\delta$  8.87 (dd,  $J = 4.1, 1.7$  Hz, 1H), 8.15 (dd,  $J = 8.3, 1.6$  Hz, 1H), 7.82-7.79 (m, 2H), 7.64 (dd,  $J = 8.3, 1.2$  Hz, 2H), 7.57 (dd,  $J = 8.1, 7.5$  Hz, 1H), 7.47 – 7.45 (m, 1H), 7.42 (t,  $J = 7.6$  Hz, 1H), 7.39 (dd,  $J = 8.3, 4.2$  Hz, 1H), 7.36 (d,  $J = 7.5$  Hz, 1H), 7.32 – 7.29 (m, 2H), 7.25 (d,  $J = 7.8$  Hz, 1H), 6.48 (dd,  $J = 7.9, 4.9$  Hz, 1H), 3.40 (dd,  $J = 17.1, 4.9$  Hz, 1H), 3.26 (dd,  $J = 17.1, 8.0$  Hz, 1H), 2.79 (s, 3H).  $^{13}\text{C}$  NMR (101 MHz,  $\text{CDCl}_3$ )  $\delta$  197.5, 169.1, 150.4, 147.1, 144.9, 138.4, 136.5, 136.2, 134.0, 133.2, 131.6, 130.4, 130.4, 129.4, 129.0, 128.5, 128.1, 127.9, 126.3, 121.5, 120.4, 59.0, 42.5, 17.5.

IR(KBr)  $\nu$  3062, 2924, 2855, 1679, 1598, 1502, 1472, 1405, 788, 753, 695  $\text{cm}^{-1}$ .

HRMS (ESI): Calcd for  $\text{C}_{26}\text{H}_{21}\text{N}_2\text{O}_2$   $[\text{M}+\text{H}]^+$  393.1598, Found: 393.1598.

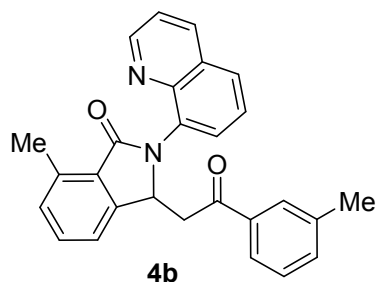

**7-methyl-3-(2-oxo-2-(m-tolyl)ethyl)-2-(quinolin-8-yl)isoindolin-1-one**

**(4a).** The title compound was isolated as an off-white solid ( $R_f = 0.3$  EtOAc/PE 2:3), (eluent: EtOAc/PE: 1/3; 43.9 mg, 72%).  $^1\text{H}$  NMR (400 MHz,  $\text{CDCl}_3$ )  $\delta$  8.87 (dd,  $J = 4.1, 1.6$  Hz, 1H), 8.15 (dd,  $J = 8.3, 1.5$  Hz, 1H), 7.81 (t,  $J = 6.7$  Hz, 2H), 7.57 (t,  $J = 7.8$  Hz, 1H), 7.45 – 7.37 (m, 4H), 7.35 (d,  $J = 7.5$  Hz, 1H), 7.26 (t,  $J = 7.4$  Hz, 2H), 7.19 (t,  $J = 7.9$  Hz, 1H), 6.47 (dd,  $J = 7.8, 5.0$  Hz, 1H), 3.38 (dd,  $J = 17.0, 4.9$  Hz, 1H), 3.24 (dd,  $J = 17.0, 8.0$  Hz, 1H), 2.79 (s, 3H), 2.29 (s, 3H).  $^{13}\text{C}$  NMR (101 MHz,  $\text{CDCl}_3$ )  $\delta$  197.7, 169.1, 150.4, 147.1, 145.0, 138.4, 138.3, 136.6, 136.2, 134.0, 131.6, 130.4, 130.4, 129.4, 129.0, 128.4, 128.3, 128.1, 126.3, 125.1, 121.5, 120.4, 59.0, 42.6, 21.2, 17.5.

IR(KBr)  $\nu$  3062, 2924, 2853, 1686, 1600, 1503, 1474, 1402, 1360, 1183, 783, 686  $\text{cm}^{-1}$ .

HRMS (ESI): Calcd for  $\text{C}_{27}\text{H}_{23}\text{N}_2\text{O}_2$   $[\text{M}+\text{H}]^+$  407.1754, Found: 407.1753.

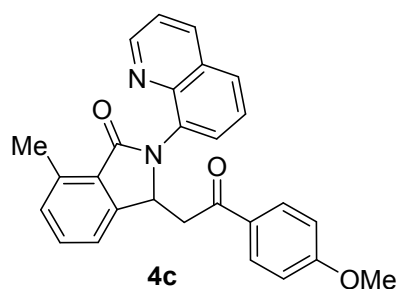

**3-(2-(4-methoxyphenyl)-2-oxoethyl)-7-methyl-2-(quinolin-8-**

**yl)isoindolin-1-one (4c).** The title compound was isolated as an off-white solid ( $R_f = 0.3$  EtOAc/PE 1:1), (eluent: EtOAc/PE: 1/3; 31.7 mg, 50%).  $^1\text{H}$  NMR (400 MHz,  $\text{CDCl}_3$ )  $\delta$  8.88 (dd,  $J = 4.2, 1.7$  Hz, 1H), 8.16 (dd,  $J = 8.3, 1.7$  Hz, 1H), 7.82-7.78 (m, 2H), 7.66 – 7.63 (m, 2H), 7.59 – 7.55

(m, 1H), 7.43 – 7.38 (m, 2H), 7.34 (d,  $J = 7.5$  Hz, 1H), 7.24 (d,  $J = 7.4$  Hz, 1H), 6.79 – 6.76 (m, 2H), 6.45 (dd,  $J = 8.1, 4.8$  Hz, 1H), 3.80 (s, 3H), 3.32 (dd,  $J = 16.8, 4.8$  Hz, 1H), 3.20 (dd,  $J = 16.8, 8.2$  Hz, 1H), 2.79 (s, 3H).<sup>13</sup>C NMR (101 MHz, CDCl<sub>3</sub>)  $\delta$  195.9, 169.1, 163.6, 150.4, 147.2, 145.0, 138.3, 136.2, 134.1, 131.5, 130.4, 130.3, 130.2, 129.7, 129.4, 129.0, 128.1, 126.2, 121.5, 120.5, 113.6, 59.1, 55.5, 42.1, 17.5.

IR(KBr)  $\nu$  3041, 2924, 2837, 1687, 1600, 1504, 1469, 1397, 1257, 1173, 789, 687 cm<sup>-1</sup>.

HRMS (ESI): Calcd for C<sub>27</sub>H<sub>23</sub>N<sub>2</sub>O<sub>3</sub> [M+H]<sup>+</sup> 423.1703, Found: 423.1707.

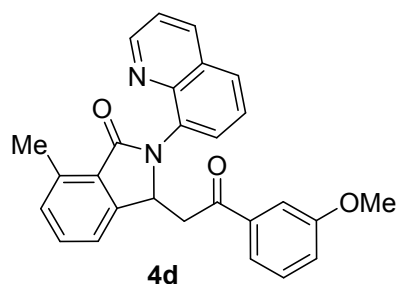

**3-(2-(3-methoxyphenyl)-2-oxoethyl)-7-methyl-2-(quinolin-8-**

**yl)isoindolin-1-one (4d).** The title compound was isolated as an off-white solid ( $R_f = 0.2$  EtOAc/PE 2:3), (eluent: EtOAc/PE: 1/3; 33.6 mg, 53%).

<sup>1</sup>H NMR (400 MHz, CDCl<sub>3</sub>)  $\delta$  8.87 (dd,  $J = 4.2, 1.7$  Hz, 1H), 8.16 (dd,  $J = 8.3, 1.5$  Hz, 1H), 7.82 – 7.79 (m, 2H), 7.59 – 7.55 (m, 1H), 7.44-7.38 (m, 2H), 7.35 (d,  $J = 7.5$  Hz, 1H), 7.25 (d,  $J = 5.9$  Hz, 1H), 7.21 – 7.20 (m, 2H), 7.17 (d,  $J = 1.8$  Hz, 1H), 7.02 – 6.99 (m, 1H), 6.46 (dd,  $J = 7.8, 5.0$  Hz, 1H), 3.76 (s, 3H), 3.38 (dd,  $J = 17.1, 4.9$  Hz, 1H), 3.24 (dd,  $J = 17.1, 7.9$  Hz, 1H), 2.79 (s, 3H).<sup>13</sup>C NMR (101 MHz, CDCl<sub>3</sub>)  $\delta$  197.3, 169.1, 159.7, 150.4, 147.0, 144.9, 138.4, 137.9, 136.2, 134.0, 131.6, 130.4,

130.4, 129.4, 129.0, 128.1, 126.3, 121.5, 120.6, 120.4, 119.7, 112.0, 59.0, 55.4, 42.7, 17.5.

IR(KBr)  $\nu$  3064, 2922, 2840, 1691, 1578, 1479, 1400, 1241, 785, 693  $\text{cm}^{-1}$ .

HRMS (ESI): Calcd for  $\text{C}_{27}\text{H}_{23}\text{N}_2\text{O}_3$   $[\text{M}+\text{H}]^+$  423.1703, Found: 423.1702.

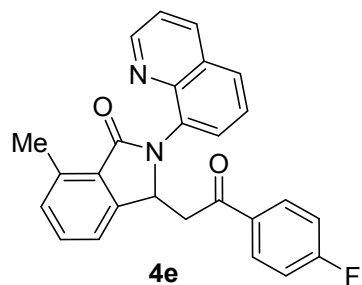

**3-(2-(4-fluorophenyl)-2-oxoethyl)-7-methyl-2-(quinolin-8-**

**yl)isoindolin-1-one (4e).** The title compound was isolated as an off-white solid ( $R_f = 0.2$  EtOAc/PE 2:3), (eluent: EtOAc/PE: 1/3; 44.3 mg, 72%).

$^1\text{H}$  NMR (400 MHz,  $\text{CDCl}_3$ )  $\delta$  8.86 (d,  $J = 3.8$  Hz, 1H), 8.14 (d,  $J = 8.2$  Hz, 1H), 7.80 – 7.78 (m, 2H), 7.65 (dd,  $J = 7.7, 5.8$  Hz, 2H), 7.56 (t,  $J = 7.7$  Hz, 1H), 7.44-7.37 (m, 2H), 7.33 (d,  $J = 7.4$  Hz, 1H), 7.25 (d,  $J = 6.9$  Hz, 1H), 6.96 (t,  $J = 8.4$  Hz, 2H), 6.46 – 6.43 (m, 1H), 3.37 (dd,  $J = 16.9, 4.9$  Hz, 1H), 3.21 (dd,  $J = 16.9, 7.7$  Hz, 1H), 2.78 (s, 3H).  $^{13}\text{C}$  NMR (101 MHz,  $\text{CDCl}_3$ )  $\delta$  195.9, 169.0, 165.7 (d,  $J = 256.5$  Hz), 150.4, 146.9, 144.9, 138.4, 136.3, 134.0, 133.0 (d,  $J = 2.9$  Hz), 131.6, 130.6, 130.5 – 130.4 (m), 129.4, 129.0, 128.1, 126.3, 121.6, 120.3, 115.6 (d,  $J = 22.0$  Hz), 59.0, 42.4, 17.5.

IR(KBr)  $\nu$  3065, 3013, 2903, 1678, 1576, 1504, 1473, 1401, 1227, 1154, 822, 787  $\text{cm}^{-1}$ .

HRMS (ESI): Calcd for  $C_{26}H_{20}FN_2O_2$   $[M+H]^+$  411.1503, Found: 411.1500.

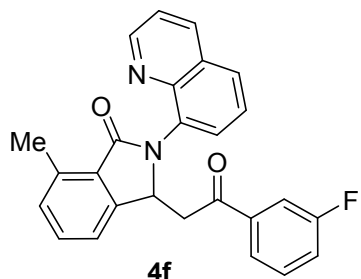

**3-(2-(3-fluorophenyl)-2-oxoethyl)-7-methyl-2-(quinolin-8-**

**yl)isoindolin-1-one(4f).** The title compound was isolated as an off-white solid ( $R_f = 0.2$  EtOAc/PE 2:3), (eluent: EtOAc/PE: 1/3; 30.8 mg, 50%).

$^1H$  NMR (400 MHz,  $CDCl_3$ )  $\delta$  8.87 (dd,  $J = 4.2, 1.7$  Hz, 1H), 8.16 (dd,  $J = 8.3, 1.7$  Hz, 1H), 7.80 (d,  $J = 7.7$  Hz, 2H), 7.57 (dd,  $J = 8.1, 7.5$  Hz, 1H), 7.45 – 7.38 (m, 3H), 7.34 (d,  $J = 7.5$  Hz, 1H), 7.30-7.25 (m, 3H), 7.18-7.13 (m, 1H), 6.46 (dd,  $J = 7.5, 5.3$  Hz, 1H), 3.39 (dd,  $J = 17.0, 5.2$  Hz, 1H), 3.22 (dd,  $J = 17.0, 7.6$  Hz, 1H), 2.79 (s, 3H).  $^{13}C$  NMR (101 MHz,  $CDCl_3$ )  $\delta$  196.3 (d,  $J = 2.1$  Hz), 169.0, 162.6 (d,  $J = 249.3$  Hz), 150.4, 146.8, 144.9, 138.6, 138.5, 136.3, 133.9, 131.6, 130.5 (d,  $J = 3.6$  Hz), 130.1 (d,  $J = 7.7$  Hz), 129.4, 129.0, 128.2, 126.3, 123.6 (d,  $J = 3.0$  Hz), 121.6, 120.3, 120.2 (d,  $J = 21.6$  Hz), 114.5 (d,  $J = 22.5$  Hz), 114.4, 58.9, 42.8, 17.5.

IR(KBr)  $\nu$  3068, 2920, 2852, 1687, 1591, 1503, 1477, 1447, 1400, 1240, 792, 685  $cm^{-1}$ .

HRMS (ESI): Calcd for  $C_{26}H_{20}FN_2O_2$   $[M+H]^+$  411.1503, Found: 411.1504.

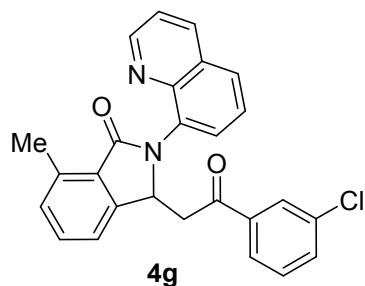

**3-(2-(3-chlorophenyl)-2-oxoethyl)-7-methyl-2-(quinolin-8-**

**yl)isoindolin-1-one(4g).** The title compound was isolated as an off-white solid ( $R_f = 0.2$  EtOAc/PE 2:3), (eluent: EtOAc/PE: 1/3; 33.8 mg, 53%).

$^1\text{H}$  NMR (400 MHz,  $\text{CDCl}_3$ )  $\delta$  8.86 (dd,  $J = 4.2, 1.7$  Hz, 1H), 8.15 (dd,  $J = 8.3, 1.7$  Hz, 1H), 7.80 (d,  $J = 7.8$  Hz, 2H), 7.59 – 7.55 (m, 1H), 7.51 (t,  $J = 1.8$  Hz, 1H), 7.49-7.37 (m, 4H), 7.33 (d,  $J = 7.5$  Hz, 1H), 7.27 – 7.21 (m, 2H), 6.46 (dd,  $J = 7.1, 5.7$  Hz, 1H), 3.40 (dd,  $J = 16.9, 5.4$  Hz, 1H), 3.20 (dd,  $J = 16.9, 7.4$  Hz, 1H), 2.79 (s, 3H).  $^{13}\text{C}$  NMR (101 MHz,  $\text{CDCl}_3$ )  $\delta$  196.3, 169.0, 150.4, 146.7, 144.8, 138.5, 138.0, 136.2, 134.8, 133.9, 133.1, 131.6, 130.5, 130.5, 129.7, 129.4, 129.0, 128.2, 127.9, 126.3, 125.9, 121.6, 120.2, 59.0, 42.8, 17.5.

IR(KBr)  $\nu$  3065, 2921, 2851, 1692, 1598, 1503, 1475, 1400, 1211, 784, 689  $\text{cm}^{-1}$ .

HRMS (ESI): Calcd for  $\text{C}_{26}\text{H}_{20}\text{ClN}_2\text{O}_2$   $[\text{M}+\text{H}]^+$  427.1208, Found: 427.1211.

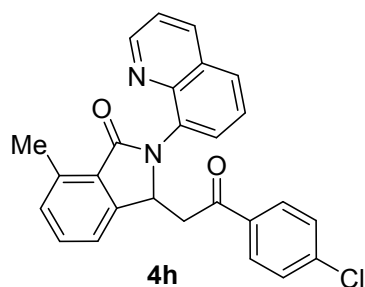

**3-(2-(4-chlorophenyl)-2-oxoethyl)-7-methyl-2-(quinolin-8-yl)isoindolin-1-one(4h).** The title compound was isolated as an off-white solid ( $R_f = 0.3$  EtOAc/PE 2:3), (eluent: EtOAc/PE: 1/3; 44.7 mg, 70%).  $^1\text{H}$  NMR (400 MHz,  $\text{CDCl}_3$ )  $\delta$  8.86 (dd,  $J = 4.2, 1.7$  Hz, 1H), 8.15 (dd,  $J = 8.3, 1.7$  Hz, 1H), 7.79 (d,  $J = 7.8$  Hz, 2H), 7.56 (t,  $J = 8.1$  Hz, 3H), 7.44 – 7.37 (m, 2H), 7.33 (d,  $J = 7.5$  Hz, 1H), 7.25 (dd,  $J = 6.8, 1.8$  Hz, 3H), 6.44 (dd,  $J = 7.4, 5.3$  Hz, 1H), 3.37 (dd,  $J = 17.0, 5.2$  Hz, 1H), 3.21 (dd,  $J = 17.0, 7.6$  Hz, 1H), 2.79 (s, 3H).  $^{13}\text{C}$  NMR (101 MHz,  $\text{CDCl}_3$ )  $\delta$  196.3, 169.0, 150.4, 146.8, 144.9, 139.7, 138.4, 136.3, 134.8, 134.0, 131.6, 130.5, 130.4, 129.4, 129.2, 129.0, 128.7, 128.2, 126.3, 121.6, 120.3, 59.0, 42.5, 17.5.

IR(KBr)  $\nu$  3050, 2920, 2856, 1688, 1591, 1502, 1475, 1401, 1203, 1087, 829, 793  $\text{cm}^{-1}$ .

HRMS (ESI): Calcd for  $\text{C}_{26}\text{H}_{20}\text{ClN}_2\text{O}_2$   $[\text{M}+\text{H}]^+$  427.1208, Found: 427.1212.

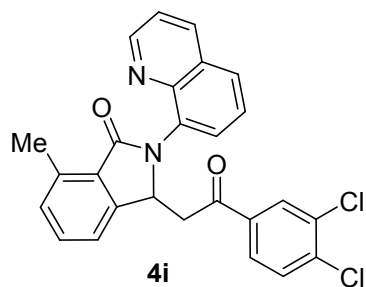

**3-(2-(3,4-dichlorophenyl)-2-oxoethyl)-7-methyl-2-(quinolin-8-yl)isoindolin-1-one(4i).** The title compound was isolated as an off-white solid ( $R_f = 0.3$  EtOAc/PE 2:3), (eluent: EtOAc/PE: 1/3; 31.7 mg, 46%).  $^1\text{H}$  NMR (400 MHz,  $\text{CDCl}_3$ )  $\delta$  8.85 (dd,  $J = 4.2, 1.7$  Hz, 1H), 8.14 (dd,  $J$

= 8.3, 1.6 Hz, 1H), 7.80 – 7.77 (m, 2H), 7.57 (dd,  $J = 10.1, 5.0$  Hz, 2H), 7.44 (t,  $J = 7.6$  Hz, 1H), 7.41 – 7.37 (m, 2H), 7.35 – 7.31 (m, 2H), 7.27 (d,  $J = 7.7$  Hz, 1H), 6.43 (t,  $J = 6.3$  Hz, 1H), 3.39 (dd,  $J = 16.7, 5.8$  Hz, 1H), 3.18 (dd,  $J = 16.7, 7.0$  Hz, 1H), 2.78 (s, 3H).  $^{13}\text{C}$  NMR (101 MHz,  $\text{CDCl}_3$ )  $\delta$  195.4, 168.9, 150.5, 146.5, 144.8, 138.6, 137.8, 136.26, 135.9, 133.8, 133.1, 131.7, 130.6, 130.5, 129.7, 129.4, 129.0, 128.2, 126.8, 126.32, 121.6, 120.1, 59.1, 42.7, 17.5.

IR(KBr)  $\nu$  3066, 2924, 2854, 1683, 1587, 1500, 1469, 1391, 1198, 1032, 783, 691  $\text{cm}^{-1}$ .

HRMS (ESI): Calcd for  $\text{C}_{26}\text{H}_{19}\text{Cl}_2\text{N}_2\text{O}_2$   $[\text{M}+\text{H}]^+$  461.0818, Found: 461.0817.

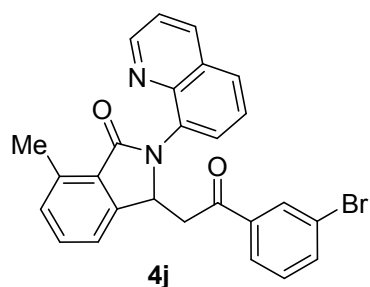

### **3-(2-(3-bromophenyl)-2-oxoethyl)-7-methyl-2-(quinolin-8-**

**yl)isoindolin-1-one(4j).** The title compound was isolated as an off-white solid ( $R_f = 0.2$  EtOAc/PE 2:3), (eluent: EtOAc/PE: 1/3; 36.0 mg, 51%).

$^1\text{H}$  NMR (400 MHz,  $\text{CDCl}_3$ )  $\delta$  8.86 (dd,  $J = 4.2, 1.7$  Hz, 1H), 8.15 (dd,  $J = 8.3, 1.7$  Hz, 1H), 7.79 (d,  $J = 7.8$  Hz, 2H), 7.65 (t,  $J = 1.7$  Hz, 1H), 7.56 (t,  $J = 7.8$  Hz, 2H), 7.51 (dd,  $J = 7.9, 1.2$  Hz, 1H), 7.44 (t,  $J = 7.6$  Hz, 1H), 7.38 (dd,  $J = 8.3, 4.2$  Hz, 1H), 7.33 (d,  $J = 7.5$  Hz, 1H), 7.26 (t,  $J = 3.7$  Hz, 1H), 7.16 (t,  $J = 7.9$  Hz, 1H), 6.47 – 6.45 (m, 1H), 3.39 (dd,  $J = 16.9, 5.5$



Hz, 1H), 3.20 (dd,  $J = 16.9, 7.2$  Hz, 1H), 2.79 (s, 3H).<sup>13</sup>C NMR (101 MHz, CDCl<sub>3</sub>)  $\delta$  196.2, 169.0, 150.4, 146.7, 144.8, 138.5, 138.1, 136.2, 136.0, 133.9, 131.6, 130.8, 130.5, 130.5, 130.0, 129.4, 129.0, 128.2, 126.3, 122.8, 121.6, 120.2, 59.0, 42.7, 17.5.

IR(KBr)  $\nu$  3062, 2952, 2920, 1684, 1600, 1502, 1473, 1400, 1200, 791, 680 cm<sup>-1</sup>.

HRMS (ESI): Calcd for C<sub>26</sub>H<sub>20</sub>BrN<sub>2</sub>O<sub>2</sub> [M+H]<sup>+</sup> 471.0703, Found: 471.0703.

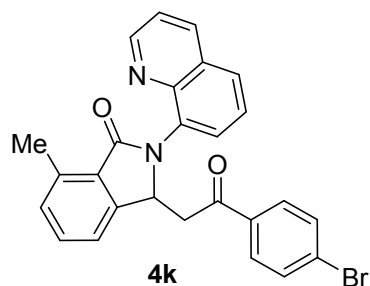

**3-(2-(4-bromophenyl)-2-oxoethyl)-7-methyl-2-(quinolin-8-**

**yl)isoindolin-1-one(4k).** The title compound was isolated as an off-white solid ( $R_f = 0.2$  EtOAc/PE 2:3), (eluent: EtOAc/PE: 1/3; 51.5 mg, 73%).

<sup>1</sup>H NMR (400 MHz, CDCl<sub>3</sub>)  $\delta$  8.86 (dd,  $J = 4.2, 1.7$  Hz, 1H), 8.15 (dd,  $J = 8.3, 1.7$  Hz, 1H), 7.79 (d,  $J = 7.8$  Hz, 2H), 7.56 (t,  $J = 7.8$  Hz, 1H), 7.48 – 7.37 (m, 6H), 7.33 (d,  $J = 7.5$  Hz, 1H), 7.27 – 7.25 (m, 1H), 6.44 (dd,  $J = 7.4, 5.3$  Hz, 1H), 3.37 (dd,  $J = 17.0, 5.2$  Hz, 1H), 3.20 (dd,  $J = 17.0, 7.6$  Hz, 1H), 2.79 (s, 3H).<sup>13</sup>C NMR (101 MHz, CDCl<sub>3</sub>)  $\delta$  196.5, 169.0, 150.4, 146.8, 144.9, 138.5, 136.3, 135.2, 133.9, 131.7, 131.6, 130.5, 130.4, 129.4, 129.3, 129.0, 128.4, 128.2, 126.3, 121.6, 120.3, 59.0, 42.5, 17.5.

IR(KBr)  $\nu$  3039, 2922, 2893, 1682, 1580, 1492, 1401, 1206, 833, 795,

695 cm<sup>-1</sup>.

HRMS (ESI): Calcd for C<sub>26</sub>H<sub>20</sub>BrN<sub>2</sub>O<sub>2</sub> [M+H]<sup>+</sup> 471.0703, Found: 471.0701.

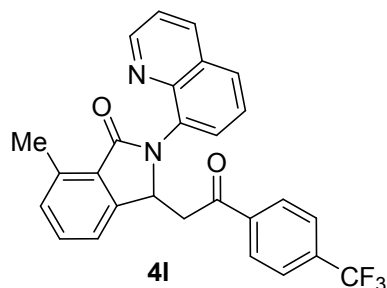

**7-methyl-3-(2-oxo-2-(4-(trifluoromethyl)phenyl)ethyl)-2-(quinolin-8-yl)isoindolin-1-one(4I).** The title compound was isolated as an off-white solid ( $R_f = 0.3$  EtOAc/PE 2:3), (eluent: EtOAc/PE: 1/3; 24.2 mg, 35%). <sup>1</sup>H NMR (600 MHz, CDCl<sub>3</sub>)  $\delta$  8.84 (dd,  $J = 3.9, 1.3$  Hz, 1H), 8.13 (d,  $J = 7.9$  Hz, 1H), 7.80 – 7.78 (m, 2H), 7.67 (d,  $J = 8.2$  Hz, 2H), 7.57 (d,  $J = 7.8$  Hz, 1H), 7.54 (d,  $J = 8.3$  Hz, 2H), 7.44 (t,  $J = 7.6$  Hz, 1H), 7.38 (dd,  $J = 8.2, 4.1$  Hz, 1H), 7.34 (d,  $J = 7.6$  Hz, 1H), 7.27 (d,  $J = 7.6$  Hz, 1H), 6.45 (t,  $J = 6.3$  Hz, 1H), 3.45 (dd,  $J = 17.0, 5.5$  Hz, 1H), 3.27 (dd,  $J = 17.0, 7.2$  Hz, 1H), 2.79 (s, 3H). <sup>13</sup>C NMR (101 MHz, CDCl<sub>3</sub>)  $\delta$  196.7, 169.0, 150.4, 146.6, 139.0, 138.6, 136.3, 134.6, 134.2, 133.9, 131.7, 130.6, 130.5, 129.4, 129.0, 128.2, 128.1, 126.3, 125.5 (d,  $J = 3.7$  Hz), 124.8 (CF<sub>3</sub>), 122.1 (CF<sub>3</sub>), 121.6, 120.2, 59.0, 42.9, 17.5.

IR(KBr)  $\nu$  3040, 2922, 2851, 1689, 1406, 1329, 1163, 1135, 1065, 840, 796, 693 cm<sup>-1</sup>.

HRMS (ESI): Calcd for C<sub>27</sub>H<sub>20</sub>F<sub>3</sub>N<sub>2</sub>O<sub>2</sub> [M+H]<sup>+</sup> 461.1471, Found:

461.1470.

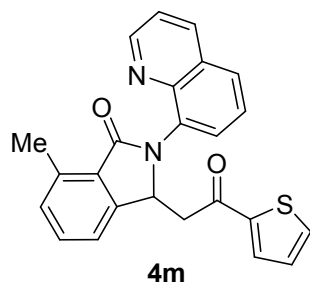

**7-methyl-3-(2-oxo-2-(thiophen-2-yl)ethyl)-2-(quinolin-8-yl)isoindolin-1-one(4m).** The title compound was isolated as an off-white solid ( $R_f = 0.4$  EtOAc/PE 1:1), (eluent: EtOAc/PE: 1/3; 37.0 mg, 62%).  $^1\text{H}$  NMR (600 MHz,  $\text{CDCl}_3$ )  $\delta$  8.88 (dd,  $J = 4.1, 1.7$  Hz, 1H), 8.15 (dd,  $J = 8.3, 1.7$  Hz, 1H), 7.81-7.78 (m, 2H), 7.55 (dd,  $J = 8.2, 7.4$  Hz, 1H), 7.52 (dd,  $J = 4.9, 1.1$  Hz, 1H), 7.42 (t,  $J = 7.6$  Hz, 1H), 7.39 (dd,  $J = 8.3, 4.1$  Hz, 1H), 7.36 – 7.34 (m, 2H), 7.26 – 7.25 (m, 1H), 6.94 (dd,  $J = 4.9, 3.9$  Hz, 1H), 6.44 (dd,  $J = 7.6, 5.4$  Hz, 1H), 3.32 (dd,  $J = 16.4, 5.3$  Hz, 1H), 3.16 (dd,  $J = 16.4, 7.7$  Hz, 1H), 2.79 (s, 3H).  $^{13}\text{C}$  NMR (101 MHz,  $\text{CDCl}_3$ )  $\delta$  190.0, 169.0, 150.4, 146.7, 144.9, 143.9, 138.4, 136.3, 134.2, 133.9, 132.1, 131.6, 130.4, 130.4, 129.4, 129.0, 128.2, 128.0, 126.2, 121.6, 120.4, 59.0, 43.1, 17.6.

IR(KBr)  $\nu$  3085, 2914, 2850, 1687, 1647, 1599, 1499, 1476, 1402, 1204, 1159, 788, 732  $\text{cm}^{-1}$ .

HRMS (ESI): Calcd for  $\text{C}_{24}\text{H}_{19}\text{N}_2\text{O}_2\text{S}$   $[\text{M}+\text{H}]^+$  399.1162, Found: 399.1167.

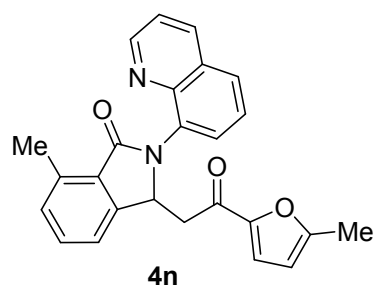

**7-methyl-3-(2-(5-methylfuran-2-yl)-2-oxoethyl)-2-(quinolin-8-yl)isoindolin-1-one(4n).** The title compound was isolated as an off-white solid ( $R_f = 0.4$  EtOAc/PE 1:1), (eluent: EtOAc/PE: 1/3; 30.3 mg, 51%).  $^1\text{H}$  NMR (400 MHz,  $\text{CDCl}_3$ )  $\delta$  8.88 (dd,  $J = 4.2, 1.7$  Hz, 1H), 8.16 (dd,  $J = 8.3, 1.6$  Hz, 1H), 7.81 – 7.78 (m, 2H), 7.56 (dd,  $J = 8.2, 7.4$  Hz, 1H), 7.43 – 7.38 (m, 2H), 7.33 (d,  $J = 7.5$  Hz, 1H), 7.24 (d,  $J = 7.5$  Hz, 1H), 6.79 (d,  $J = 3.4$  Hz, 1H), 6.42 (dd,  $J = 7.6, 5.7$  Hz, 1H), 5.99 (dd,  $J = 3.5, 0.8$  Hz, 1H), 3.18 (dd,  $J = 16.1, 5.5$  Hz, 1H), 3.03 (dd,  $J = 16.1, 7.8$  Hz, 1H), 2.78 (s, 3H), 2.26 (s, 3H).  $^{13}\text{C}$  NMR (101 MHz,  $\text{CDCl}_3$ )  $\delta$  185.2, 169.0, 158.0, 151.1, 150.3, 146.8, 144.9, 138.3, 136.2, 133.9, 131.5, 130.4, 130.4, 129.4, 129.0, 128.0, 126.2, 121.5, 120.4, 119.4, 109.0, 58.9, 42.0, 17.5, 14.0.

IR(KBr)  $\nu$  3109, 2922, 1672, 1603, 1509, 1400, 1213, 1045, 822, 787, 689  $\text{cm}^{-1}$ .

HRMS (ESI): Calcd for  $\text{C}_{25}\text{H}_{21}\text{N}_2\text{O}_3$   $[\text{M}+\text{H}]^+$  397.1547, Found: 397.1543.

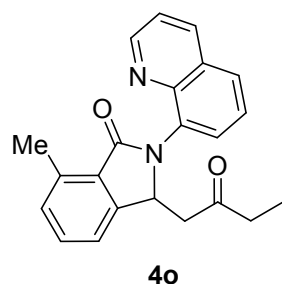

**7-methyl-3-(2-oxobutyl)-2-(quinolin-8-yl)isoindolin-1-one(4o).** The title compound was isolated as an off-white solid ( $R_f = 0.2$  EtOAc/PE 2:3), (eluent: EtOAc/PE: 1/3; 19.1 mg, 37%).  $^1\text{H}$  NMR (400 MHz,  $\text{CDCl}_3$ )  $\delta$  8.90 (dd,  $J = 4.2, 1.7$  Hz, 1H), 8.20 (dd,  $J = 8.3, 1.7$  Hz, 1H), 7.86-7.80 (m, 2H), 7.64 – 7.61 (m, 1H), 7.46 – 7.42 (m, 2H), 7.27 (dd,  $J = 12.8, 7.2$  Hz, 2H), 6.27 (dd,  $J = 7.7, 5.2$  Hz, 1H), 2.83 (dd,  $J = 17.0, 5.1$  Hz, 1H), 2.77 (s, 3H), 2.69 (dd,  $J = 17.0, 7.8$  Hz, 1H), 2.21-2.06 (m, 2H), 0.79 (t,  $J = 7.3$  Hz, 3H).  $^{13}\text{C}$  NMR (101 MHz,  $\text{CDCl}_3$ )  $\delta$  208.5, 169.0, 150.5, 146.9, 144.9, 138.4, 136.3, 134.0, 131.6, 130.4, 130.3, 129.4, 129.0, 128.1, 126.3, 121.6, 120.7, 58.5, 46.0, 36.7, 17.5, 7.3. IR(KBr)  $\nu$  3041, 2925, 1694, 1597, 1498, 1473, 1399, 1197, 795, 693, 622  $\text{cm}^{-1}$ . HRMS (ESI): Calcd for  $\text{C}_{22}\text{H}_{21}\text{N}_2\text{O}_2$   $[\text{M}+\text{H}]^+$  345.1598, Found: 345.1599.

## 5. Removal of the directing group

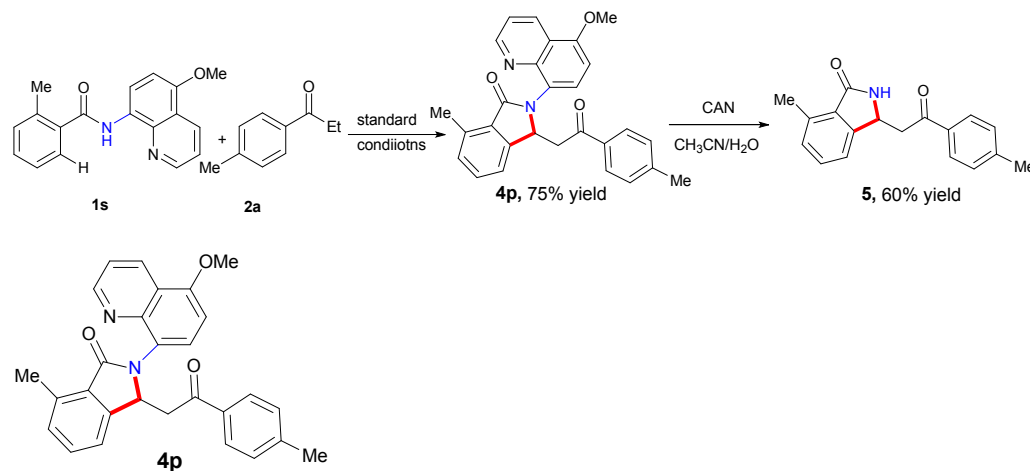

### 2-(5-methoxyquinolin-8-yl)-7-methyl-3-(2-oxo-2-(p-

tolyl)ethyl)isoindolin-1-one(**4p**). The title compound was isolated as an

off-white solid ( $R_f = 0.2$  EtOAc/PE 2:3), (eluent: EtOAc/PE: 1/3; 49.0 mg,

75%).  $^1\text{H}$  NMR (600 MHz,  $\text{CDCl}_3$ )  $\delta$  8.86 (dd,  $J = 4.1, 1.6$  Hz, 1H), 8.54

(dd,  $J = 8.4, 1.6$  Hz, 1H), 7.66 (d,  $J = 8.2$  Hz, 1H), 7.54 (d,  $J = 8.2$  Hz,

2H), 7.40 (t,  $J = 7.6$  Hz, 1H), 7.36 (dd,  $J = 8.4, 4.2$  Hz, 1H), 7.33 (d,  $J =$

7.6 Hz, 1H), 7.23 (d,  $J = 7.5$  Hz, 1H), 7.09 (d,  $J = 8.1$  Hz, 2H), 6.84 (d,  $J =$

8.2 Hz, 1H), 6.27 (dd,  $J = 7.6, 5.0$  Hz, 1H), 3.99 (s, 3H), 3.39 (dd,  $J =$

16.9, 5.0 Hz, 1H), 3.22 (dd,  $J = 16.9, 8.0$  Hz, 1H), 2.78 (s, 3H), 2.33 (s,

3H).  $^{13}\text{C}$  NMR (101 MHz,  $\text{CDCl}_3$ )  $\delta$  197.3, 169.4, 155.1, 150.7, 147.1,

145.5, 144.0, 138.2, 134.2, 131.4, 131.1, 130.7, 130.3, 129.1, 129.1,

128.0, 126.4, 121.6, 120.6, 120.4, 103.8, 59.1, 55.9, 42.3, 21.6, 17.5.

IR(KBr)  $\nu$  3130, 1690, 1605, 1593, 1477, 1401, 1272, 1203, 809, 785,

692  $\text{cm}^{-1}$ .

HRMS (ESI): Calcd for  $\text{C}_{28}\text{H}_{24}\text{N}_2\text{O}_3$   $[\text{M}+\text{H}]^+$  437.1860, Found: 437.1862.

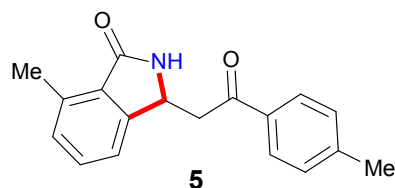

**7-methyl-3-(2-oxo-2-(p-tolyl)ethyl)isoindolin-1-one(5).** According to the literature,<sup>3</sup> to a solution of **4p** (87.4 mg, 0.2 mmol) in MeCN (2.0 mL) at RT was added solution of CAN (Cerium Diammonium Nitrate ) (438 mg, 0.8 mmol, 4 equiv) in H<sub>2</sub>O (2.0 mL). Resulting solution was stirred at 40 °C for 5 h, H<sub>2</sub>O (15 mL) was added and the reaction mixture was extracted with EtOAc (3 x 15 mL). Combined organic phase was washed with 10% Na<sub>2</sub>SO<sub>3</sub> solution (2 x 15 mL) and brine (15 mL), dried over MgSO<sub>4</sub>, filtered, solvent was evaporated. After column chromatography (eluent: EtOAc/PE: 1/4; 34.0 mg; 60%) of an off-white solid was obtained. <sup>1</sup>H NMR (400 MHz, CDCl<sub>3</sub>) δ 7.85 (d, *J* = 8.2 Hz, 2H), 7.44 (t, *J* = 7.6 Hz, 1H), 7.28 – 7.25 (m, 3H), 7.22 (d, *J* = 7.5 Hz, 1H), 6.77 (s, 1H), 5.05 (d, *J* = 8.7 Hz, 1H), 3.66 (dd, *J* = 18.0, 3.0 Hz, 1H), 3.04 (dd, *J* = 18.0, 10.4 Hz, 1H), 2.73 (s, 3H), 2.42 (s, 3H). <sup>13</sup>C NMR (101 MHz, CDCl<sub>3</sub>) δ 197.7, 170.9, 147.2, 144.8, 138.4, 133.7, 131.5, 130.4, 129.5, 129.0, 128.2, 119.6, 51.7, 44.3, 21.7, 17.3.

IR(KBr) ν 3196, 3089, 2920, 1703, 1679, 1605, 1407, 1374, 1314, 1205, 802, 783 cm<sup>-1</sup>.

HRMS (ESI): Calcd for C<sub>18</sub>H<sub>17</sub>NO<sub>2</sub> [M+H]<sup>+</sup> 280.1332, Found: 280.1332.

## 6. Experimental procedures of mechanistic studies

### (1) Cobalt-Catalyzed H/D Exchange in **1b** with CD<sub>3</sub>OD

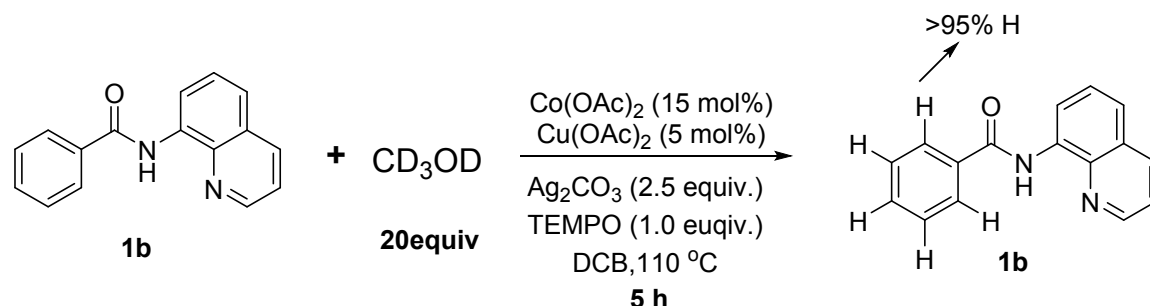

In a glove box, a 25 mL Schlenk tube equipped with a stir bar was charged with **1b** (49.6mg, 0.2 mmol), Co(OAc)<sub>2</sub> (5.5 mg, 15 mol%), Ag<sub>2</sub>CO<sub>3</sub> (138.0 mg, 2.5 equiv.), Cu(OAc)<sub>2</sub> (1.9 mg, 5 mol%), TEMPO (31.3 mg, 1.0 equiv.). The tube was fitted with a rubber septum, and removed out from the glove box. Then CD<sub>3</sub>OD (20 equiv.) was added through the rubber septum using syringe under the atmosphere of N<sub>2</sub>. 1,2-Dichlorobenzene (1.0 mL) was added to the Schlenk tube through the rubber septum using a syringe. The septum was replaced by a Teflon screwcap under N<sub>2</sub> flow. The reaction mixture was stirred at 110 °C (pre-heated to 110 °C) for 5 h. After cooling down, the solvent was removed in vacuo and the residue was purified by chromatography on silica gel (eluent: EtOAc/PE) to provide the corresponding product, and then analyzed by NMR.



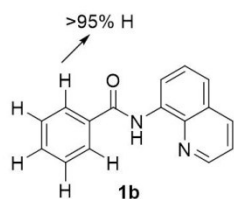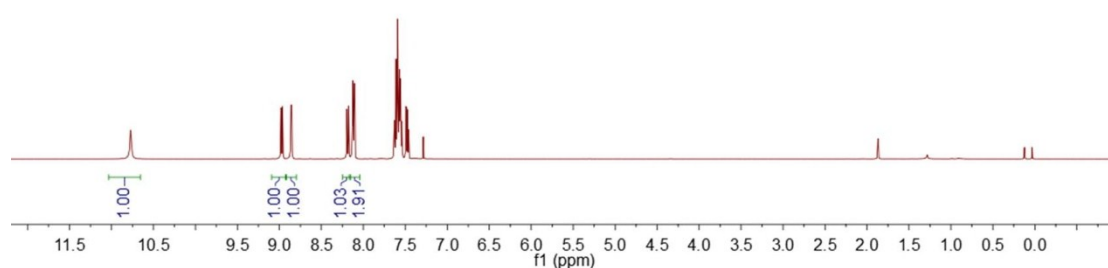

## (2) Cobalt-Catalyzed H/D Exchange in **1b**-[D] with CH<sub>3</sub>OH

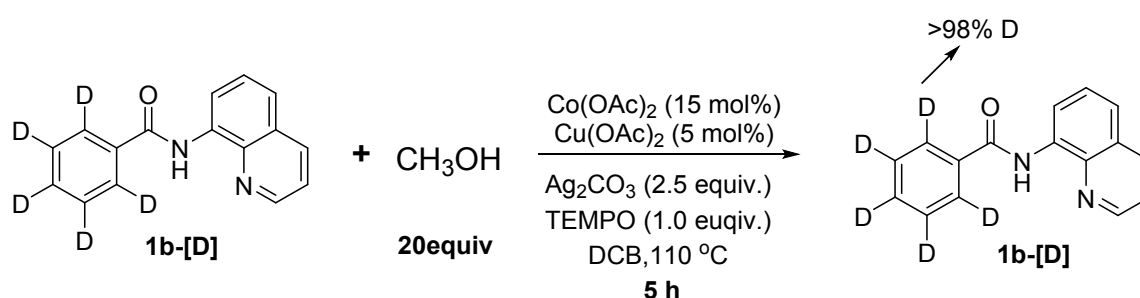

In a glove box, a 25 mL Schlenk tube equipped with a stir bar was charged with **1b**-[D] (50.6mg, 0.2 mmol), Co(OAc)<sub>2</sub> (5.5 mg, 15 mol%), Ag<sub>2</sub>CO<sub>3</sub> (138.0 mg, 2.5 equiv.), Cu(OAc)<sub>2</sub> (1.9 mg, 5 mol%), TEMPO (31.3 mg, 1.0 equiv.). The tube was fitted with a rubber septum, and removed out from the glove box. Then CH<sub>3</sub>OH (20 equiv.) was added through the rubber septum using a syringe under the atmosphere of N<sub>2</sub>. 1,2-Dichlorobenzene (1.0 mL) was added to the Schlenk tube through the rubber septum using syringe. The septum was replaced by a Teflon

screwcap under N<sub>2</sub> flow. The reaction mixture was stirred at 110 °C (pre-heated to 110 °C) for 5 h. After cooling down, the solvent was removed in vacuo and the residue was purified by chromatography on silica gel (eluent: EtOAc/PE) to provide the corresponding product, and then analyzed by NMR.

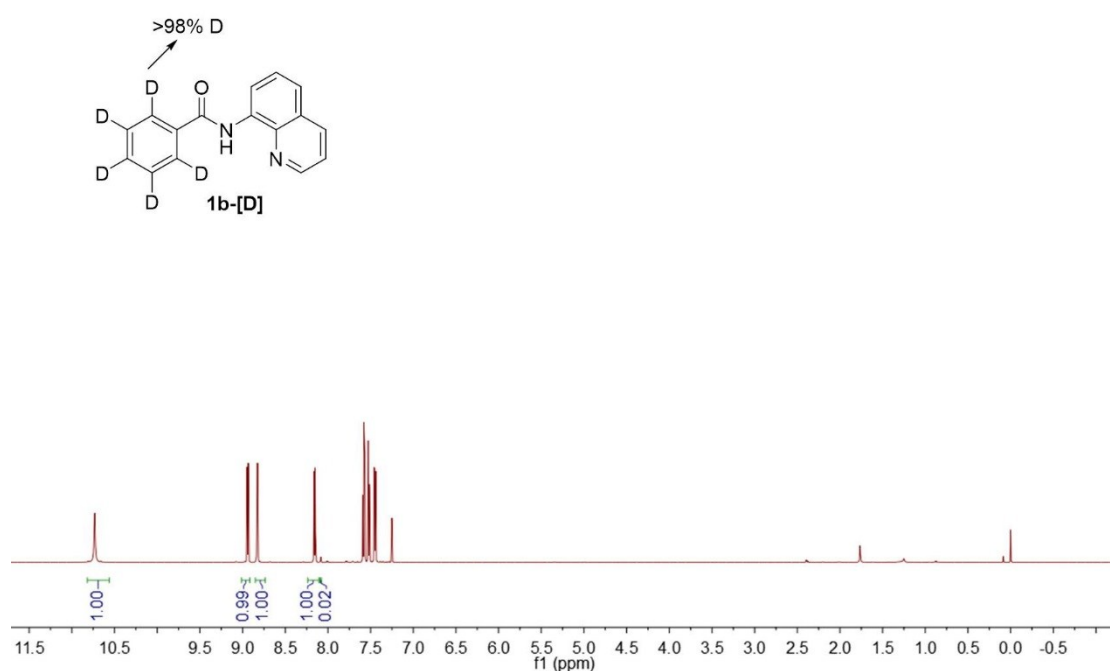

### (3) Studies on the Kinetic Isotope Effect.

#### a. Parallel reactions.

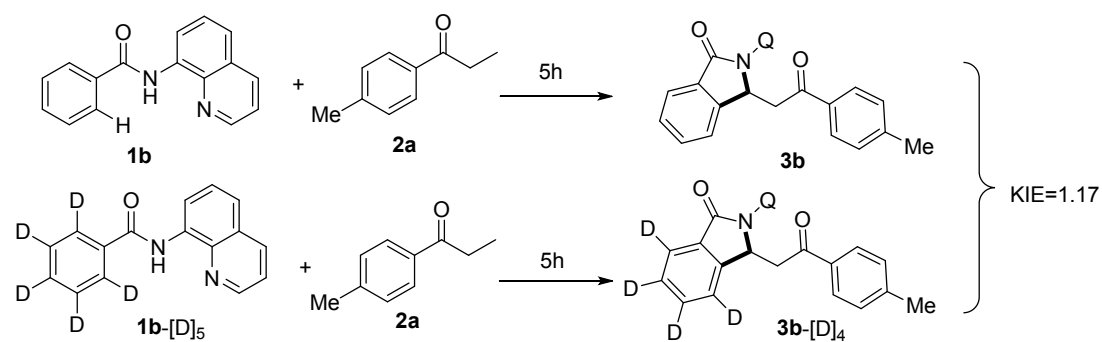

In a glove box, two 25 mL Schlenk tubes equipped with stir bars were

separately added **1b** (49.6 mg, 0.2 mmol), and **1b**-[D]<sub>5</sub> (50.6mg, 0.2 mmol). Co(OAc)<sub>2</sub> (5.5 mg, 15 mol%), Ag<sub>2</sub>CO<sub>3</sub> (138.0 mg, 2.5 equiv.), Cu(OAc)<sub>2</sub> (1.9 mg, 5 mol%), TEMPO (31.3 mg, 1.0 equiv.), respectively. The tube was separately fitted with a rubber septum, and removed out from the glove box. Then ketone **2a** (3.5 equiv.) were separately added through the rubber septum using a syringe under the atmosphere of N<sub>2</sub>. 1,2-Dichlorobenzene (1.0 mL) was separately added to the Schlenk tube through the rubber septum using syringe. The septum was replaced by a Teflon screwcap under N<sub>2</sub> flow. The reaction mixture was stirred at 110 °C (pre-heated to 110 °C) for 5 h. After cooling down, the reaction mixture of the two parallel tubes was mixed together. Then the solvent was removed in vacuo and the residue was purified by chromatography on silica gel (eluent: EtOAc/PE) to provide the corresponding products (**3b** and **3b**-d<sub>4</sub>), and then analyzed by NMR.

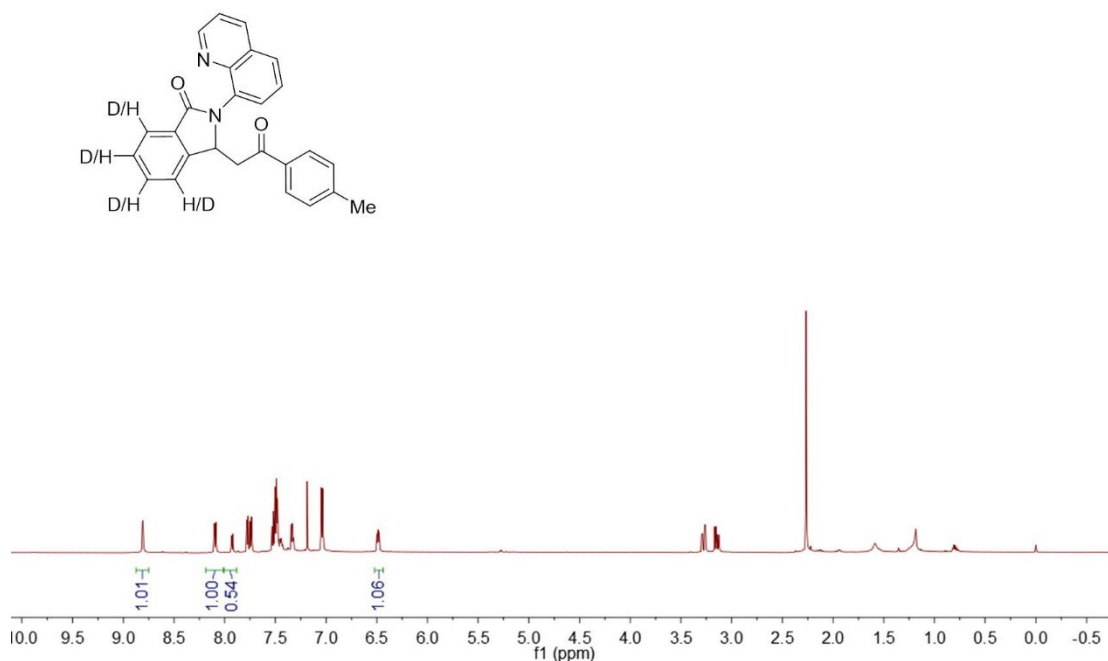

### b. Competitive reaction.

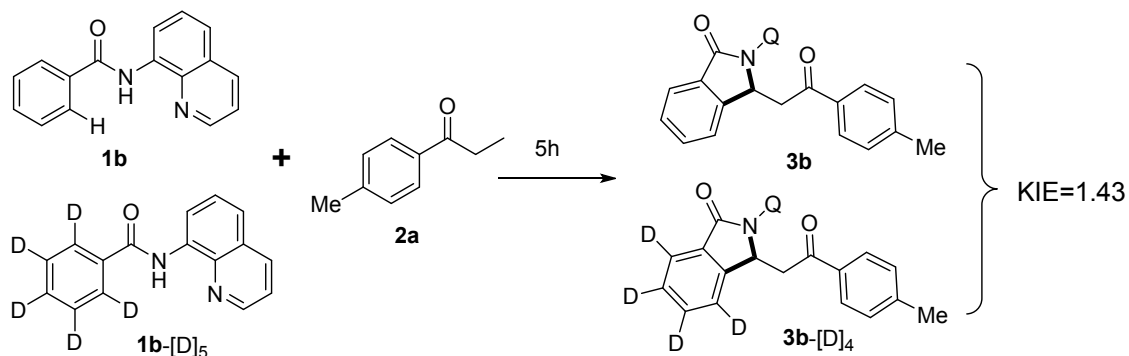

In a glove box, a 25 mL Schlenk tube equipped with a stir bar was charged with **1b** (24.8mg, 0.1 mmol), and **1b**-[D]<sub>5</sub> (25.3mg, 0.1 mmol), Co(OAc)<sub>2</sub> (5.5 mg, 15 mol%), Ag<sub>2</sub>CO<sub>3</sub> (138.0 mg, 2.5 equiv.), Cu(OAc)<sub>2</sub> (1.9 mg, 5 mol%), TEMPO (31.3 mg, 1.0 equiv.). The tube was fitted with a rubber septum, and removed out from the glove box. Then ketone **2a** (3.5 equiv.) was added through the rubber septum using syringe under

the atmosphere of N<sub>2</sub>. 1,2-Dichlorobenzene (1.0 mL) was added to the Schlenk tube through the rubber septum using a syringe. The septum was replaced by a Teflon screwcap under N<sub>2</sub> flow. The reaction mixture was stirred at 110 °C (pre-heated to 110 °C) for 5 h. After cooling down, the solvent was removed in vacuo and the residue was purified by chromatography on silica gel (eluent: EtOAc/PE) to provide the corresponding products (**3b** and **3b-d<sub>4</sub>**), and then analyzed by NMR.

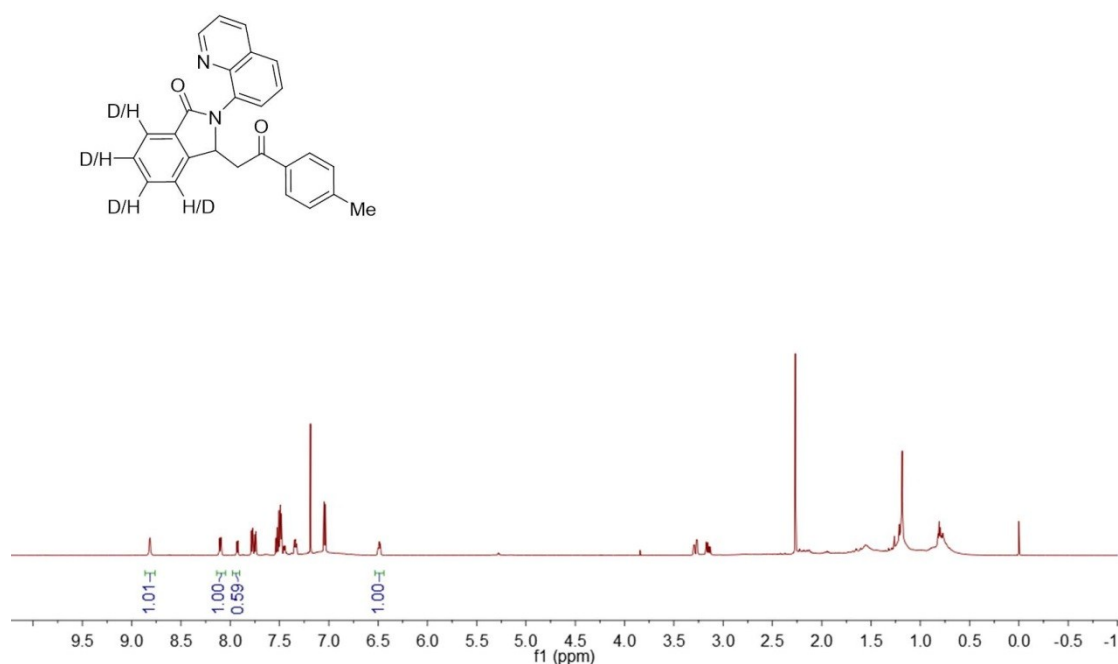

#### (4) Control experiments about the desaturation of ethyl ketones

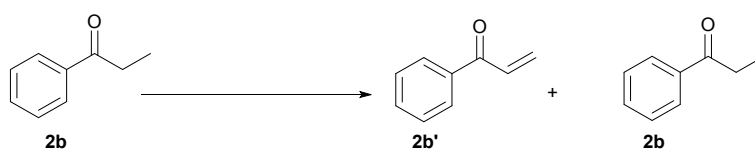

In a glove box, a 25 mL Schlenk tube equipped with a stir bar was charged with Co(OAc)<sub>2</sub> (15 mol%), Ag<sub>2</sub>CO<sub>3</sub> (2.5 equiv.), Cu(OAc)<sub>2</sub> (5 mol%), TEMPO (1.0 equiv.). The tube was fitted with a rubber septum,

and removed out from the glove box. Then ketone **2b** (0.2 mmol) was added through the rubber septum using syringe under the atmosphere of N<sub>2</sub>. 1,2-Dichlorobenzene (0.75 mL) was added to the Schlenk tube through the rubber septum using a syringe. The septum was replaced by a Teflon screwcap under N<sub>2</sub> flow. The reaction mixture was stirred at 110 °C (pre-heated to 110 °C) for 21h. After cooling down, the solvent was removed in vacuo and the residue was analyzed by GC-Mass. There is no other compound produced except for **2b'**. The yields of **2b'** and **2b** were determined by GC.

**Table S9:** Control experiments about the dehydrogenation of ketone **2b**.

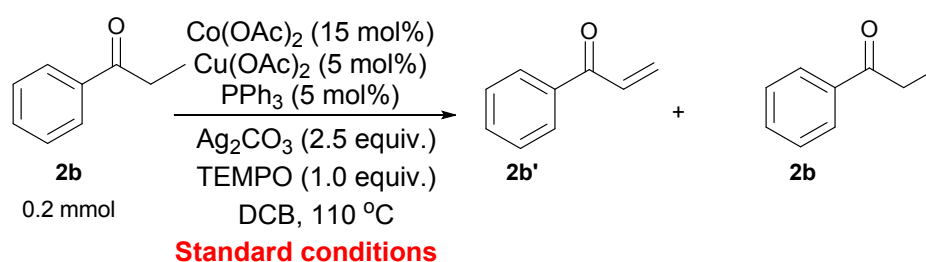

| Entry | Conditions                                                                        | <b>2b'</b> (GC yield) | <b>2b</b> (GC yield) |
|-------|-----------------------------------------------------------------------------------|-----------------------|----------------------|
| 1     | Standard conditions                                                               | 68%                   | 32%                  |
| 2     | Without Co(OAc) <sub>2</sub>                                                      | 67%                   | 33%                  |
| 3     | Without Co(OAc) <sub>2</sub> , PPh <sub>3</sub>                                   | 40%                   | 60%                  |
| 4     | Without Co(OAc) <sub>2</sub> , TEMPO                                              | No observed           | 100%                 |
| 5     | Without Co(OAc) <sub>2</sub> , Ag <sub>2</sub> CO <sub>3</sub>                    | 23%                   | 77%                  |
| 6     | Without Co(OAc) <sub>2</sub> , Ag <sub>2</sub> CO <sub>3</sub> , PPh <sub>3</sub> | 14%                   | 86%                  |
| 7     | Without Cu(OAc) <sub>2</sub>                                                      | 7%                    | 93%                  |

### (5) The reaction of **2b'** with amide **1a**.

In a glove box, a 25 mL Schlenk tube equipped with a stir bar was charged with **1a** (0.15 mmol), Co(OAc)<sub>2</sub> (4.1 mg, 15 mol%), Ag<sub>2</sub>CO<sub>3</sub> (103.5 mg, 2.5 equiv.), Cu(OAc)<sub>2</sub> (1.4 mg, 5 mol%), P(Ph)<sub>3</sub> (2.0 mg, 5 mol%), TEMPO (23.5 mg, 1.0 equiv.). The tube was fitted with a rubber septum, and removed out from the glove box. Then **2b'** which was prepared according to literatures<sup>2</sup> (3.5 equiv.) was added through the rubber septum using syringe under the atmosphere of N<sub>2</sub>. 1,2-Dichlorobenzene (0.75 mL) was added to the Schlenk tube through the rubber septum using a syringe. The septum was replaced by a Teflon screwcap under N<sub>2</sub> flow. The reaction mixture was stirred at 110 °C (pre-heated to 110 °C) for 21 h. After cooling down, the solvent was removed in vacuo and the residue was purified by chromatography on silica gel (eluent: EtOAc/PE) to provide the corresponding product.

#### Reaction with standard conditions:

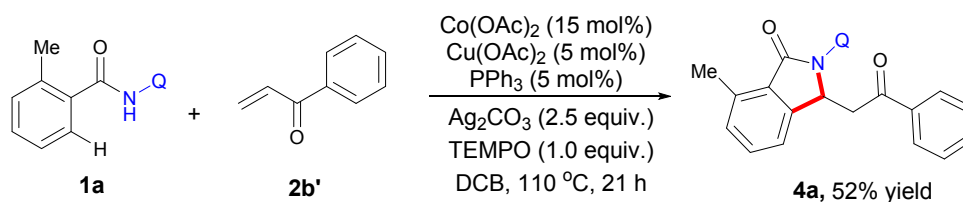

#### Reaction with conditions without Cu(OAc)<sub>2</sub> and TEMPO:

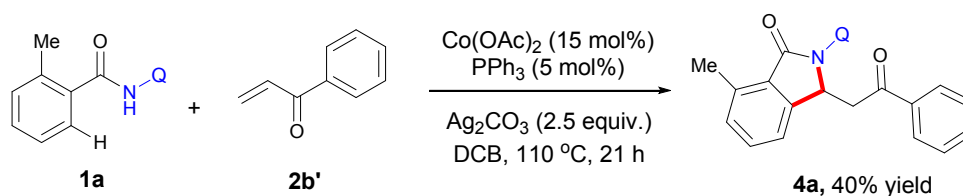

## 7. Reference

1. (a) Ano, Y.; Tobisu, M.; Chatani, N. *Org. Lett.* **2012**, *14*, 354. (b) Shibata, K.; Chatani, N. *Org. Lett.* **2014**, *16*, 5148.
2. Ma, T.; Fu, X.; Kee, C. W.; Zong, L.; Pan, Y.; Huang, K.-W.; Tan, C.-H. *J. Am. Chem. Soc.* **2011**, *133*, 2828.
3. He, G.; Zhang, S. Y.; Nack, W. A.; Li, Q.; Chen, G., *Angew. Chem. Int. Ed.* **2013**, *52*, 1112



## 8. $^1\text{H}$ and $^{13}\text{C}$ NMR spectra

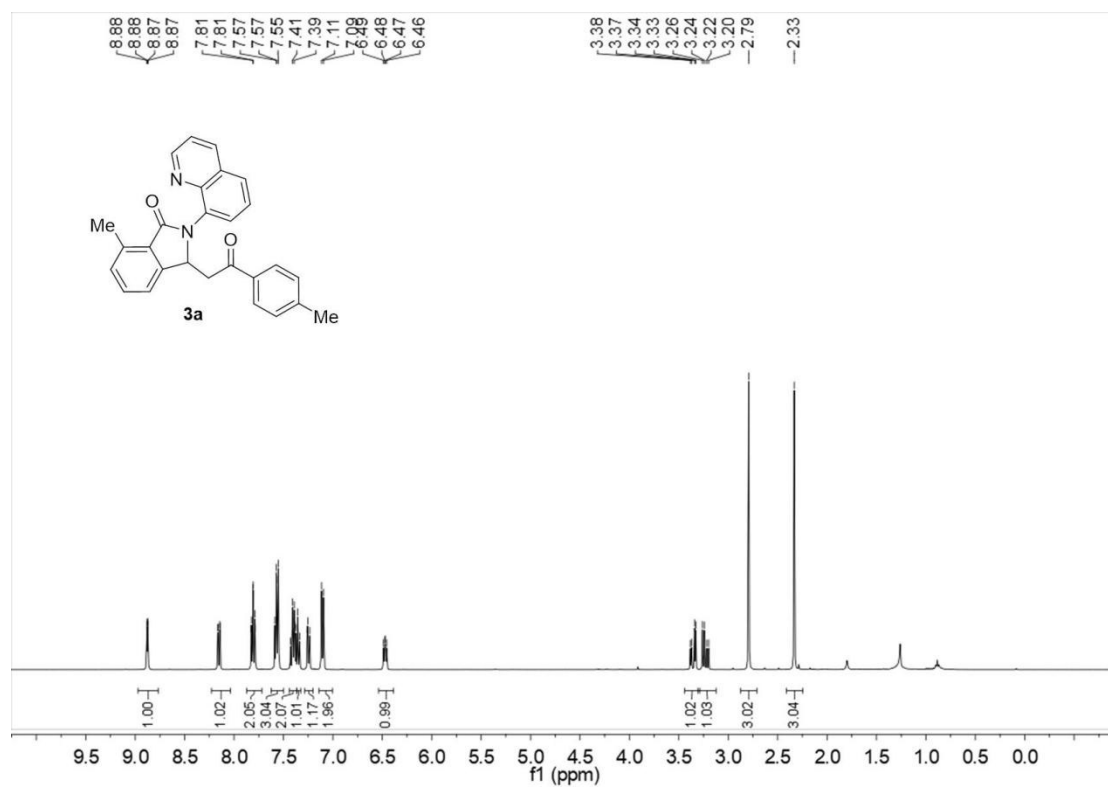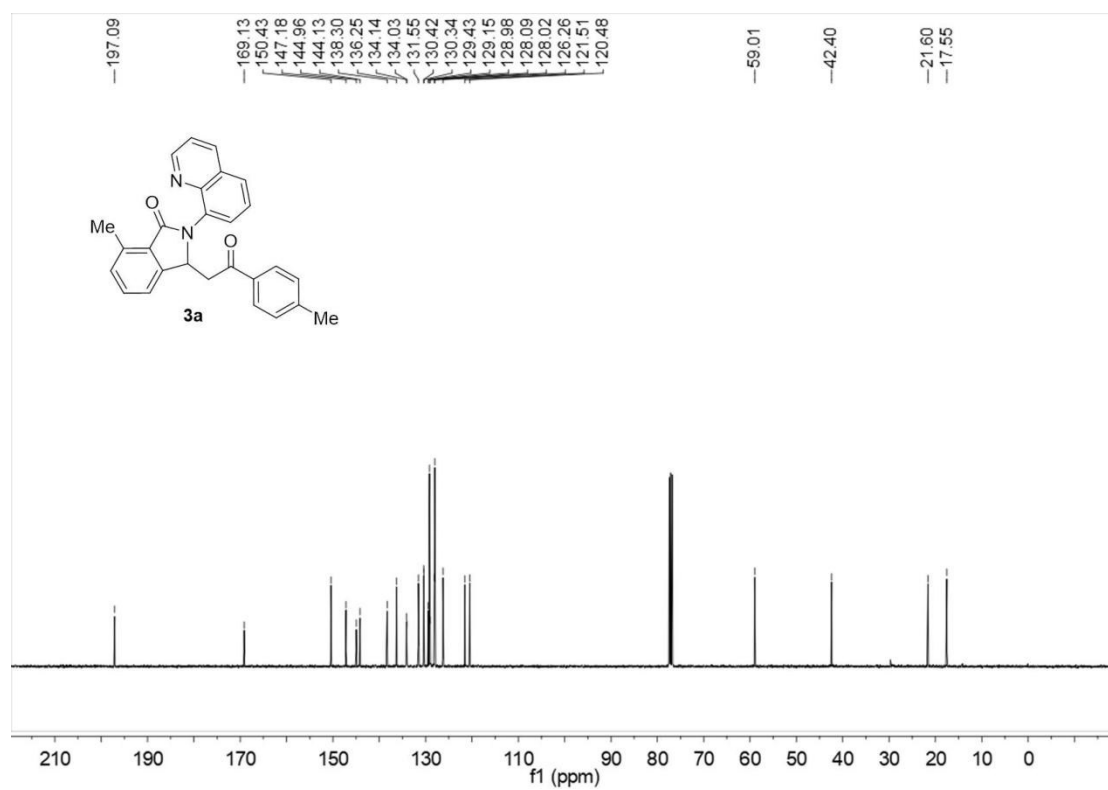

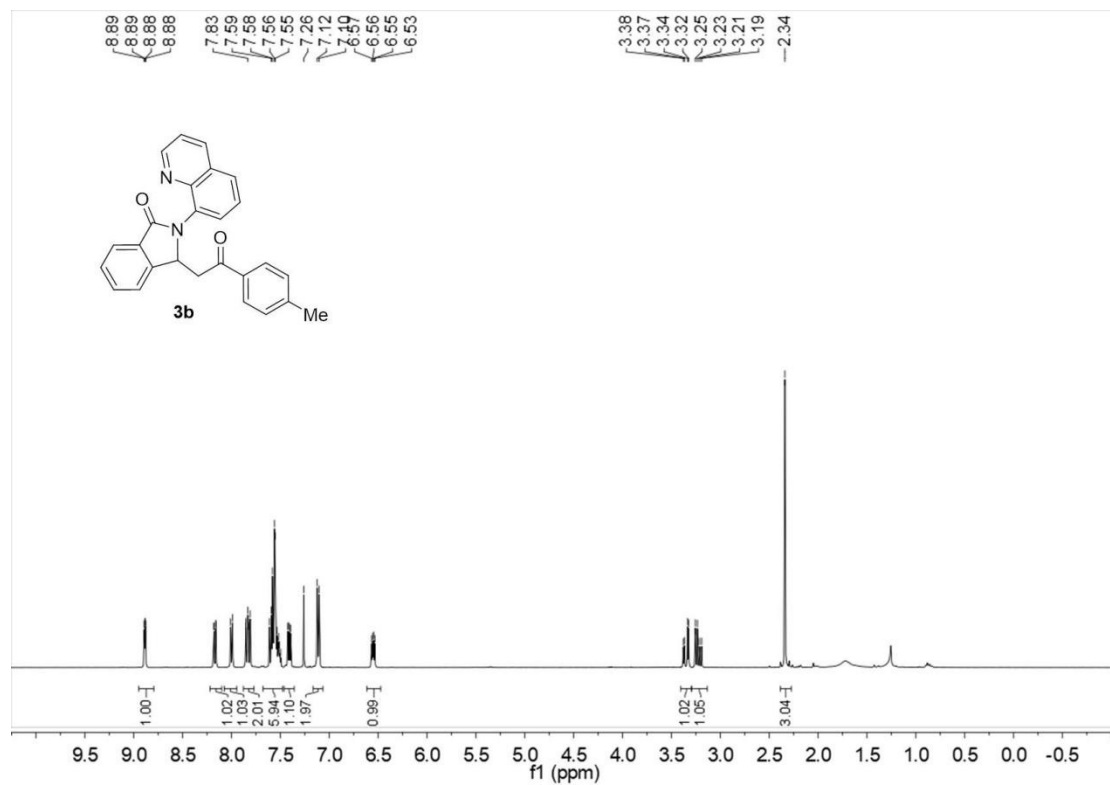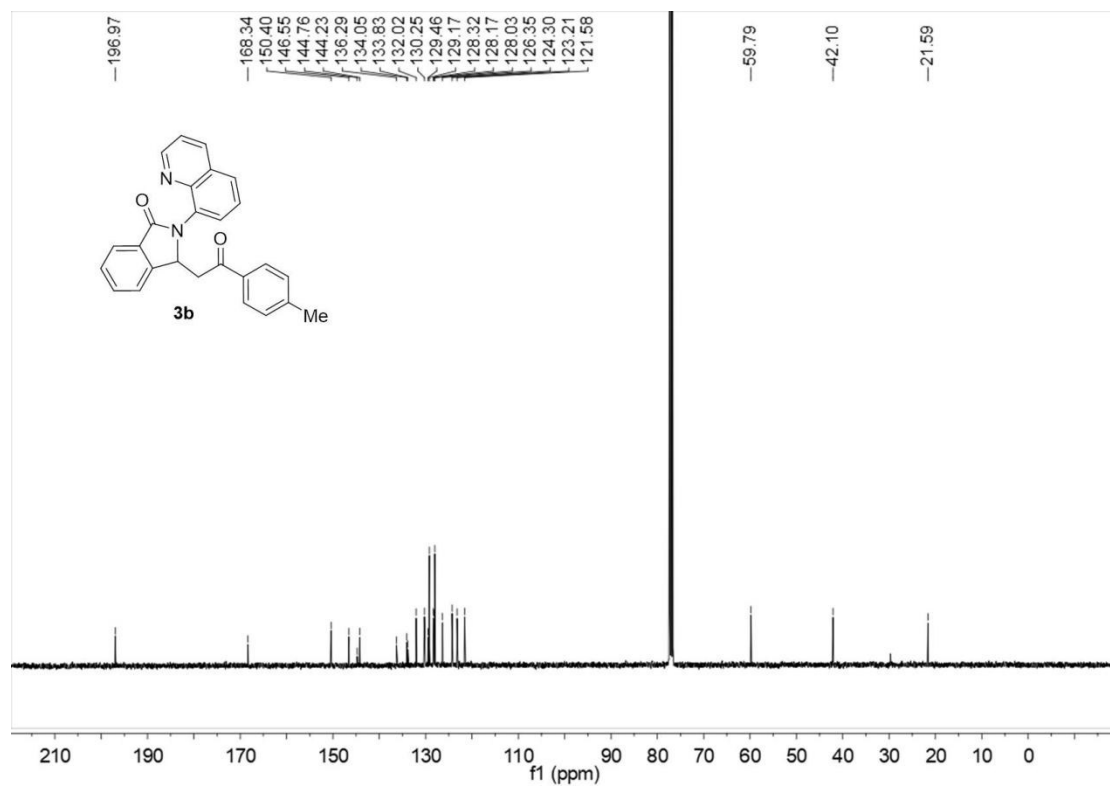

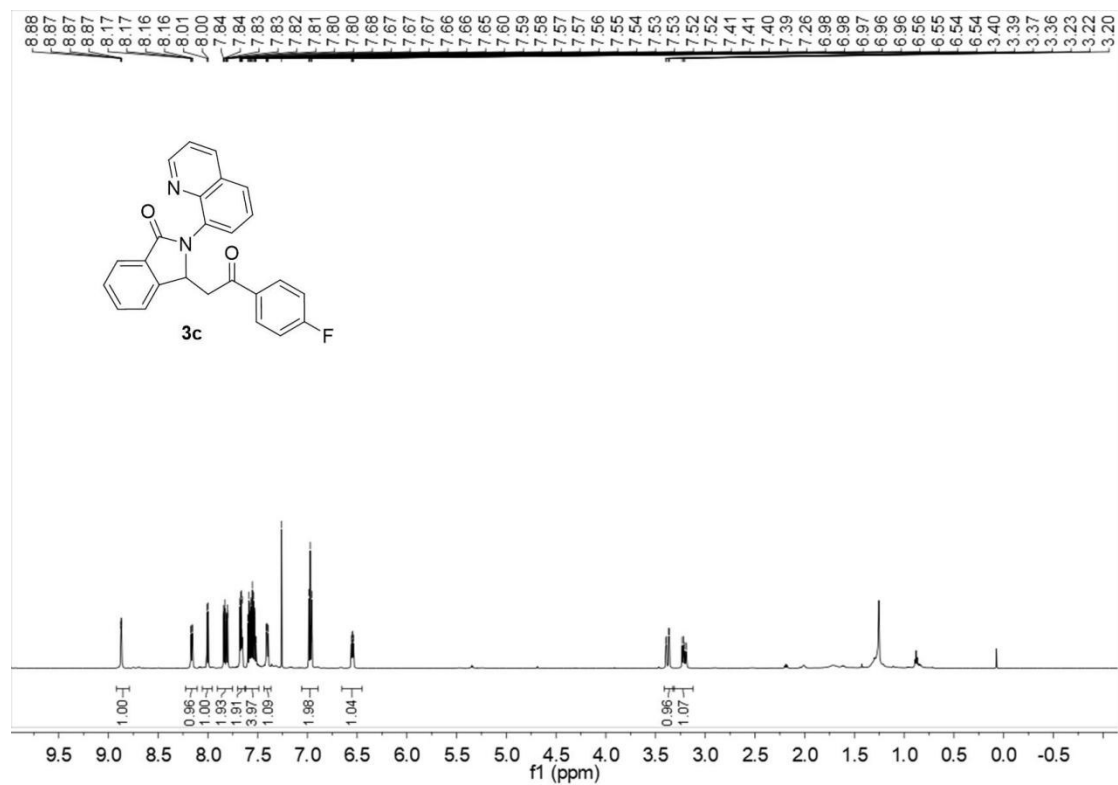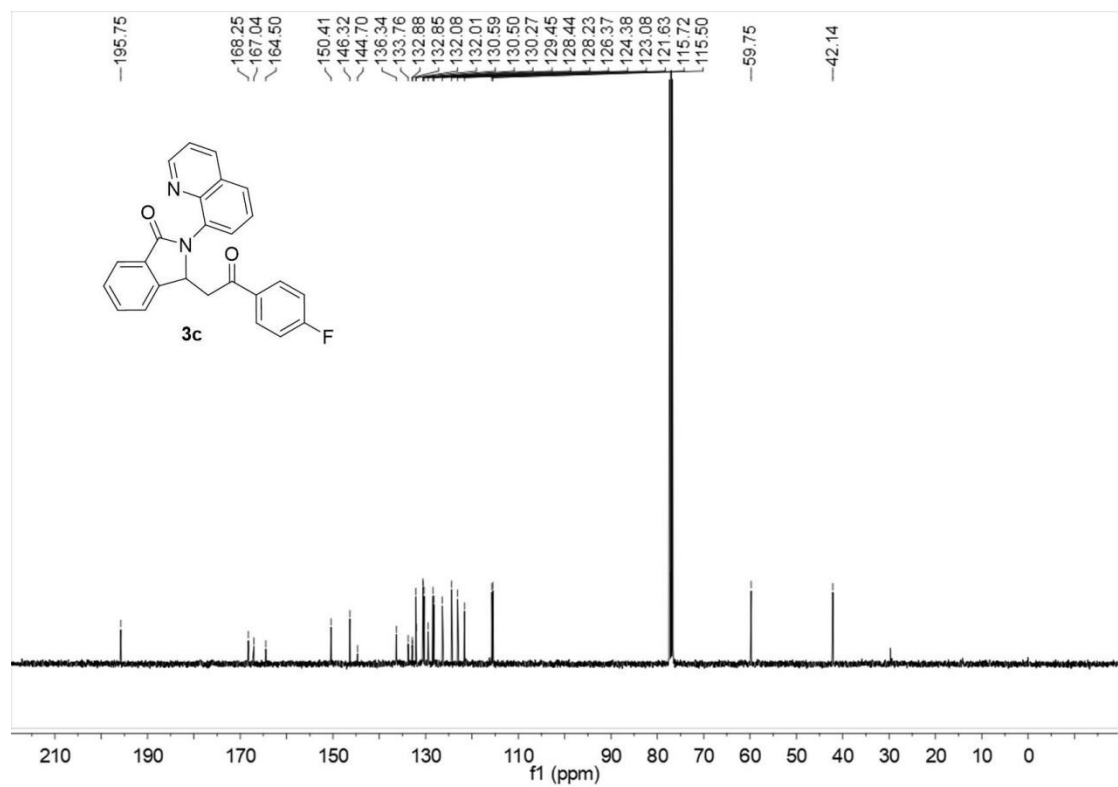

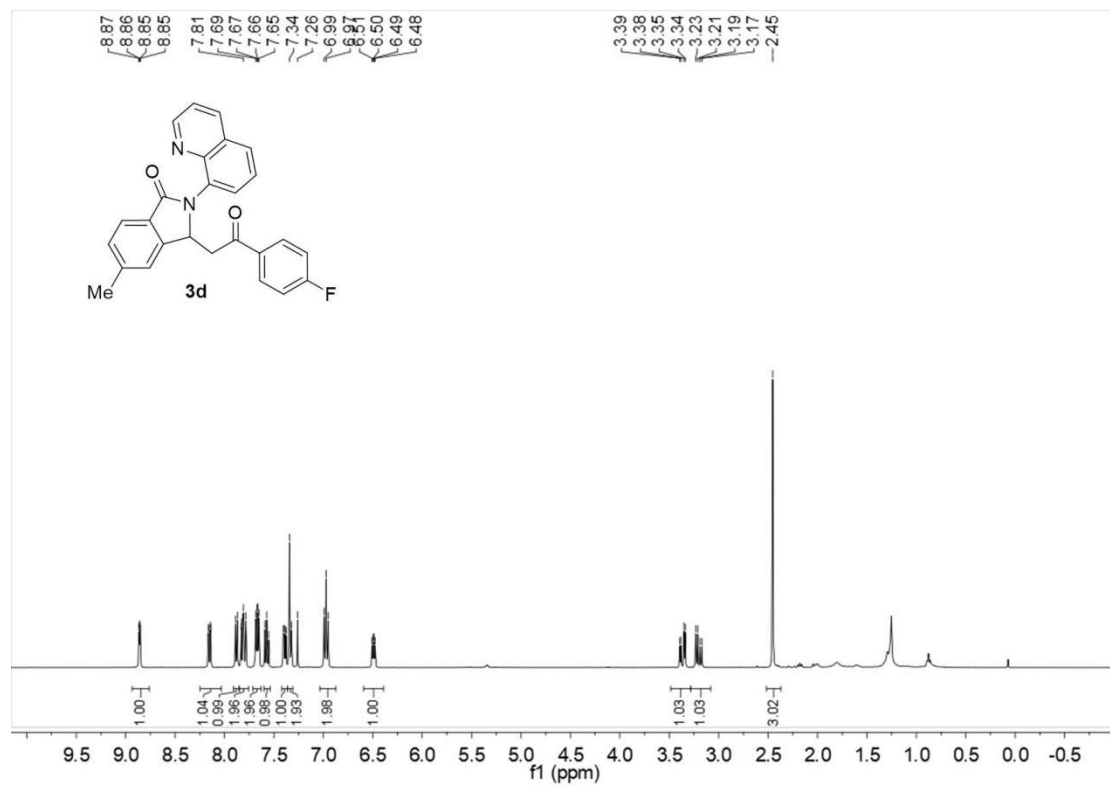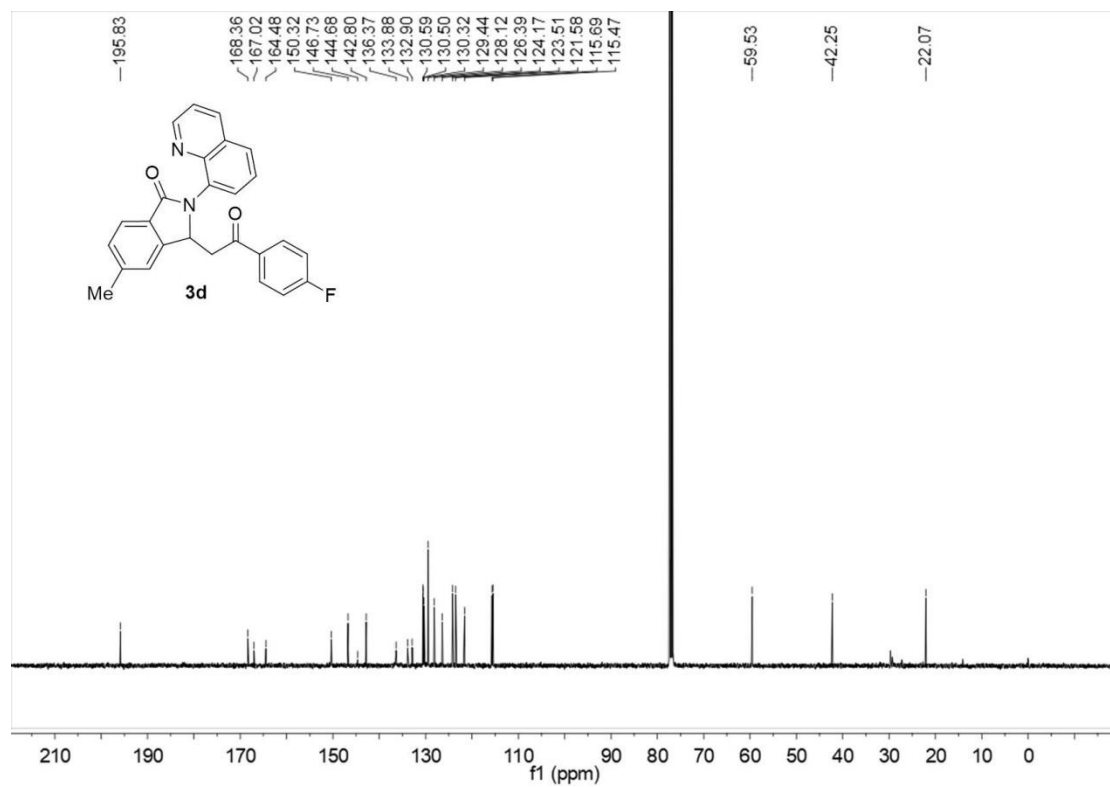

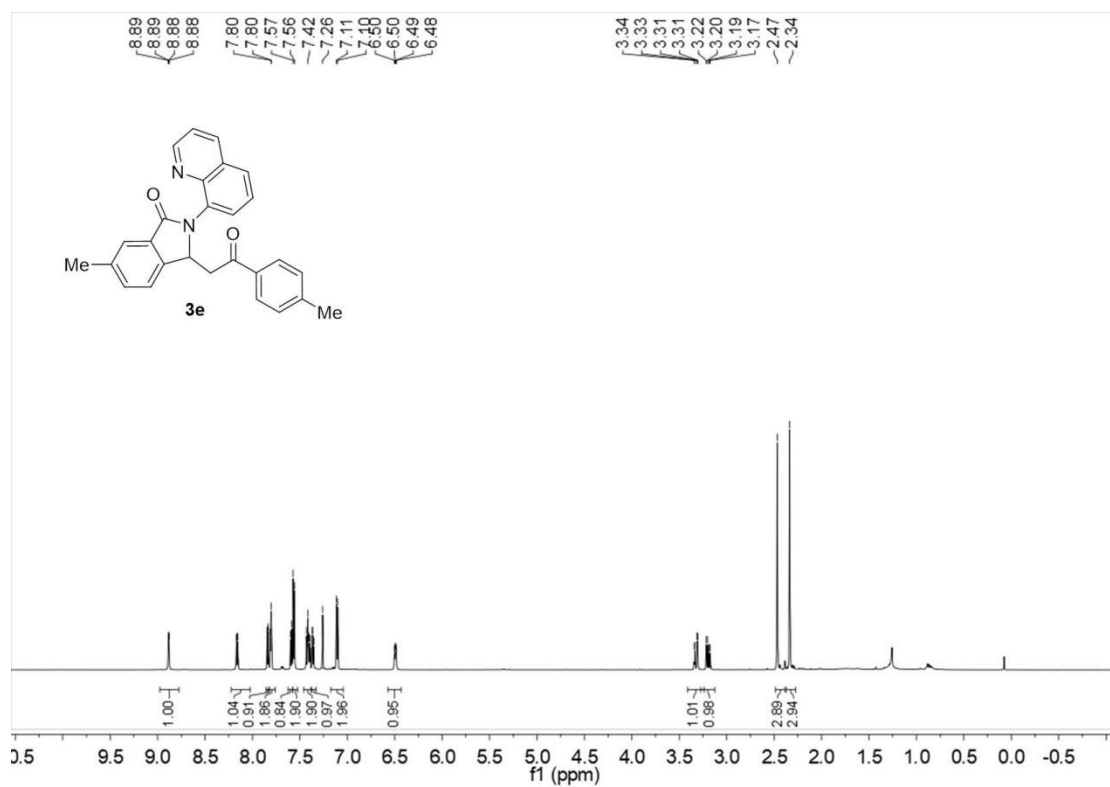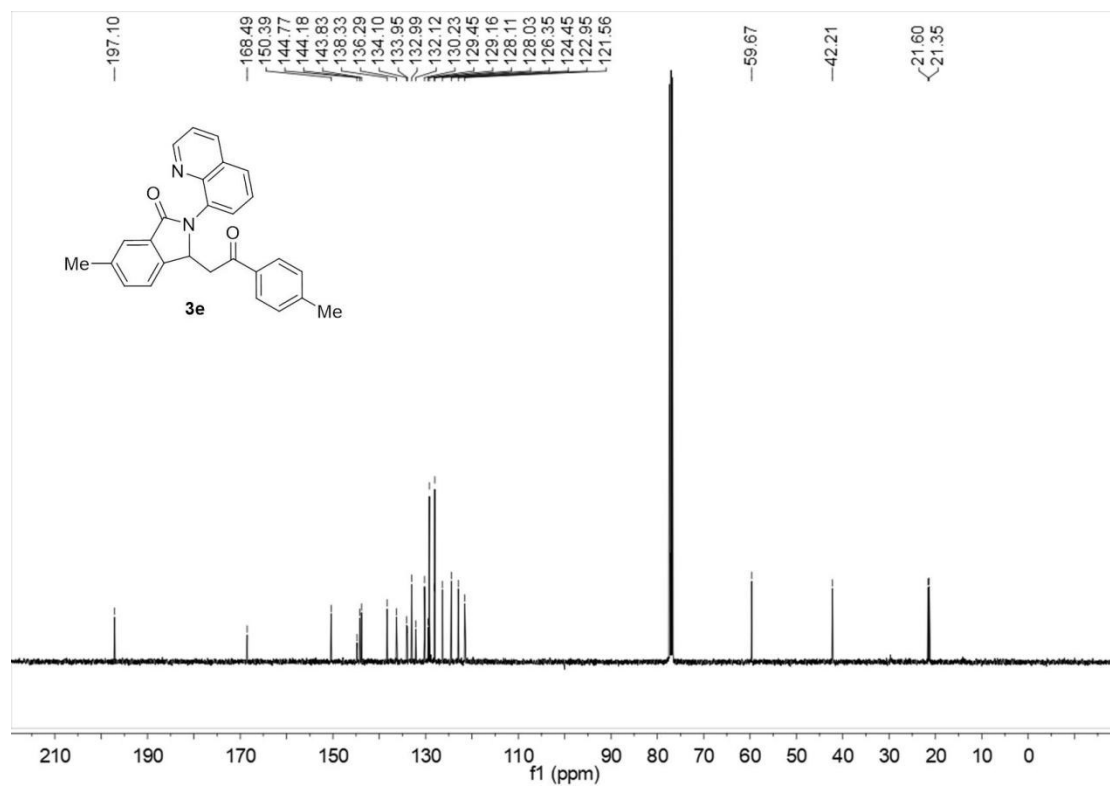

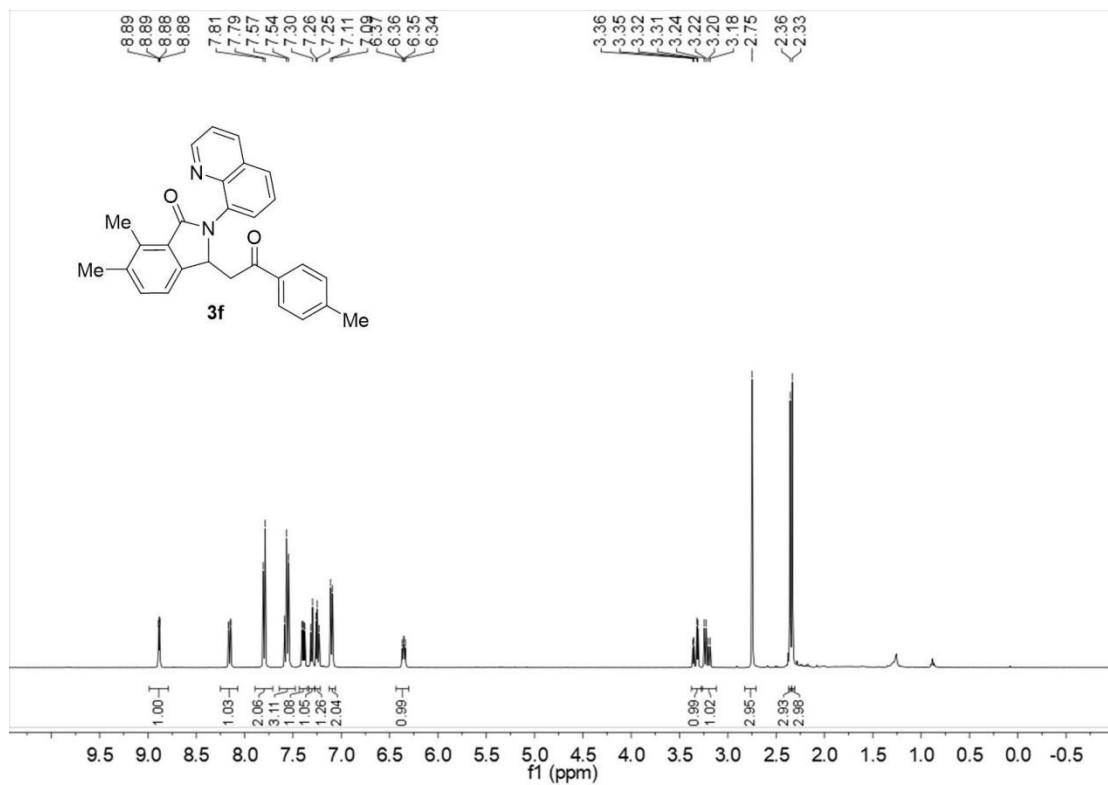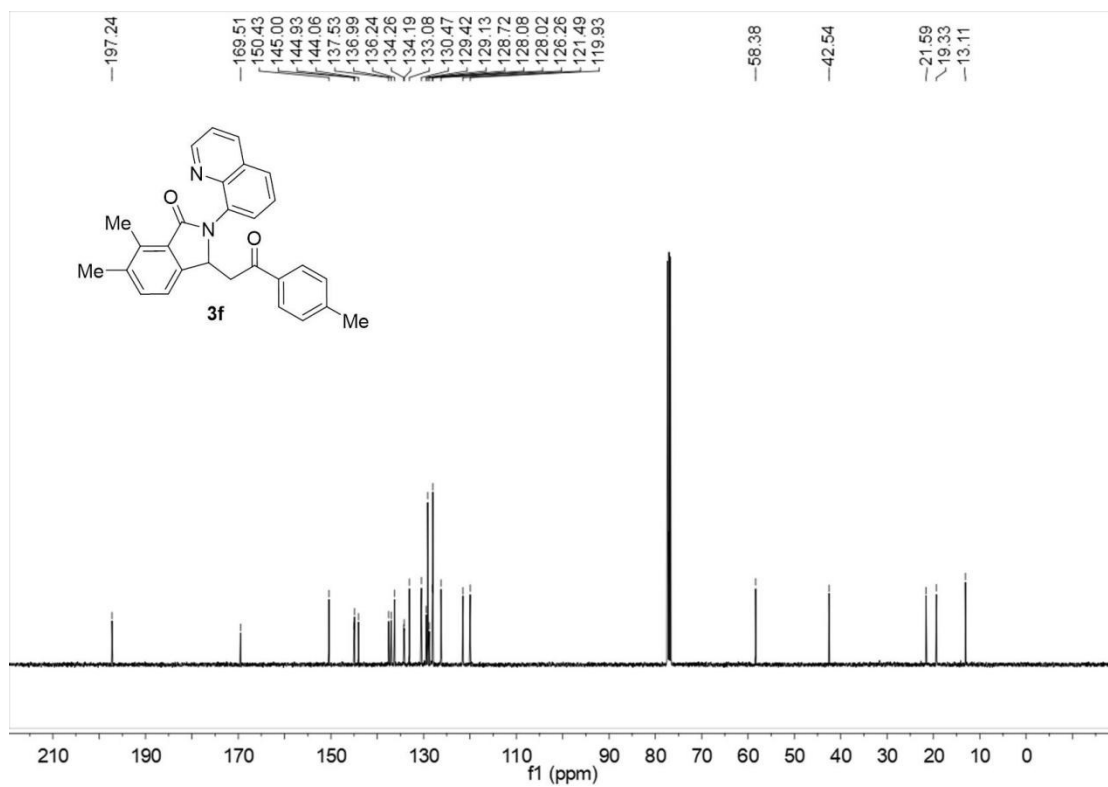

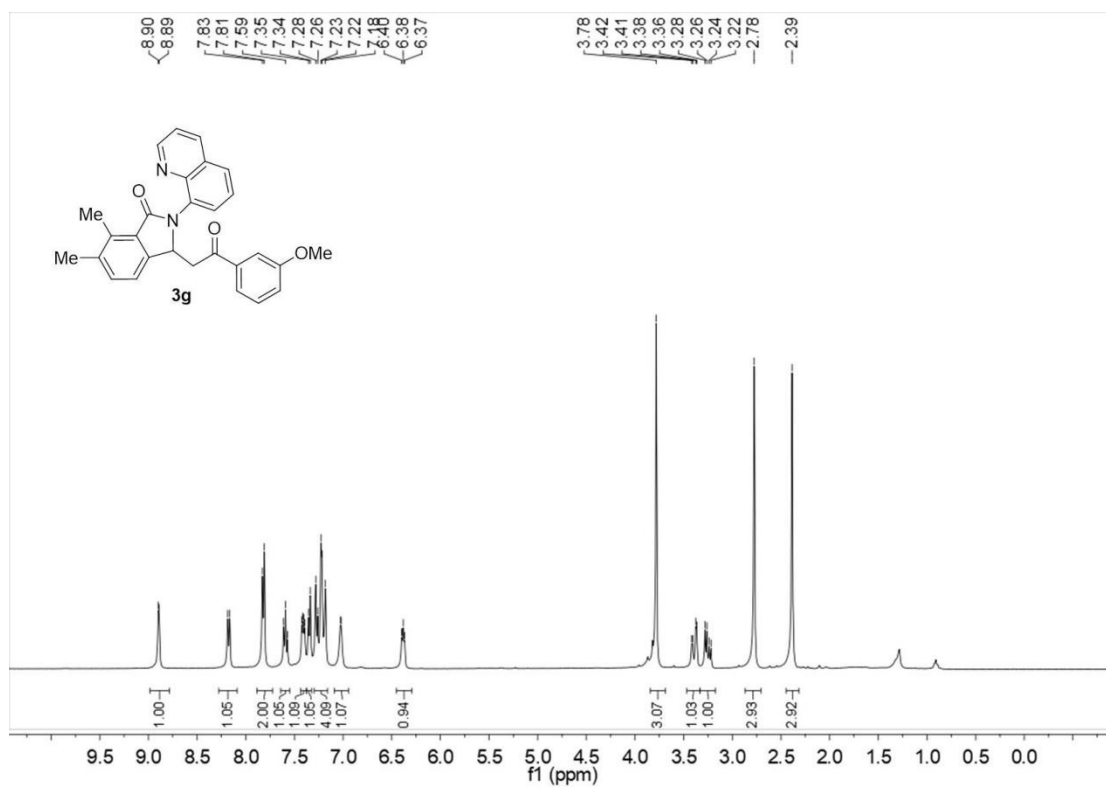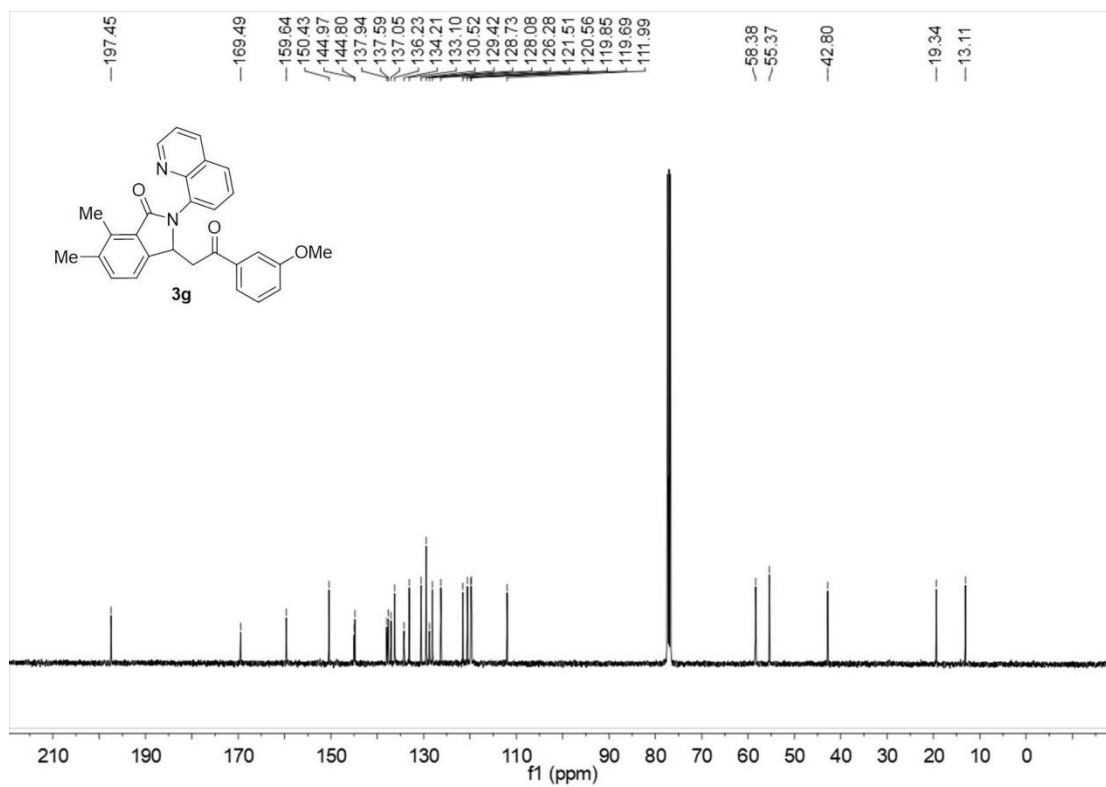

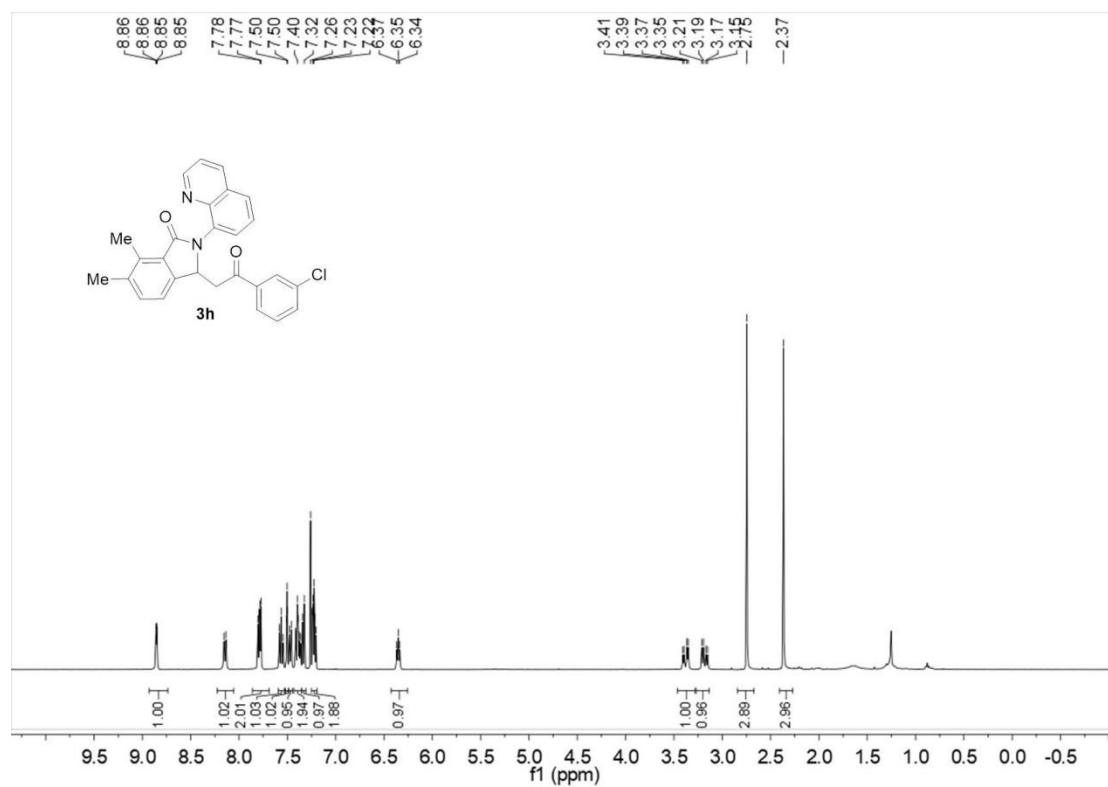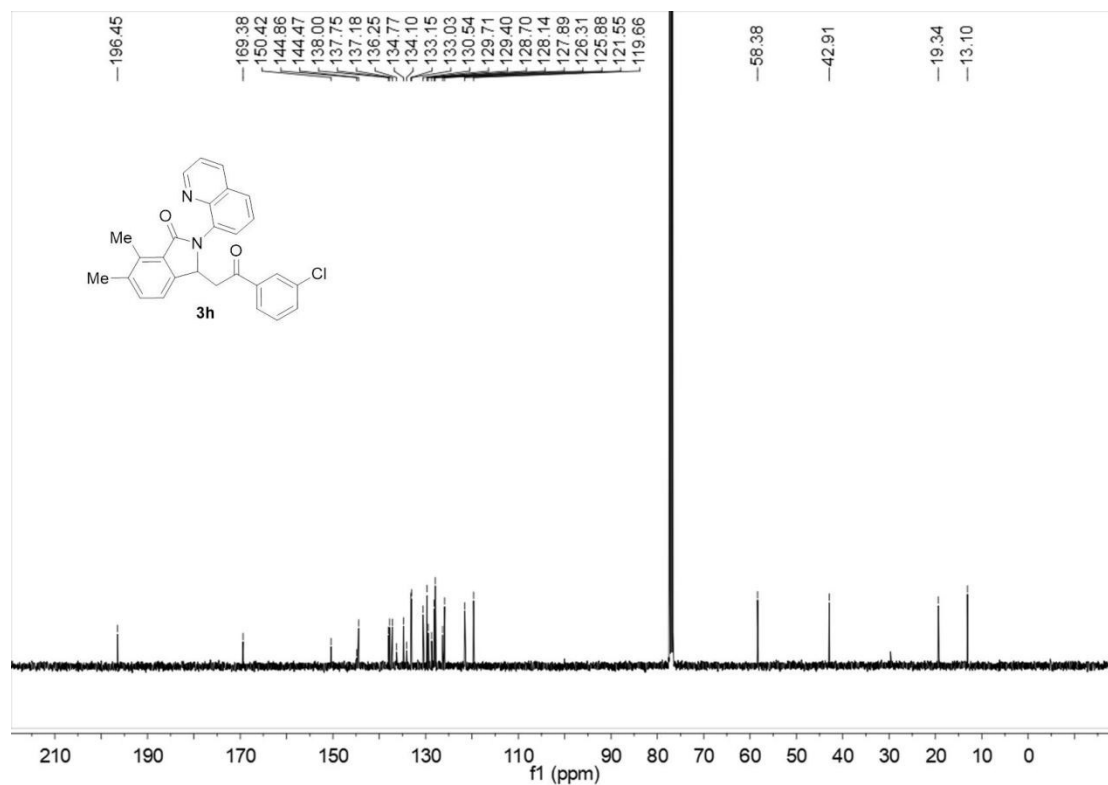



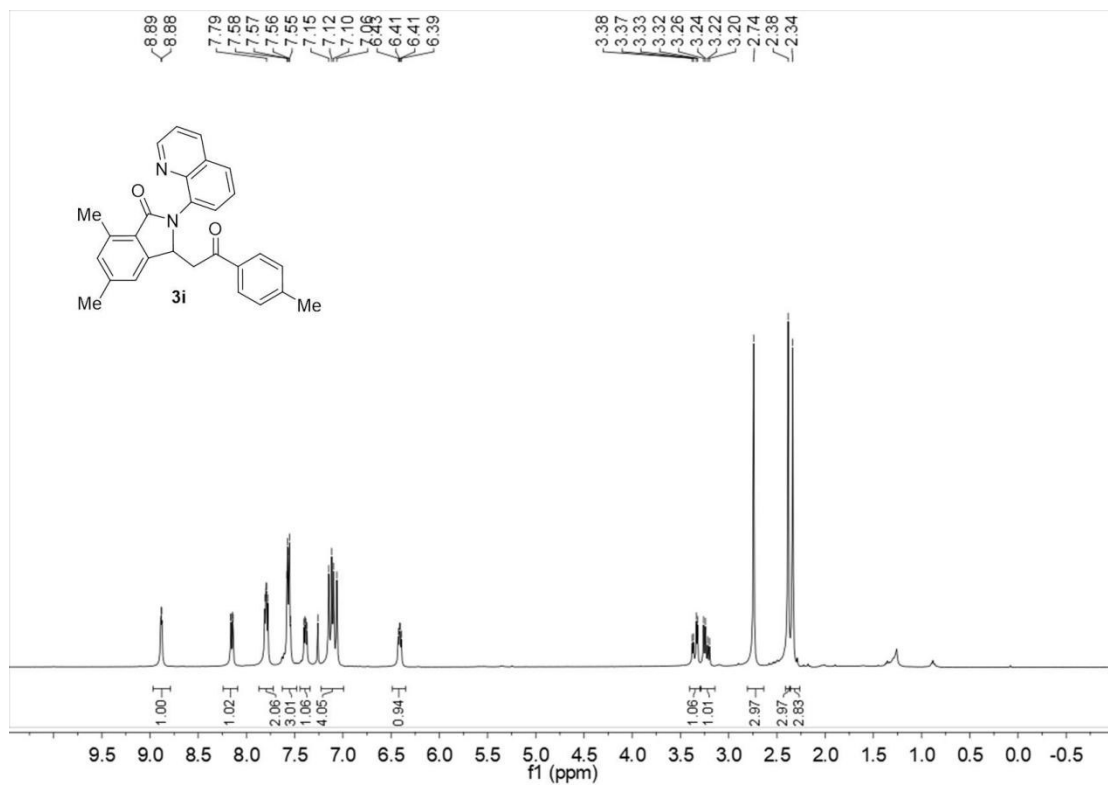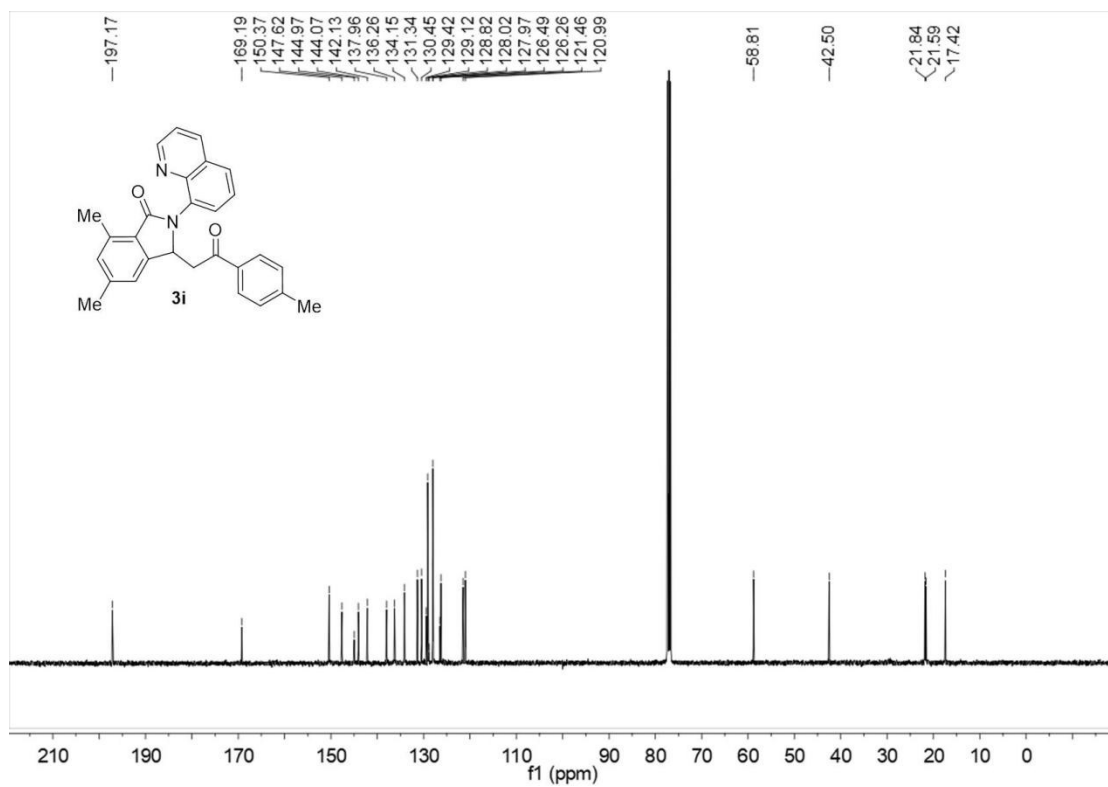

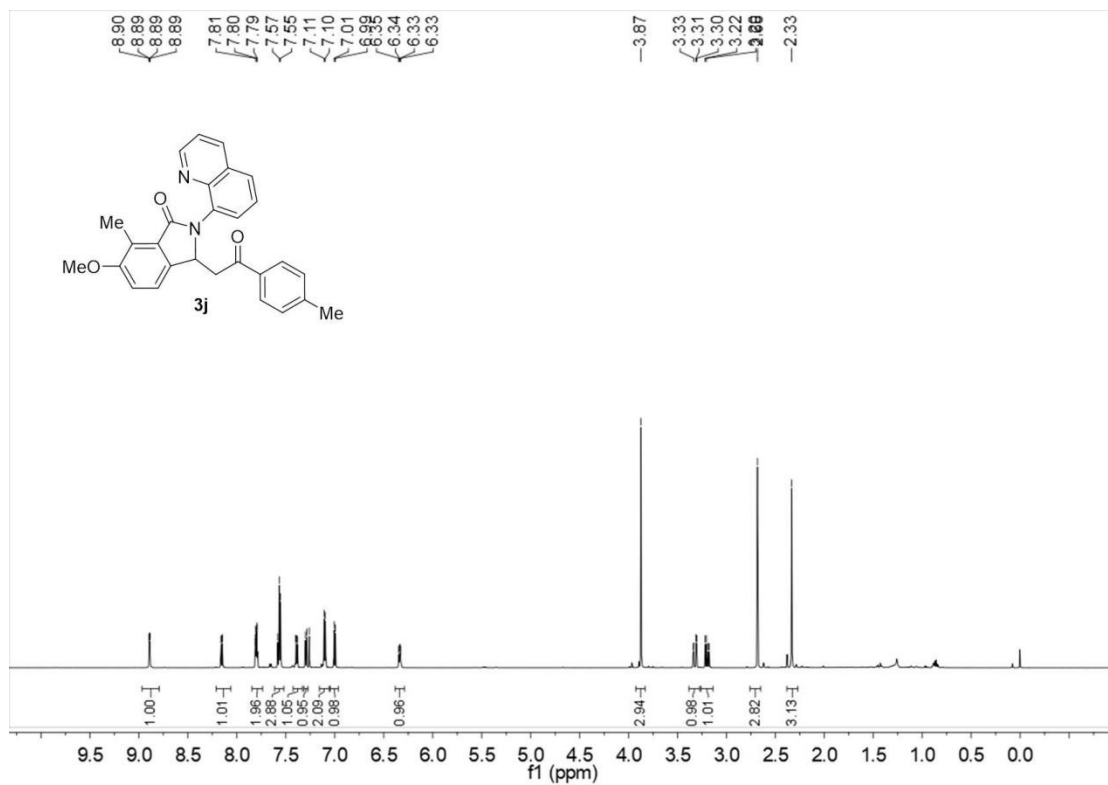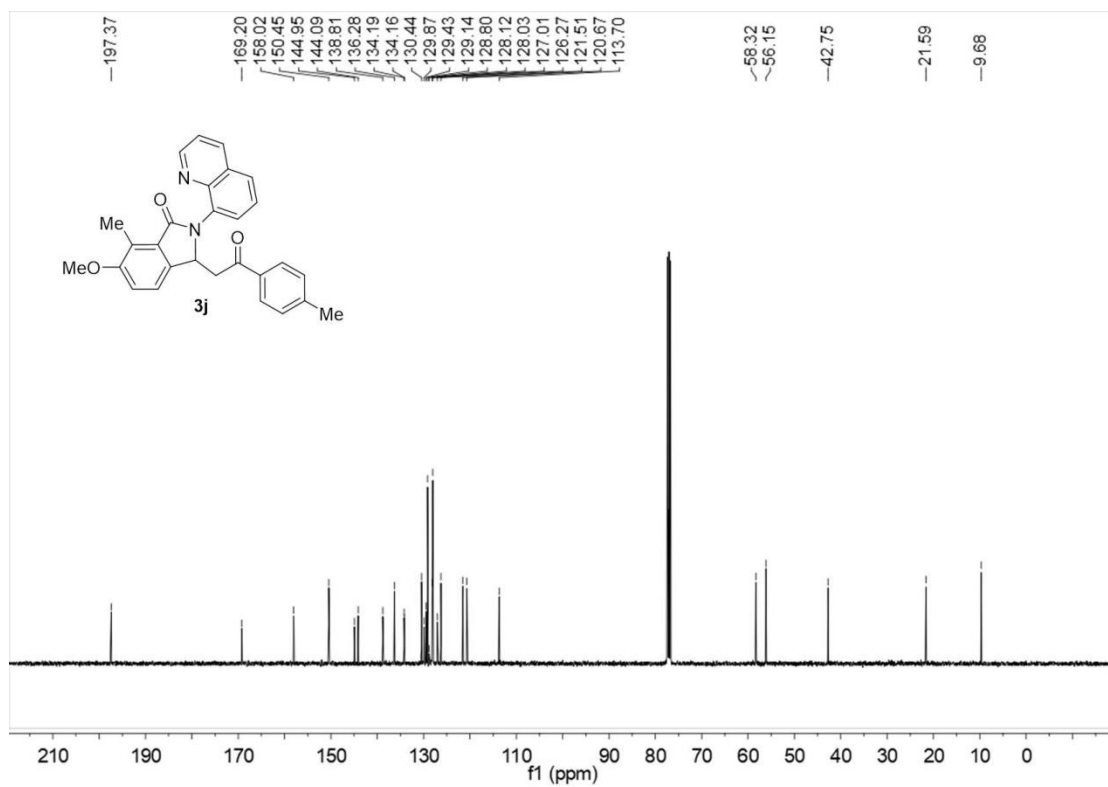

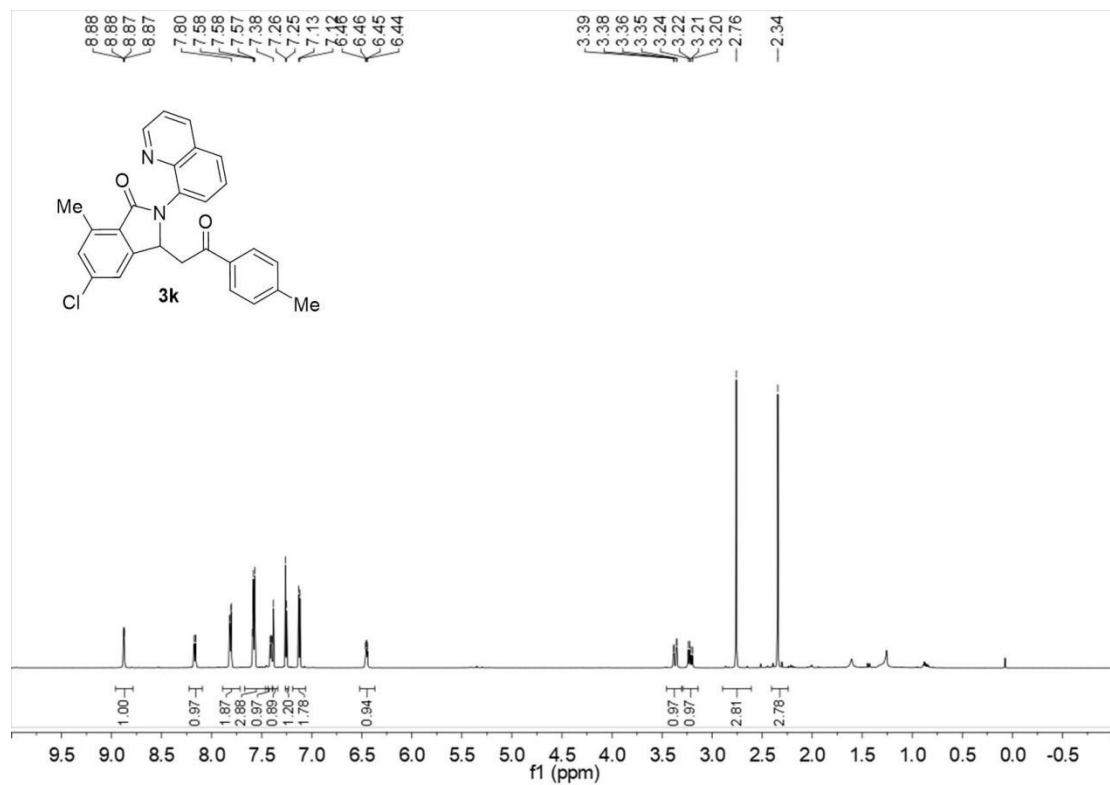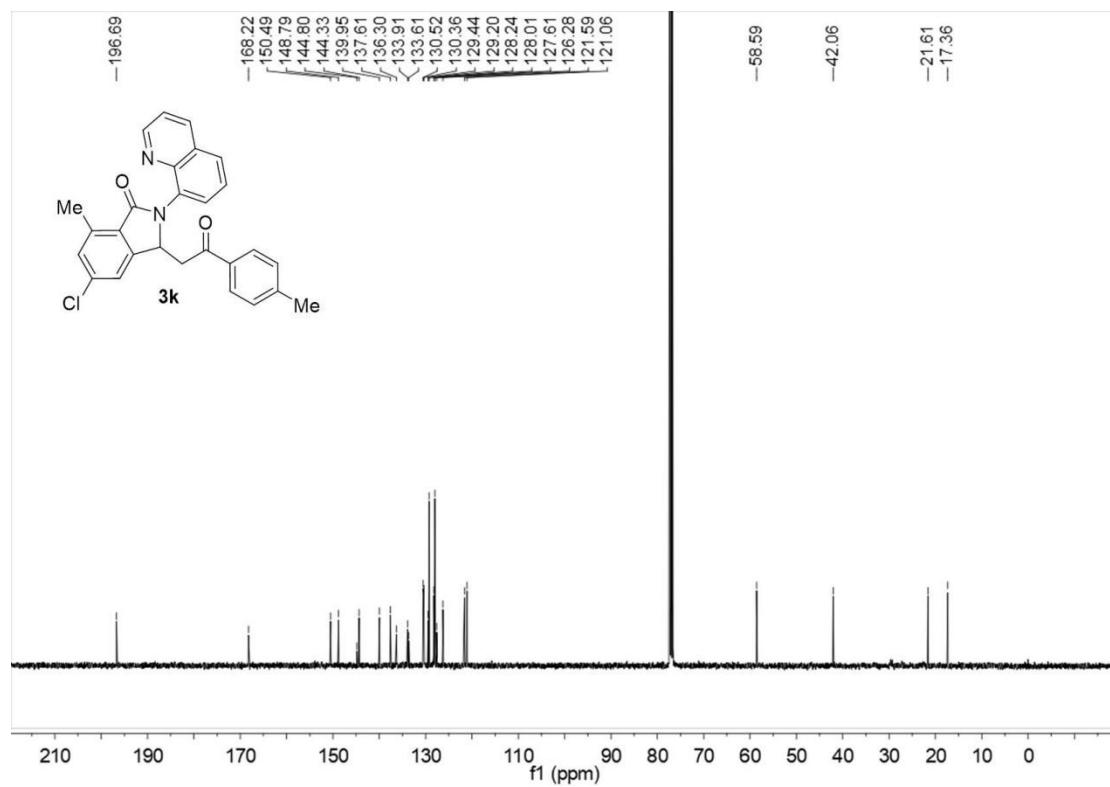

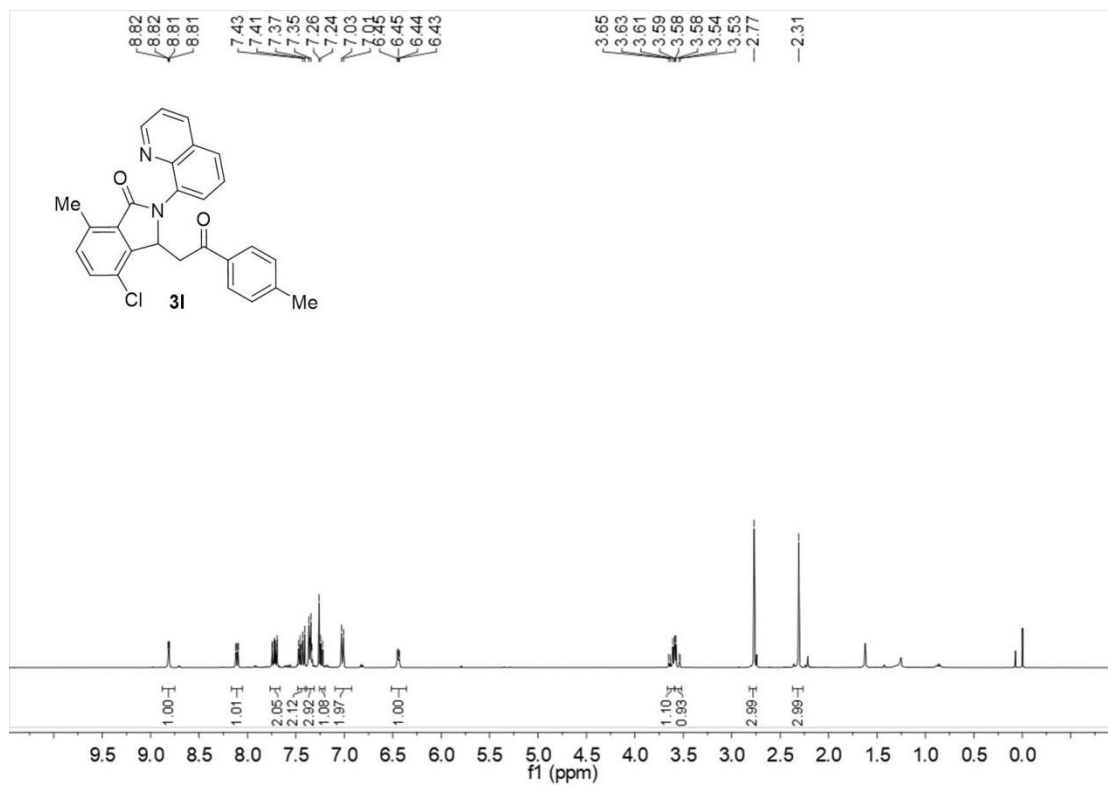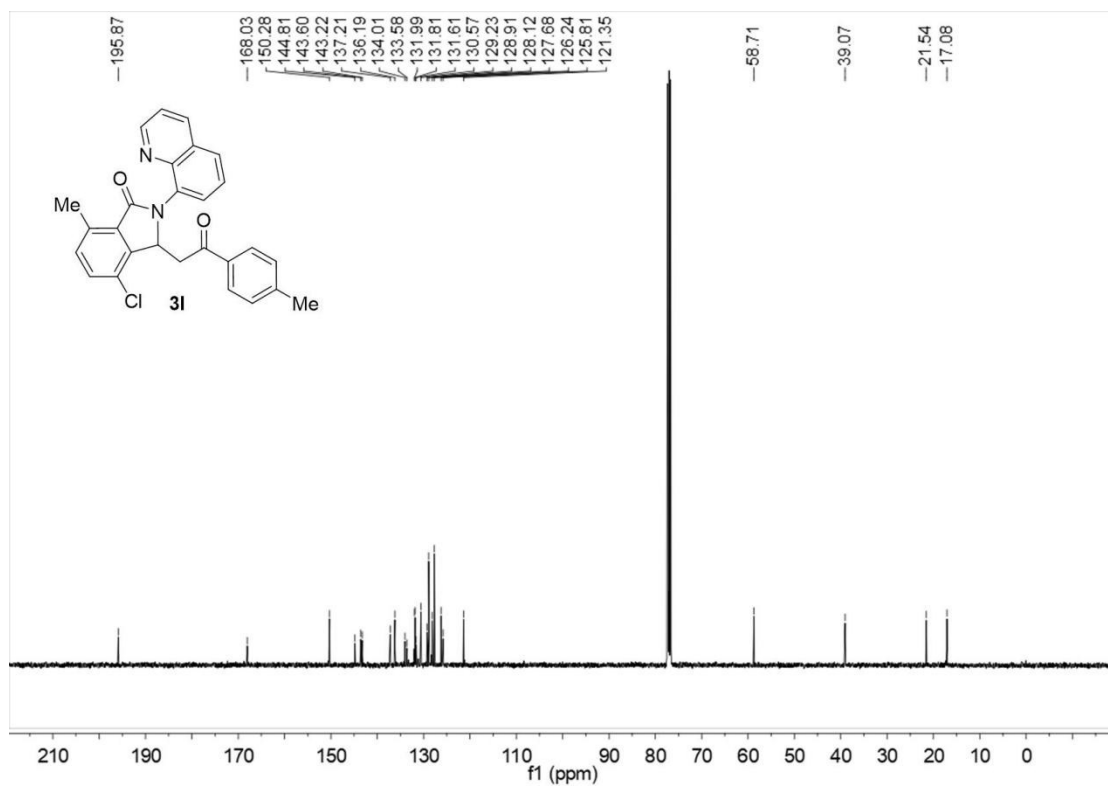

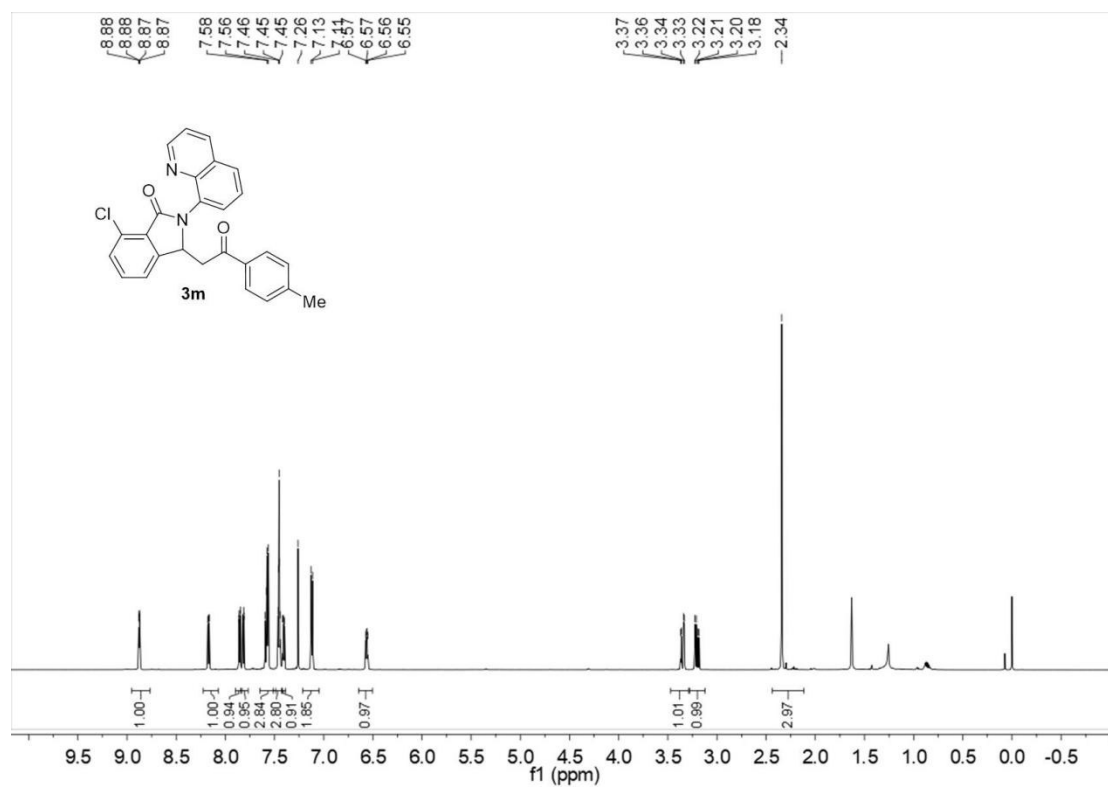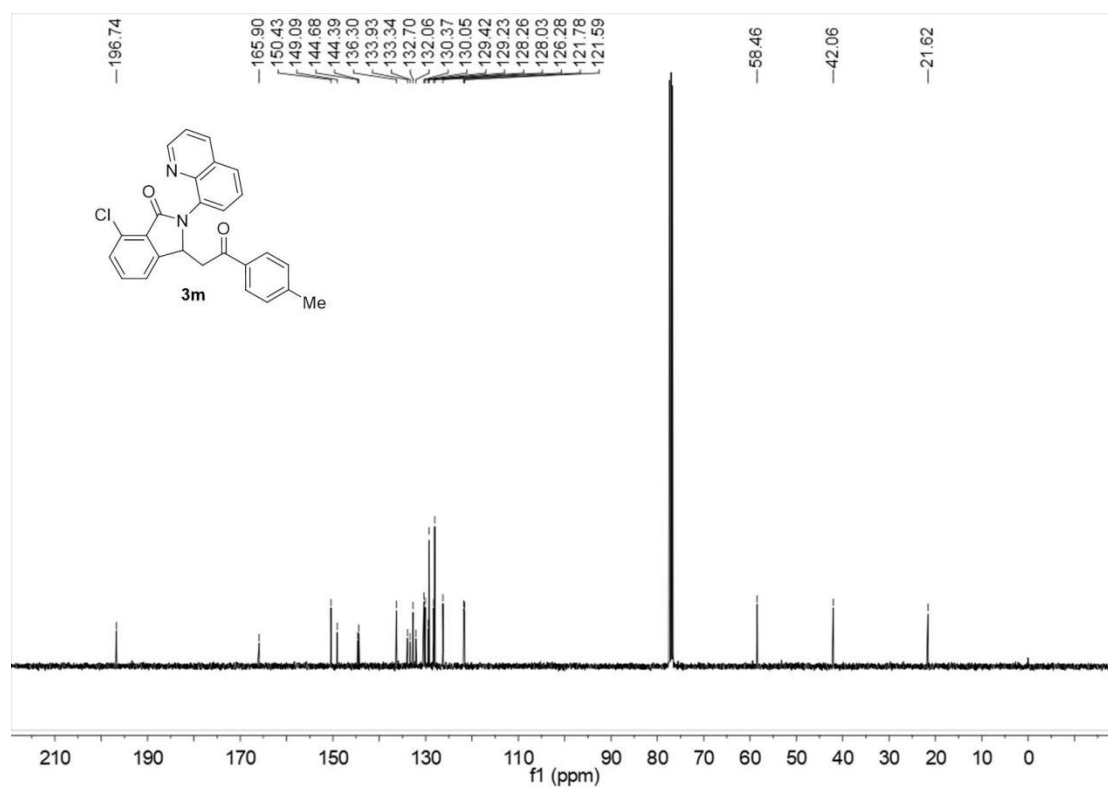

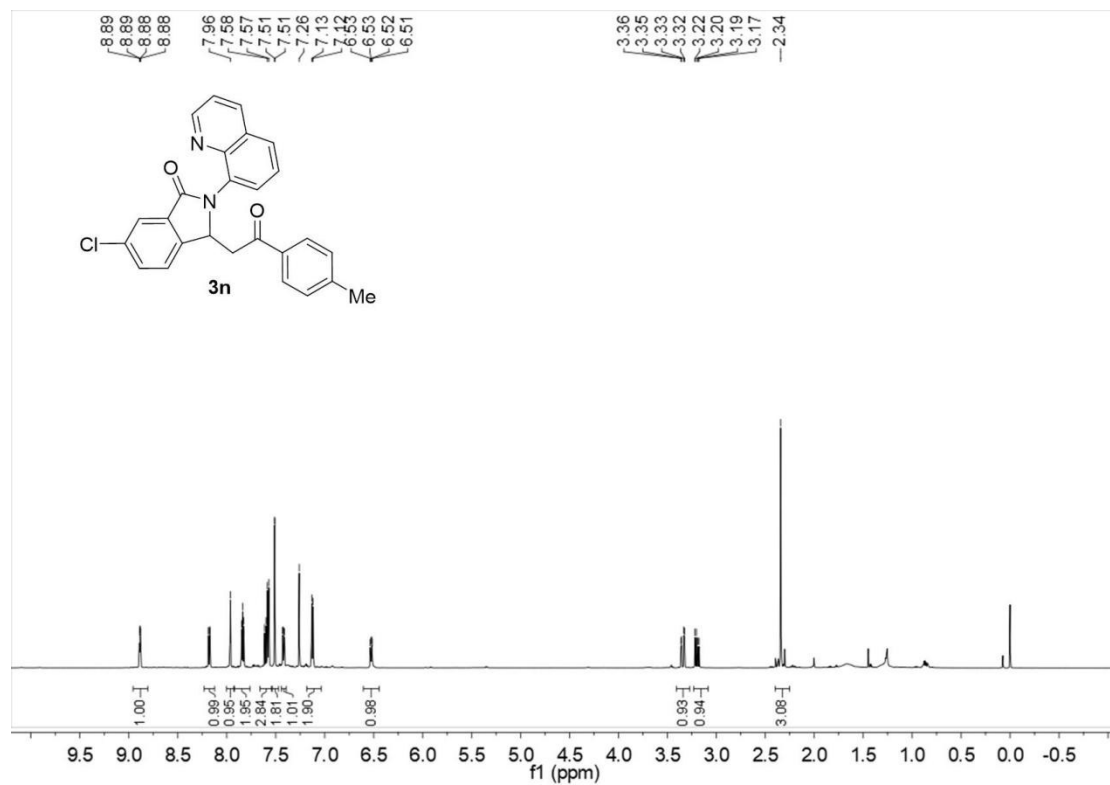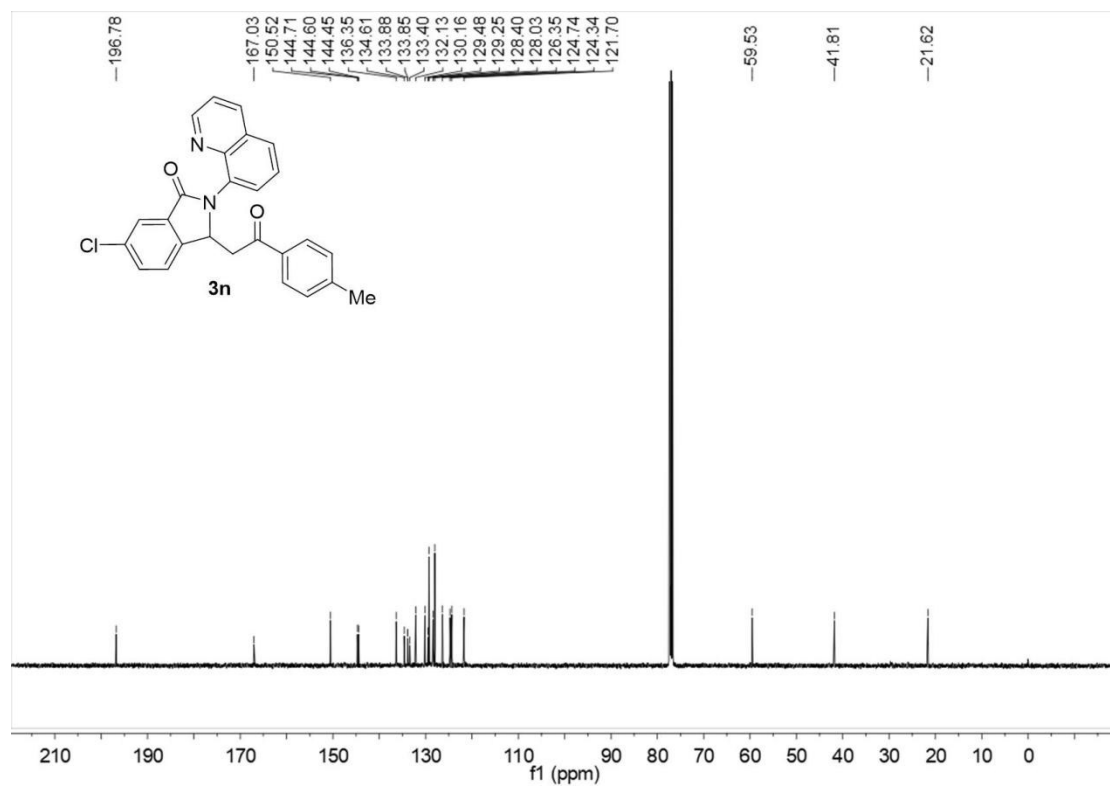

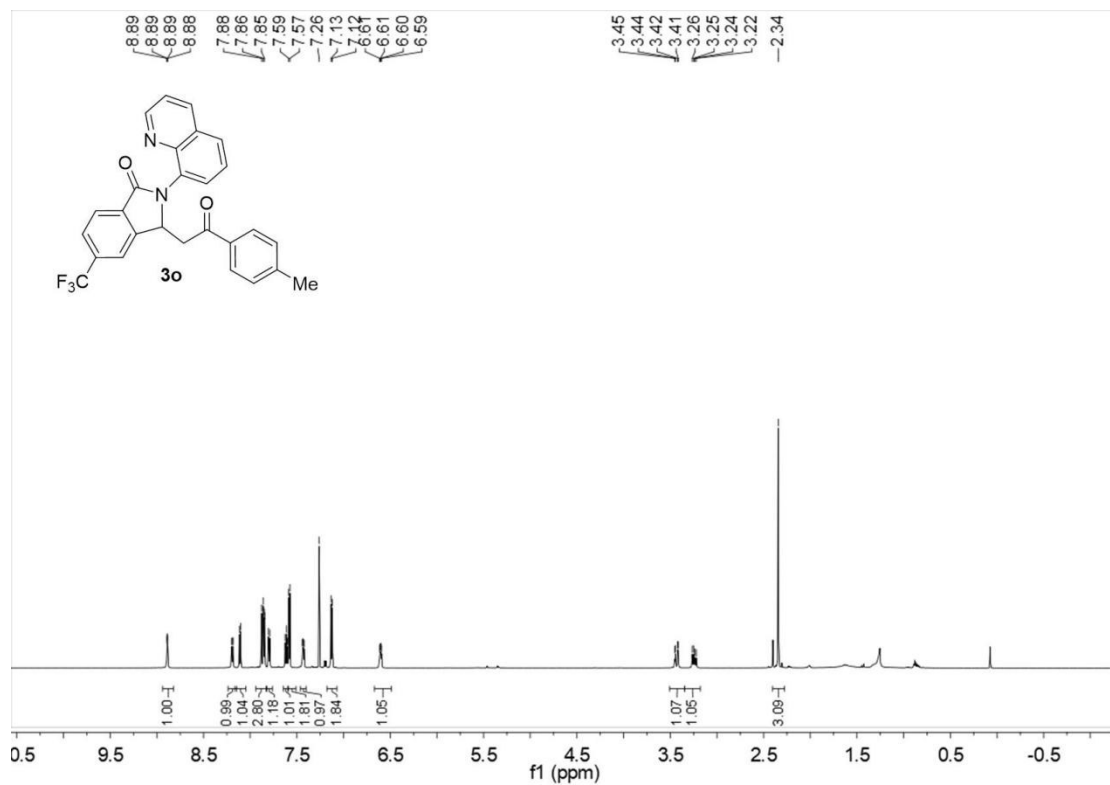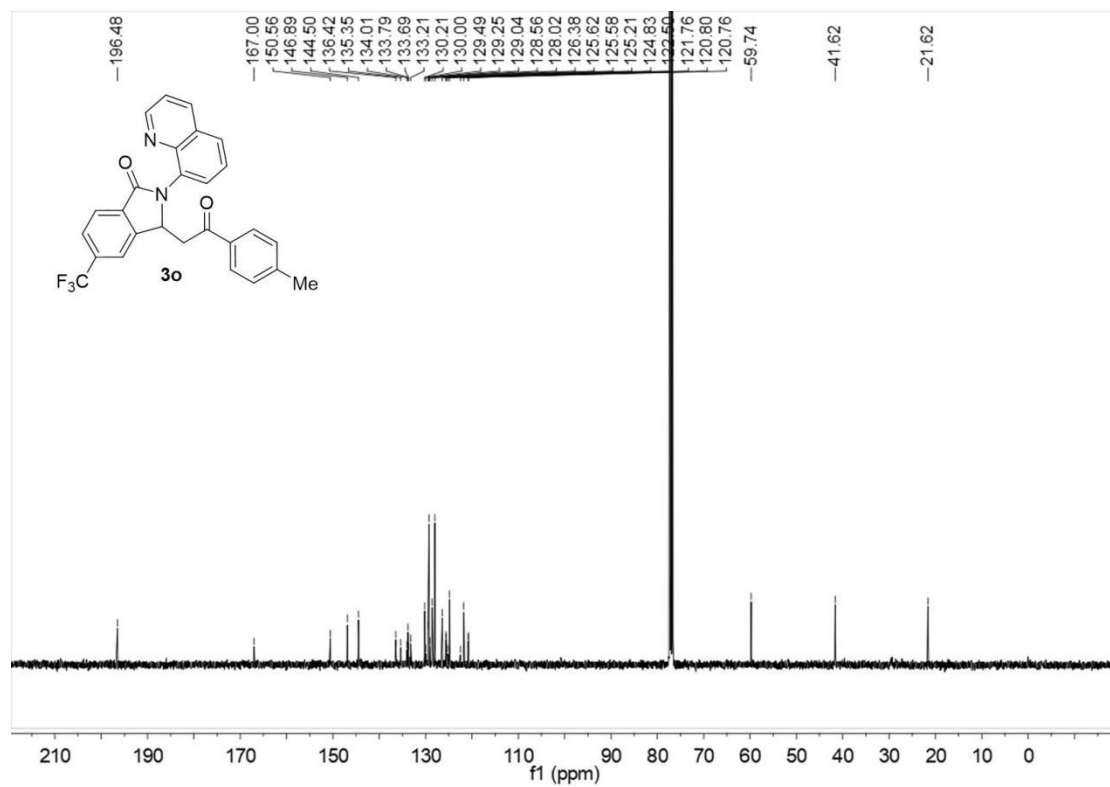

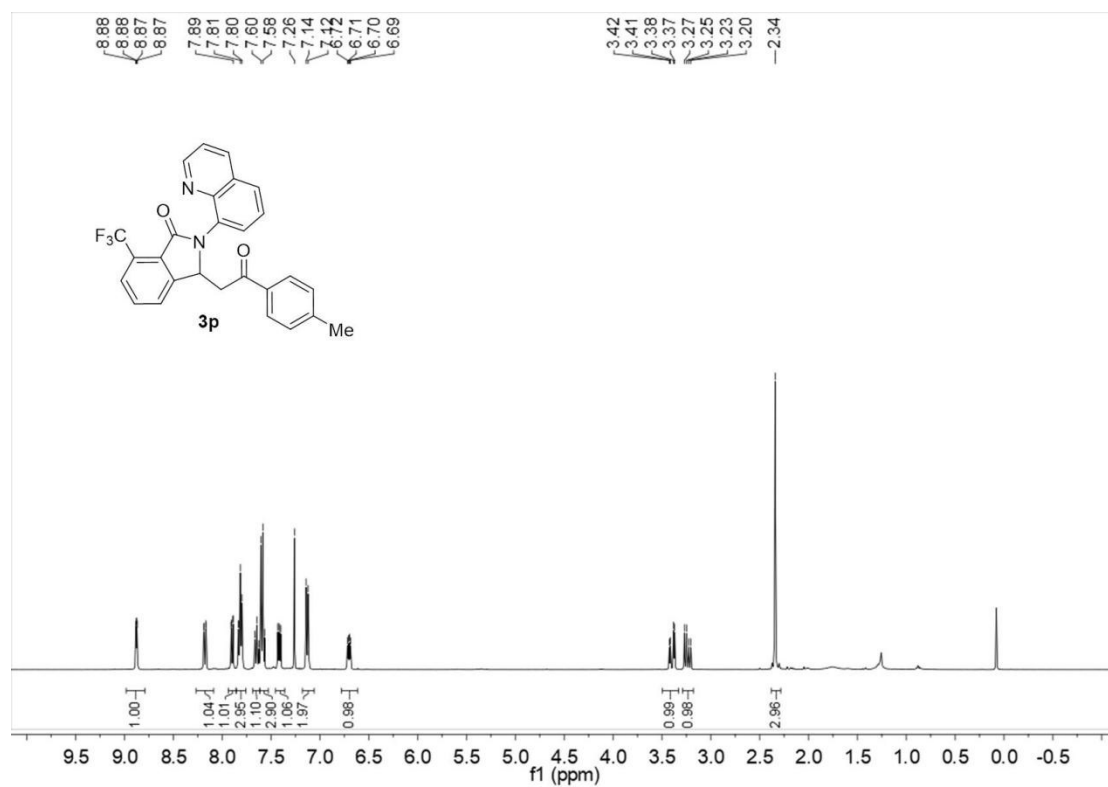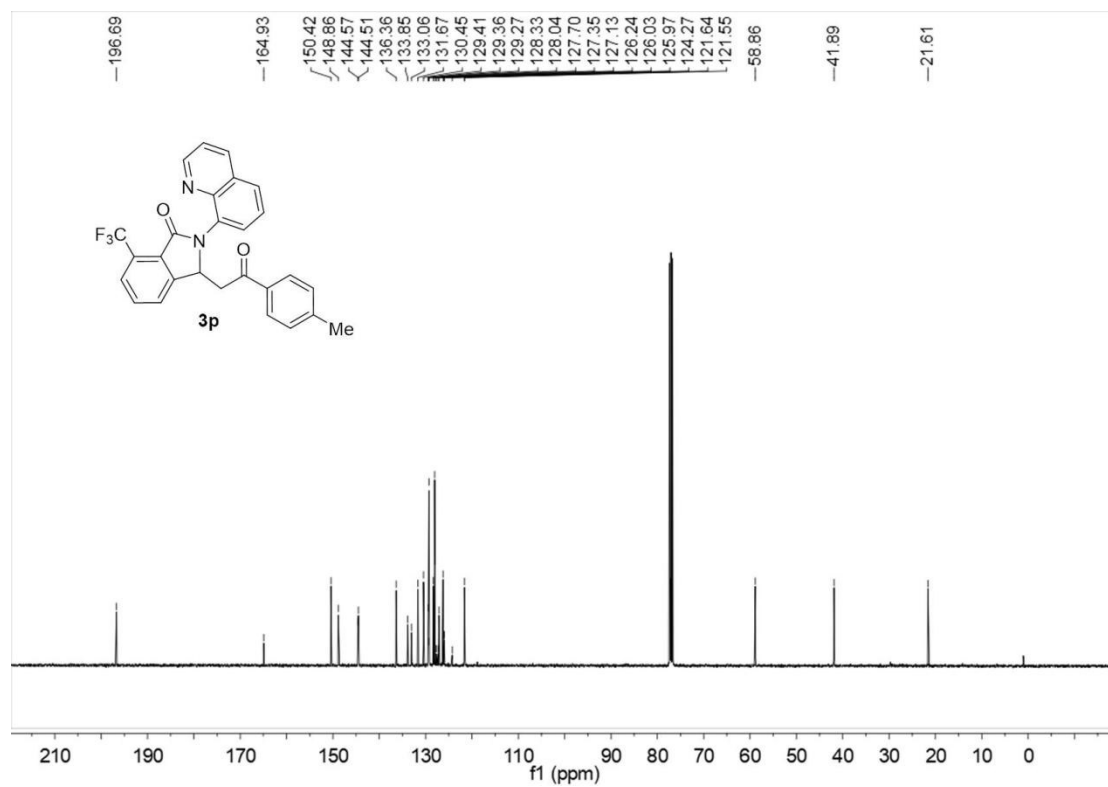



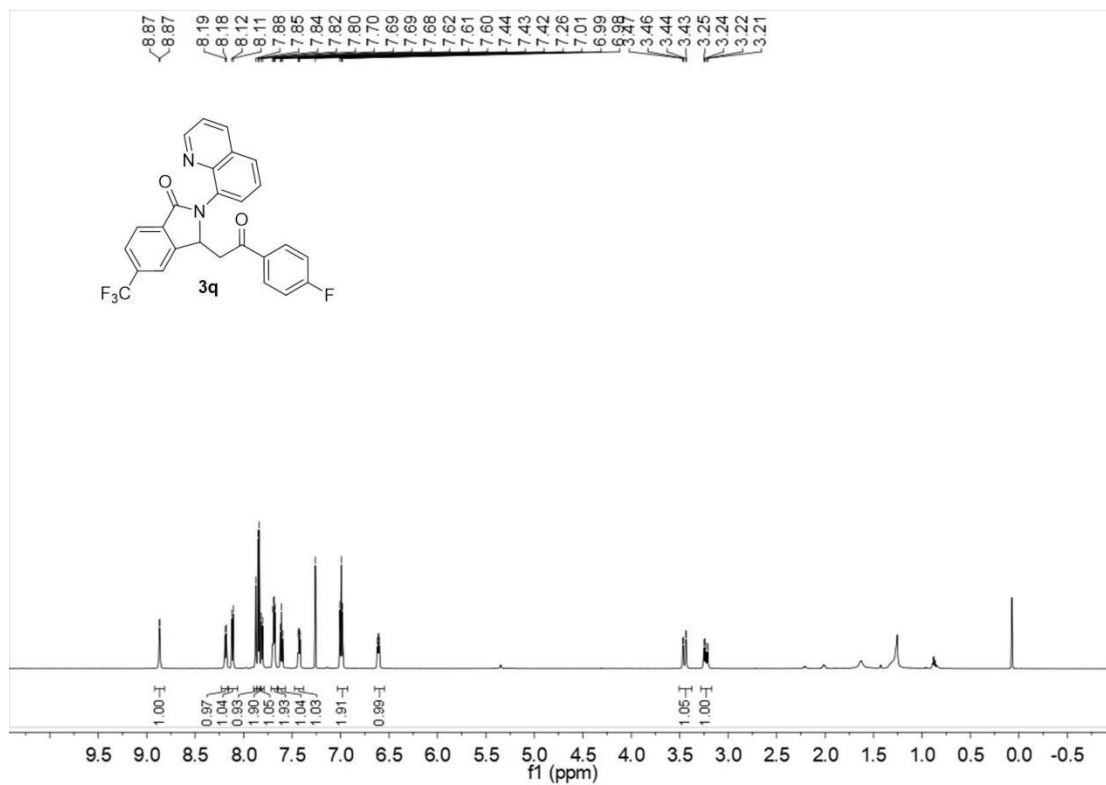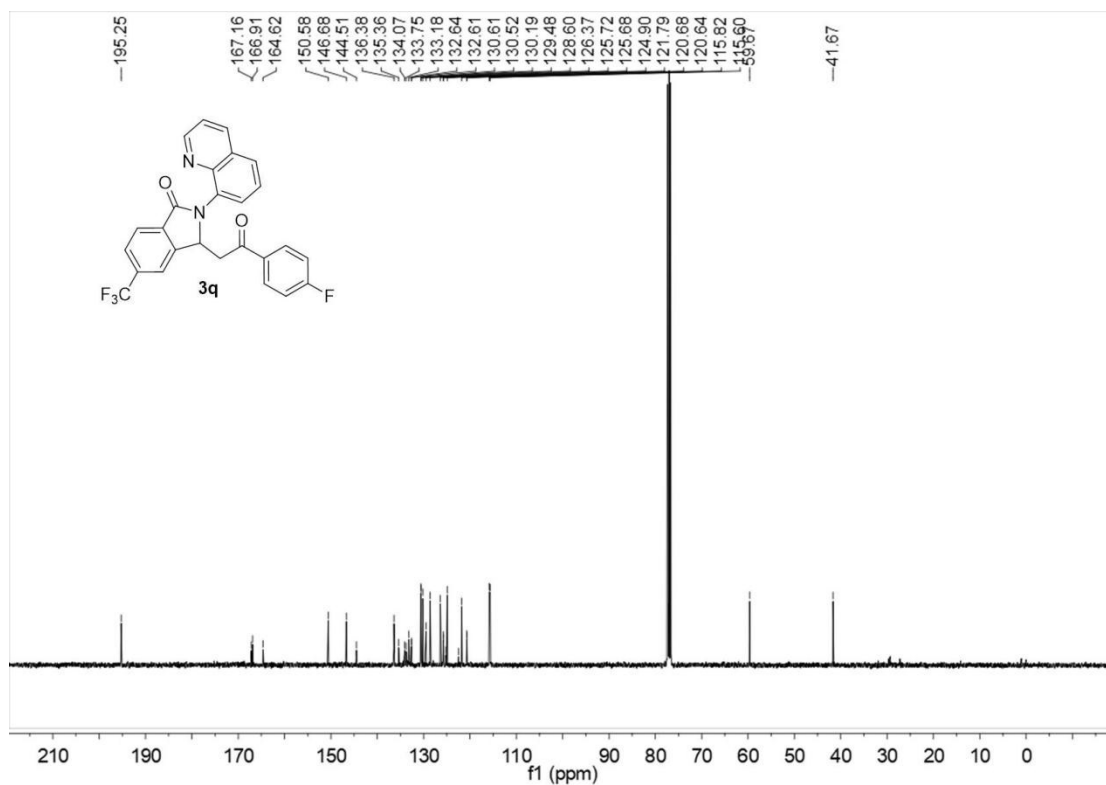

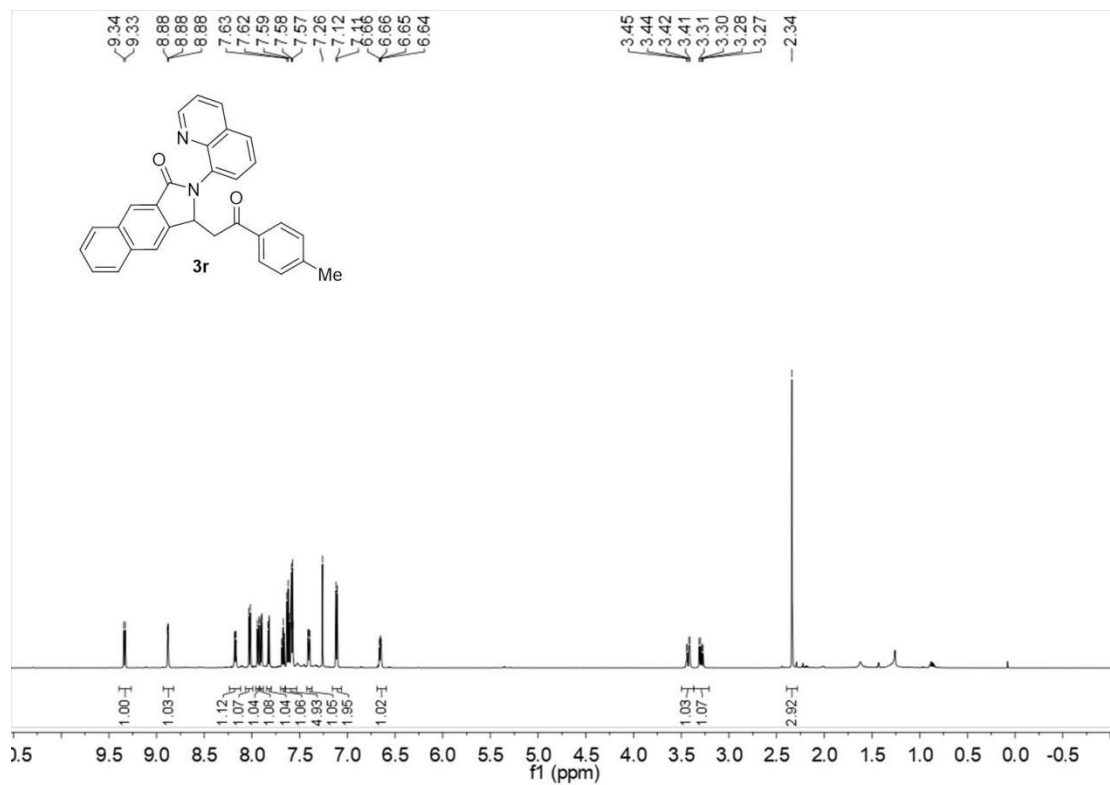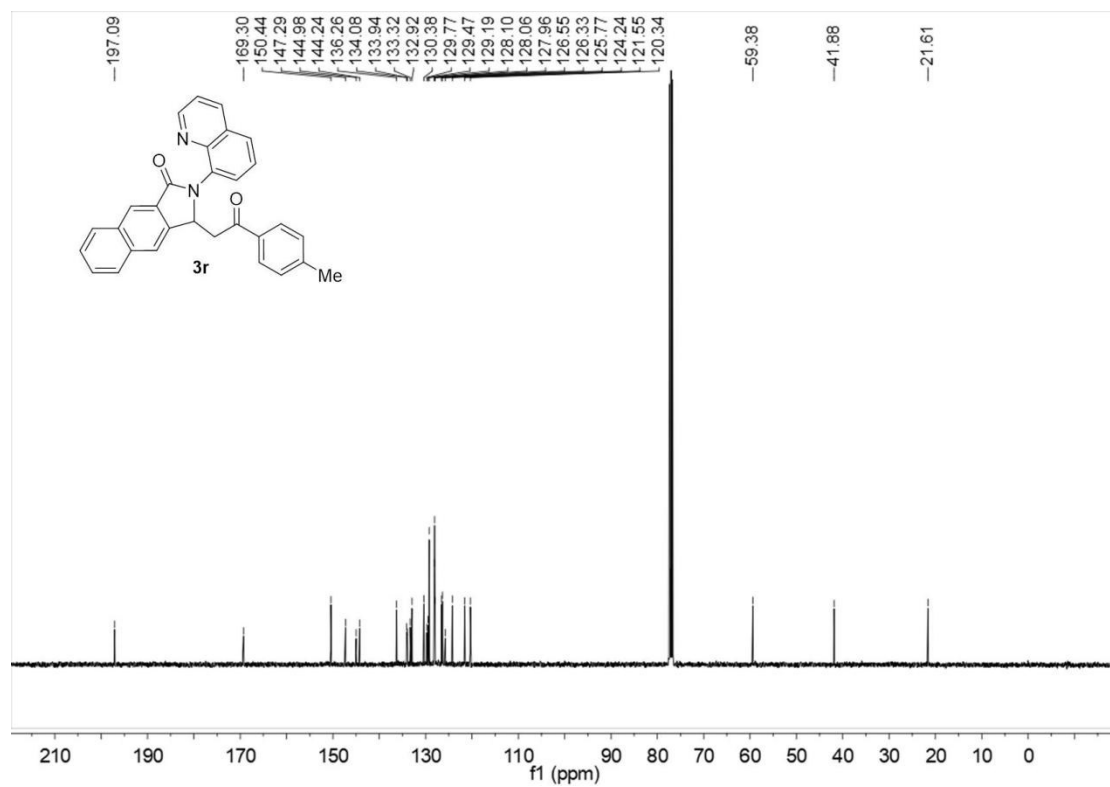

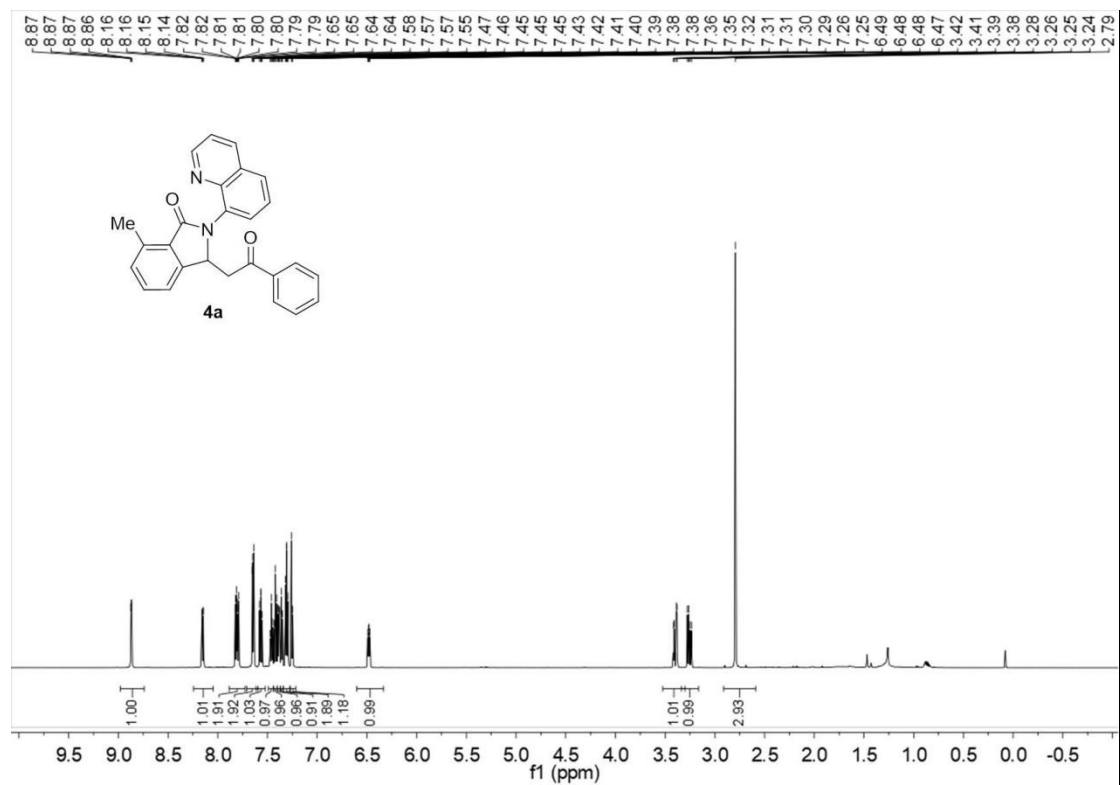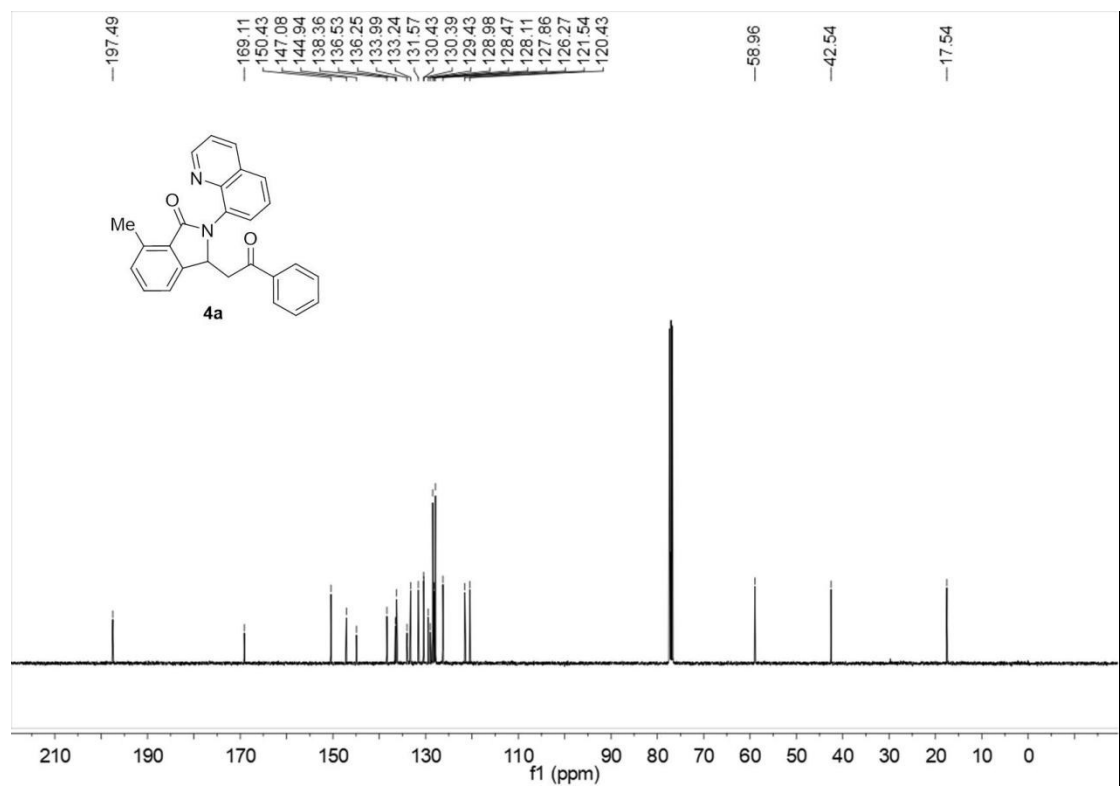

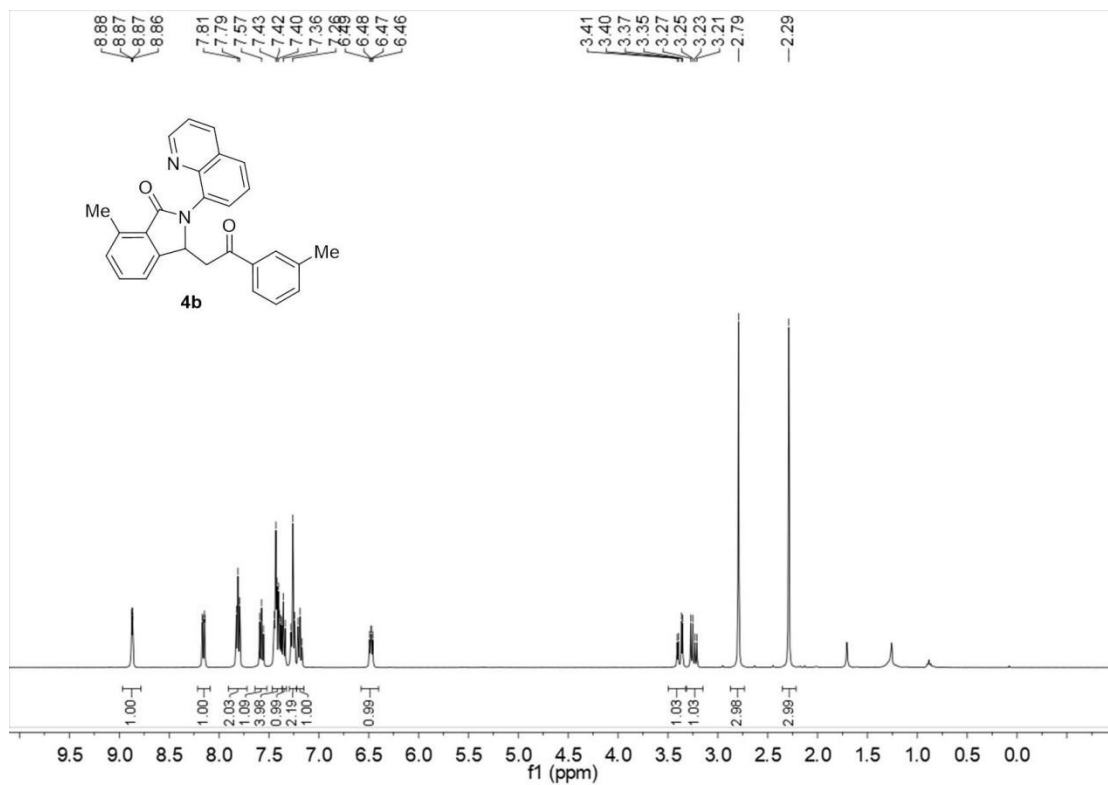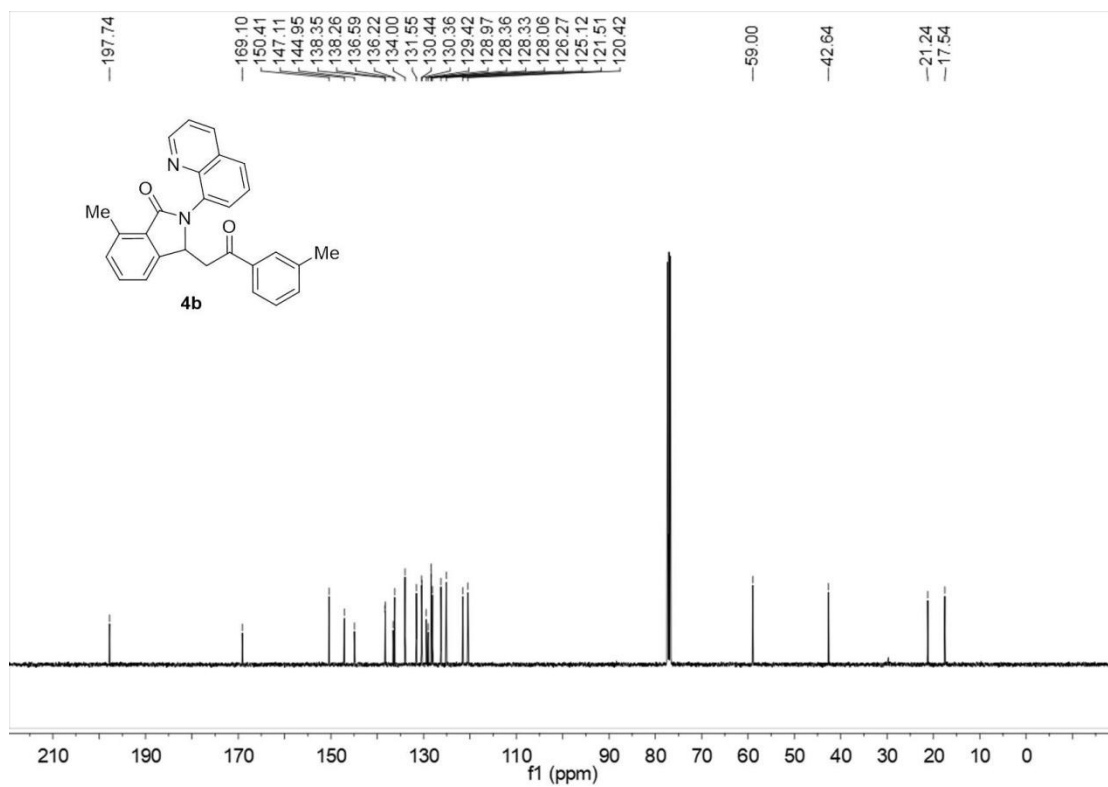

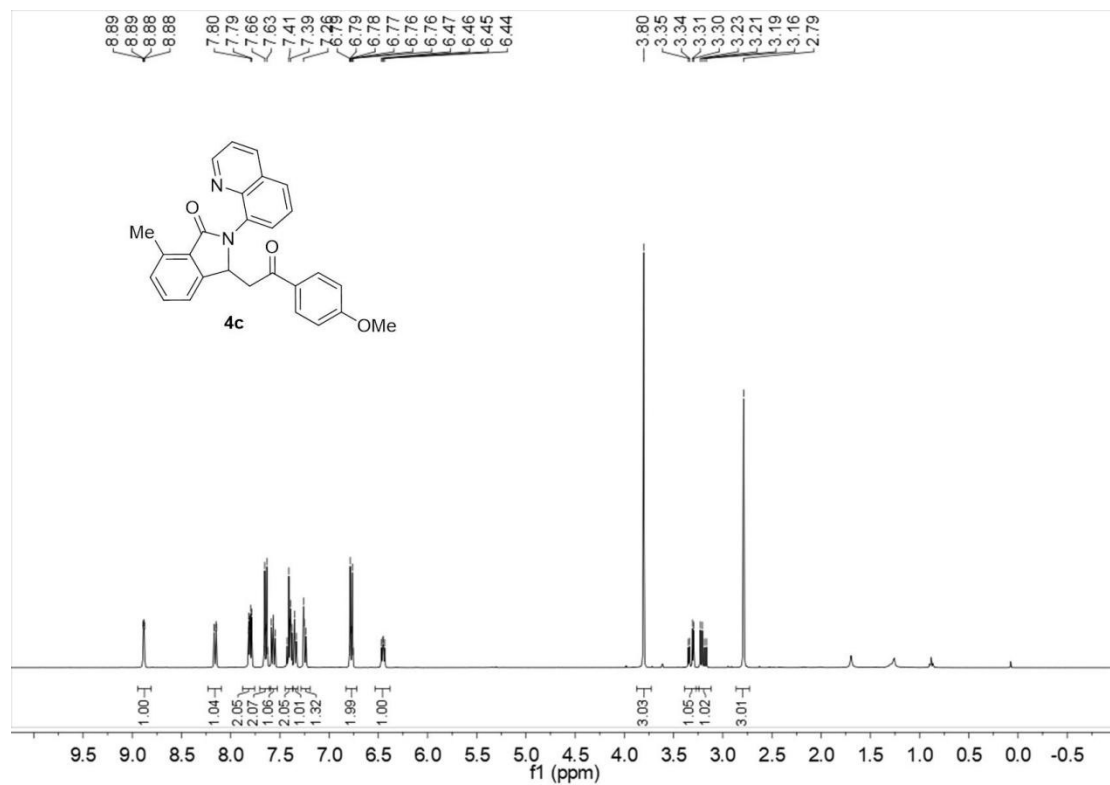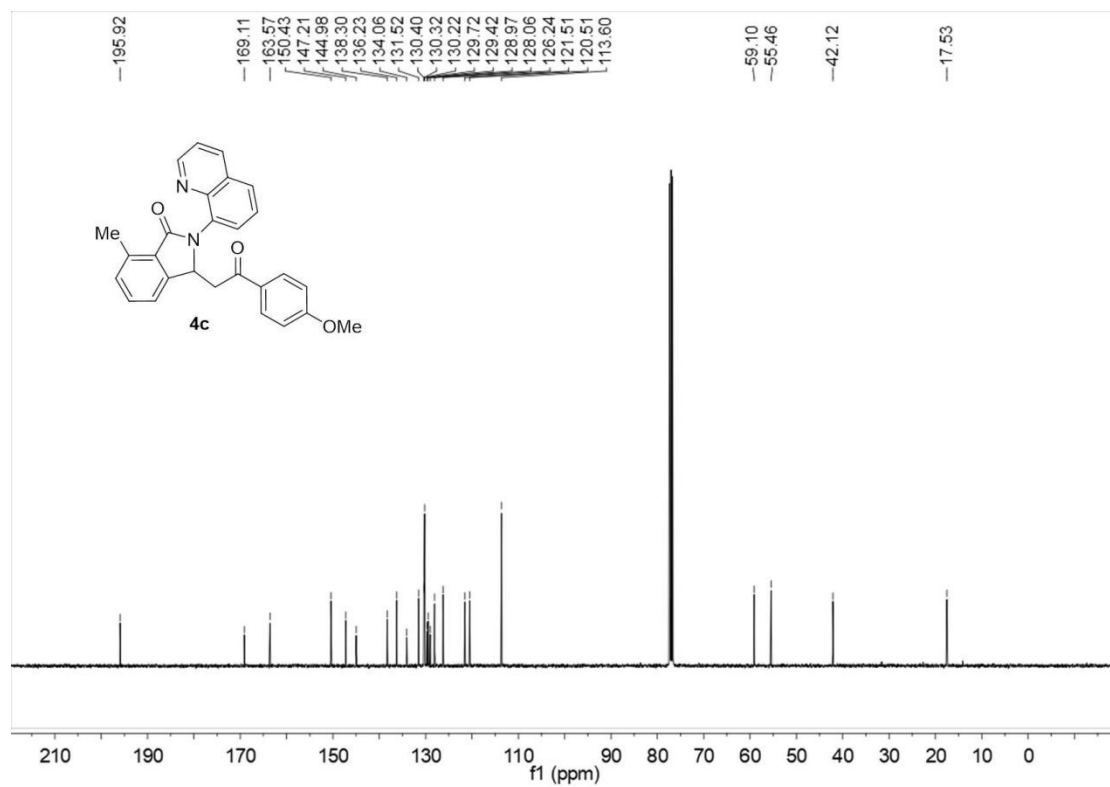

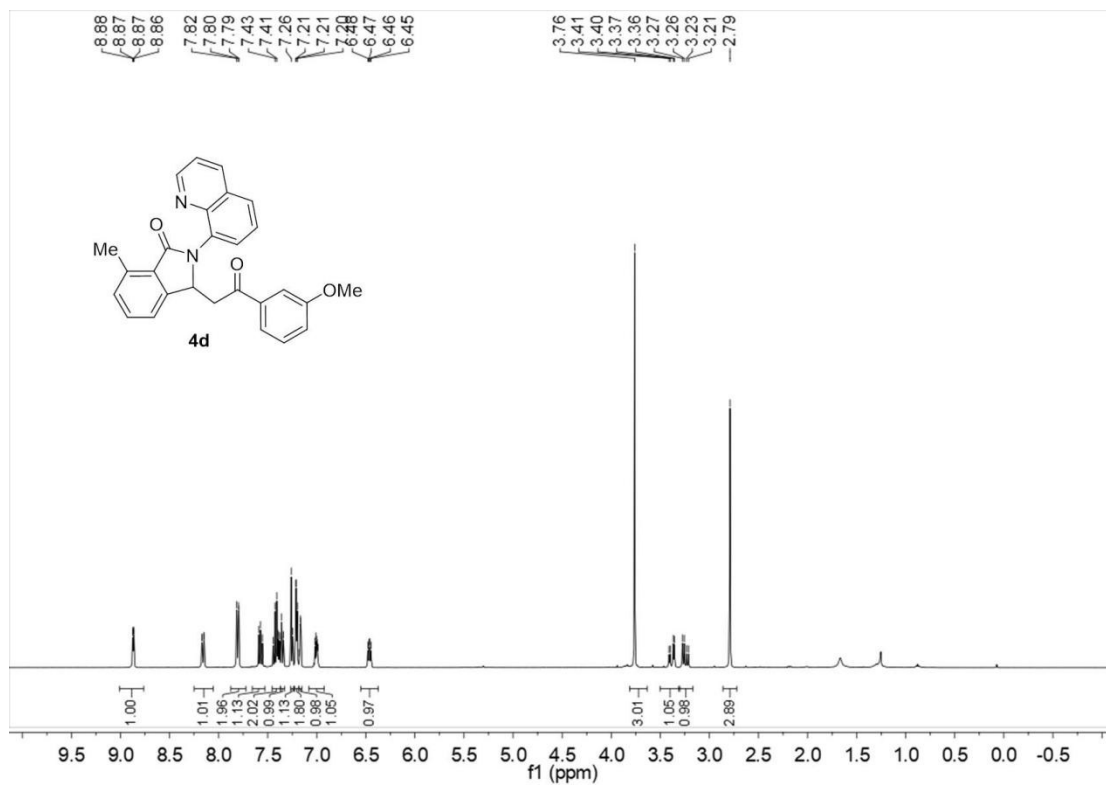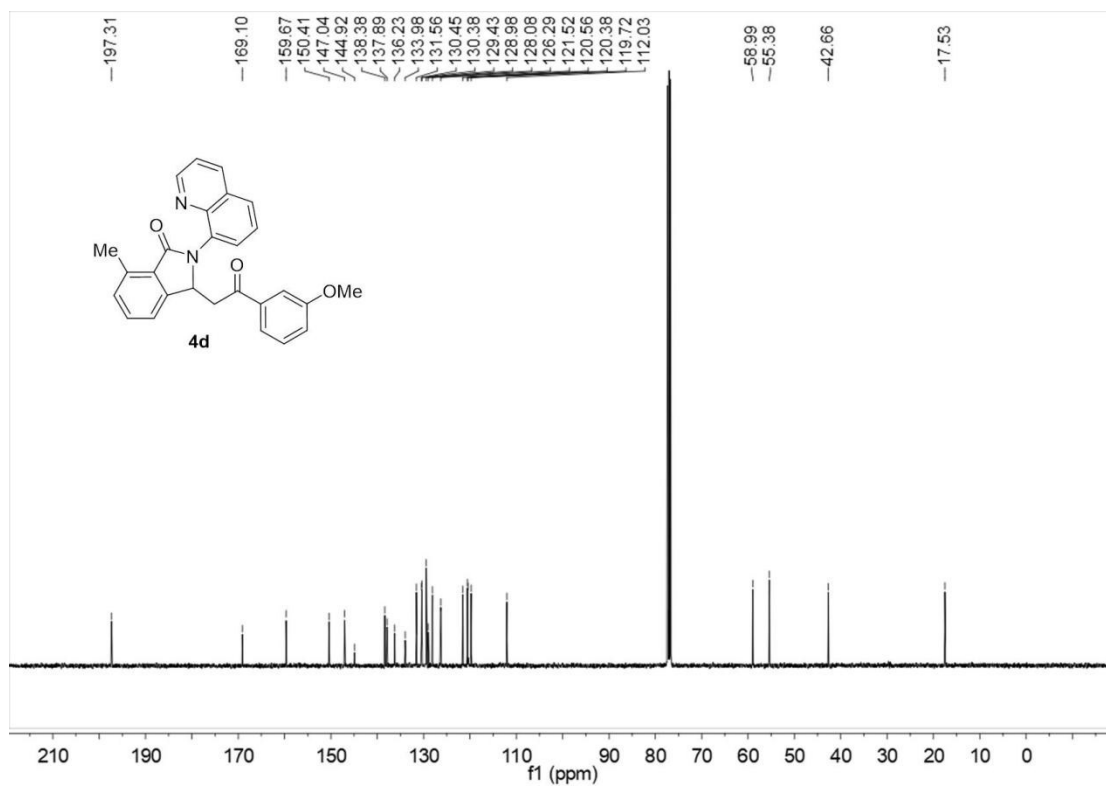

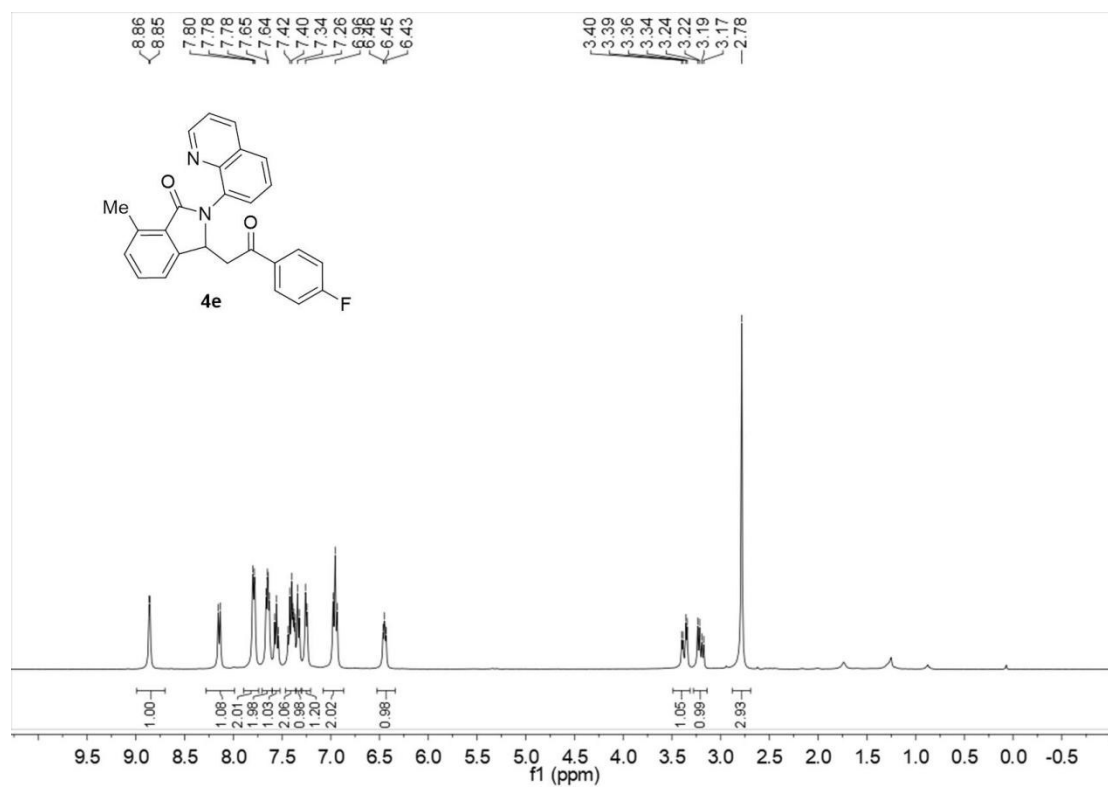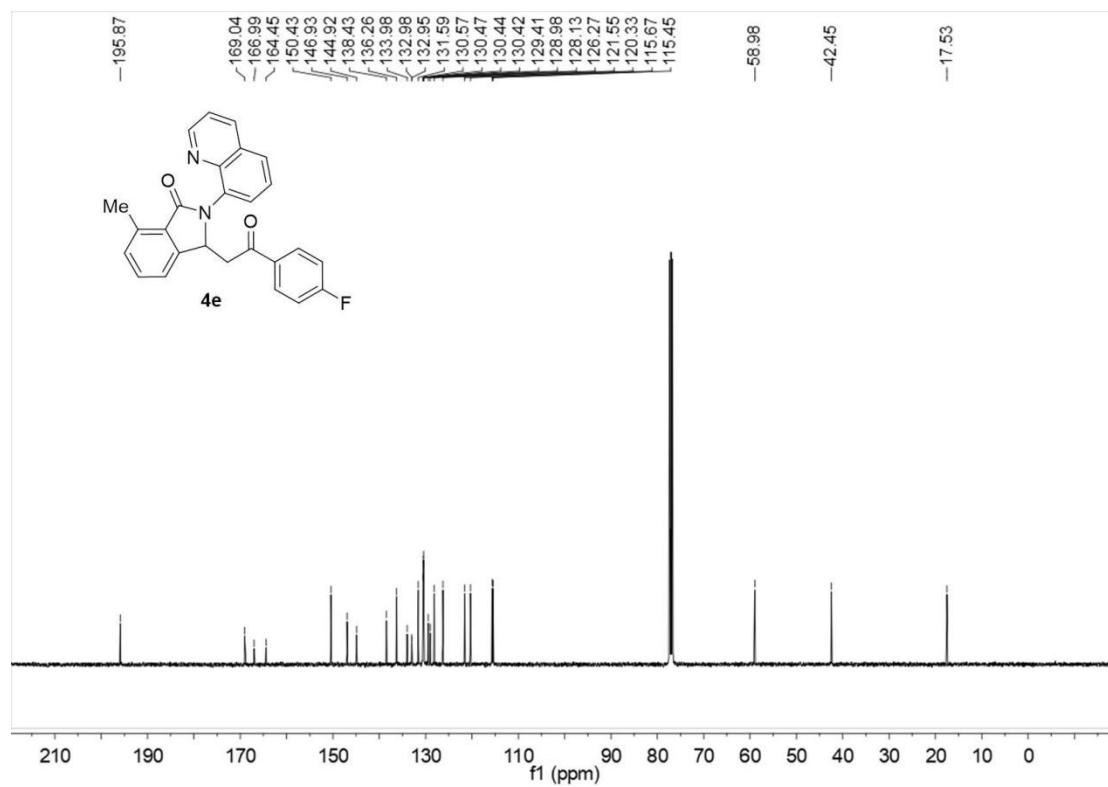

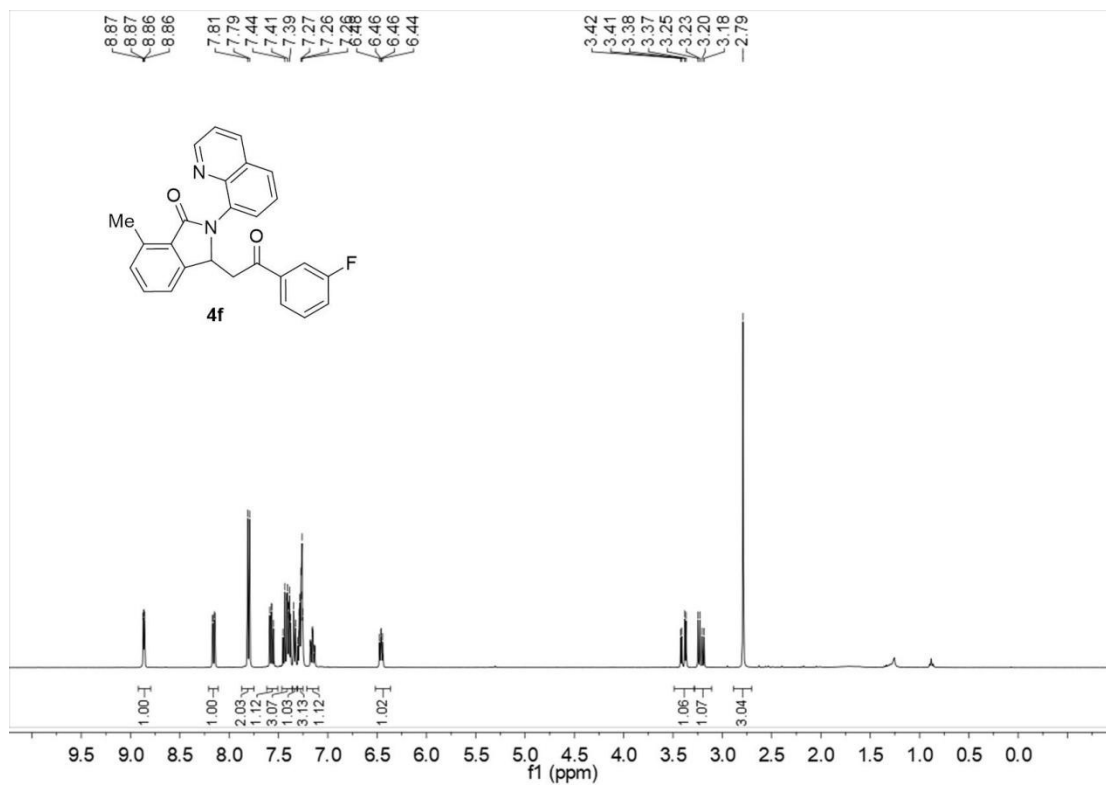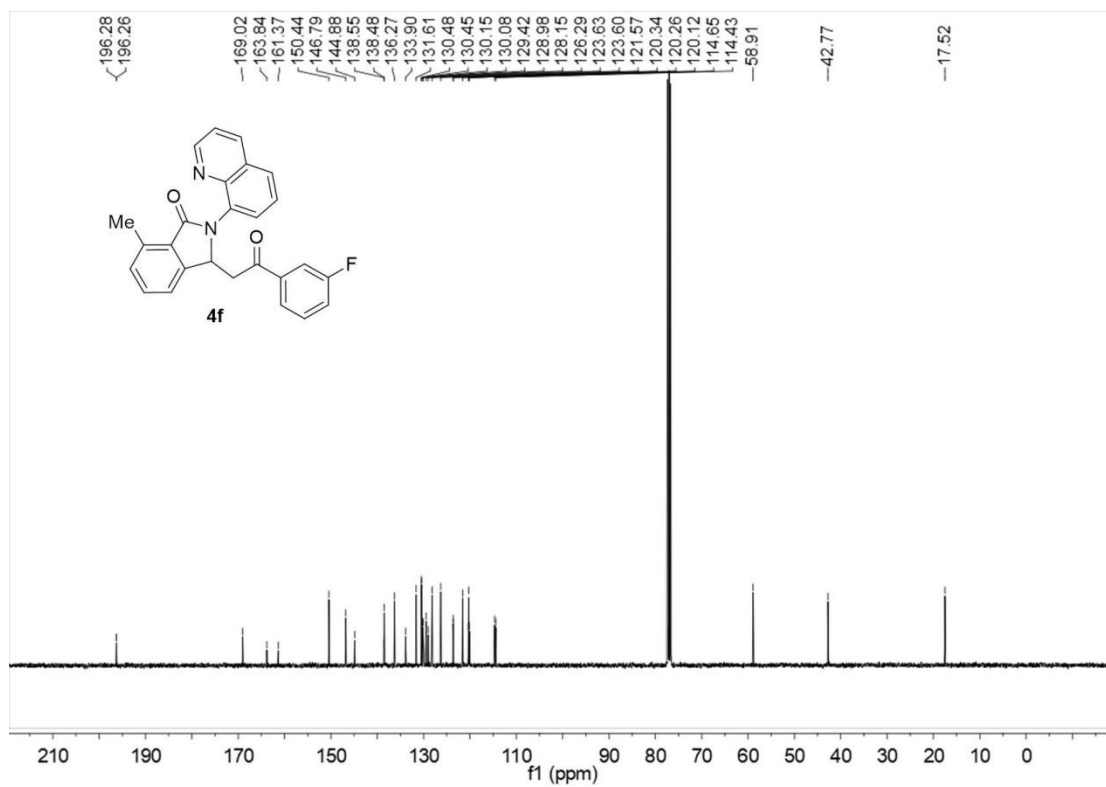



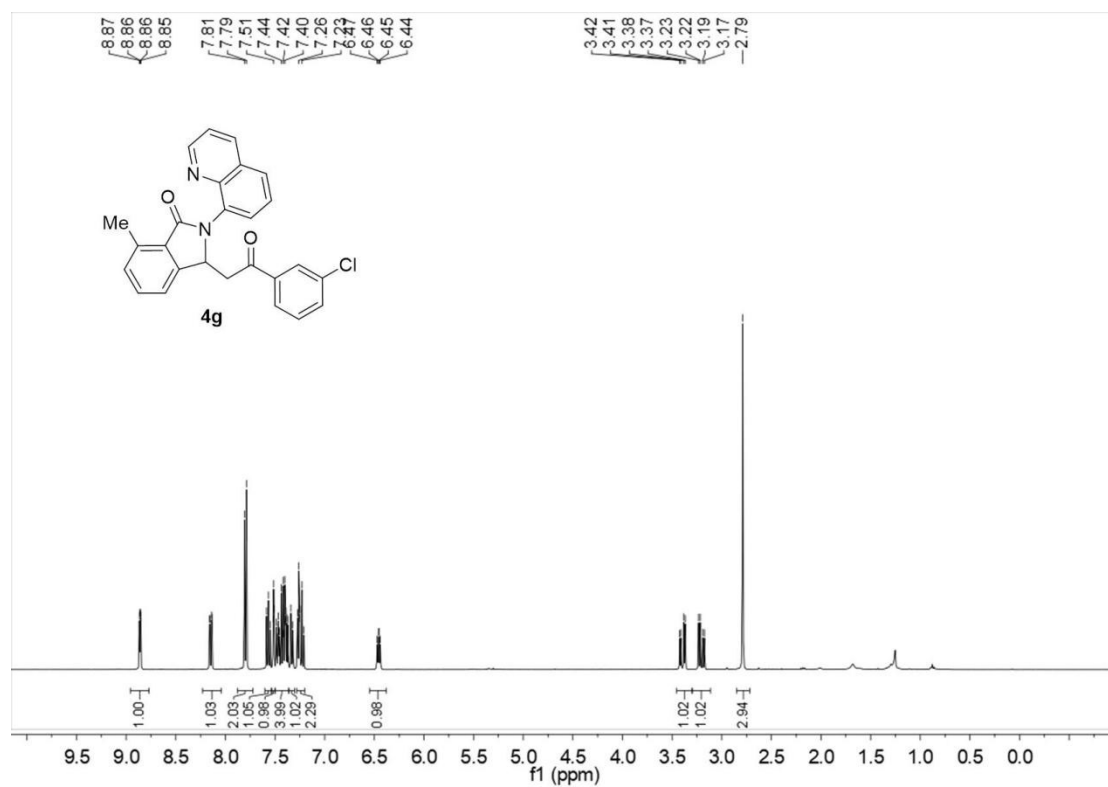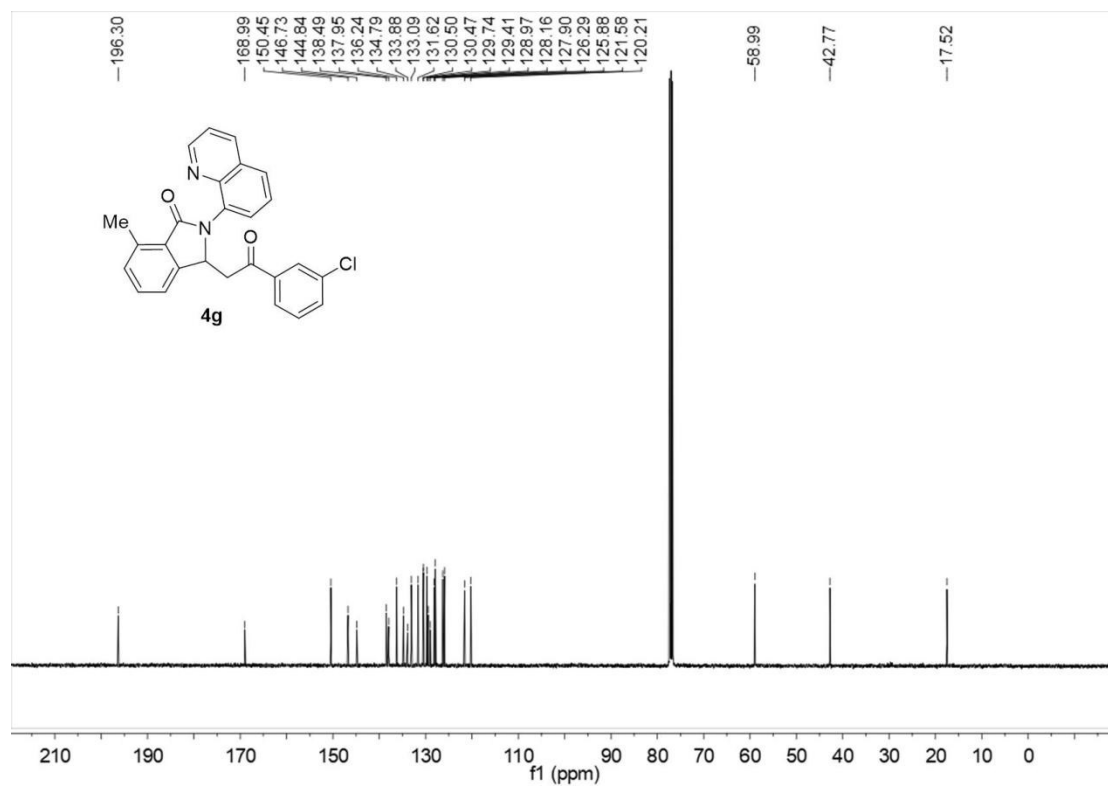

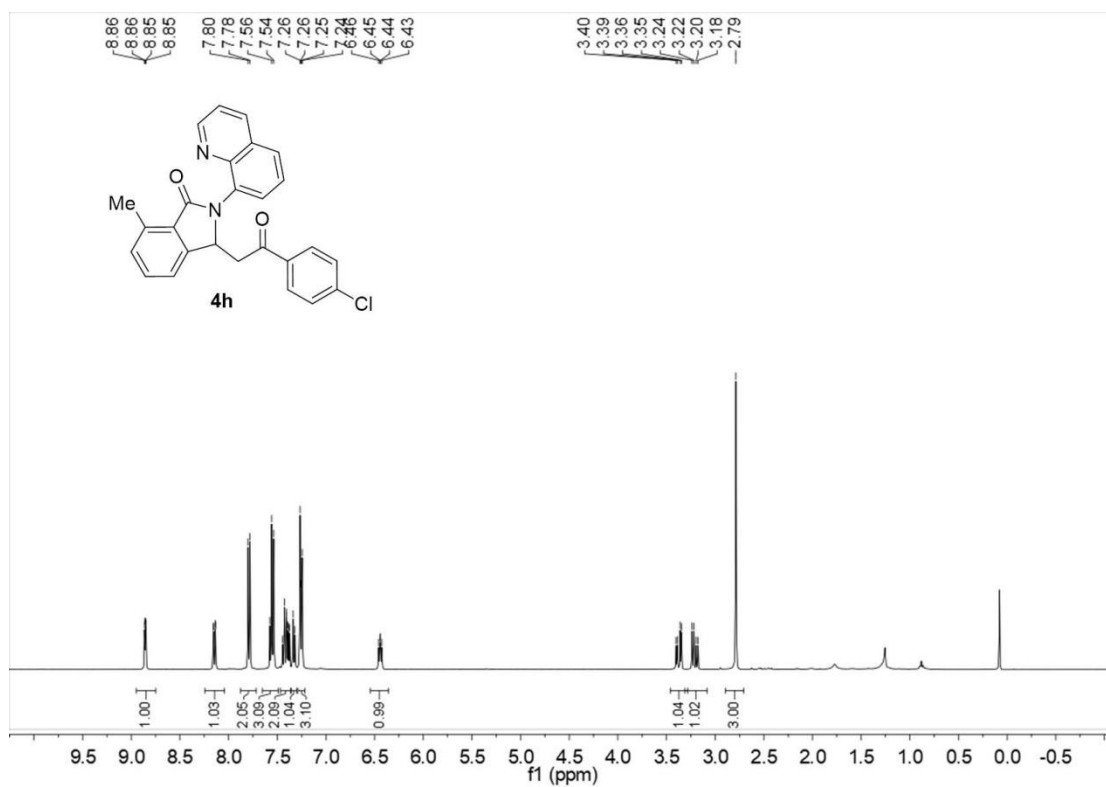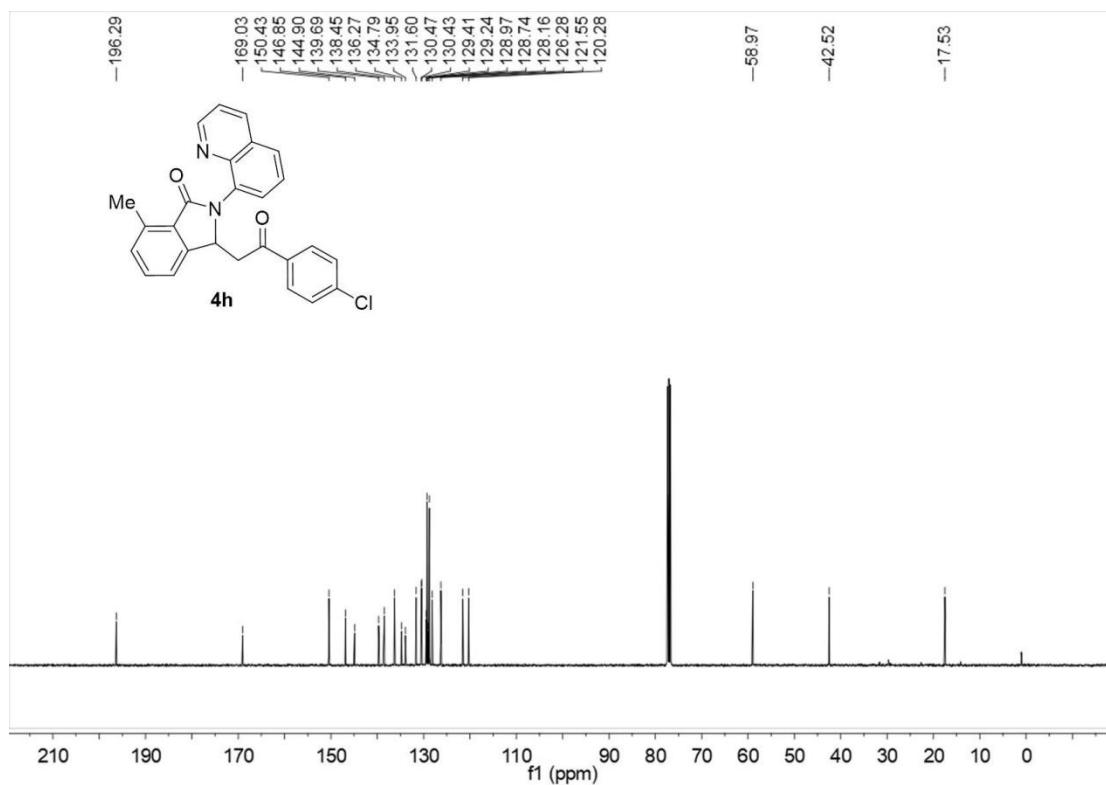

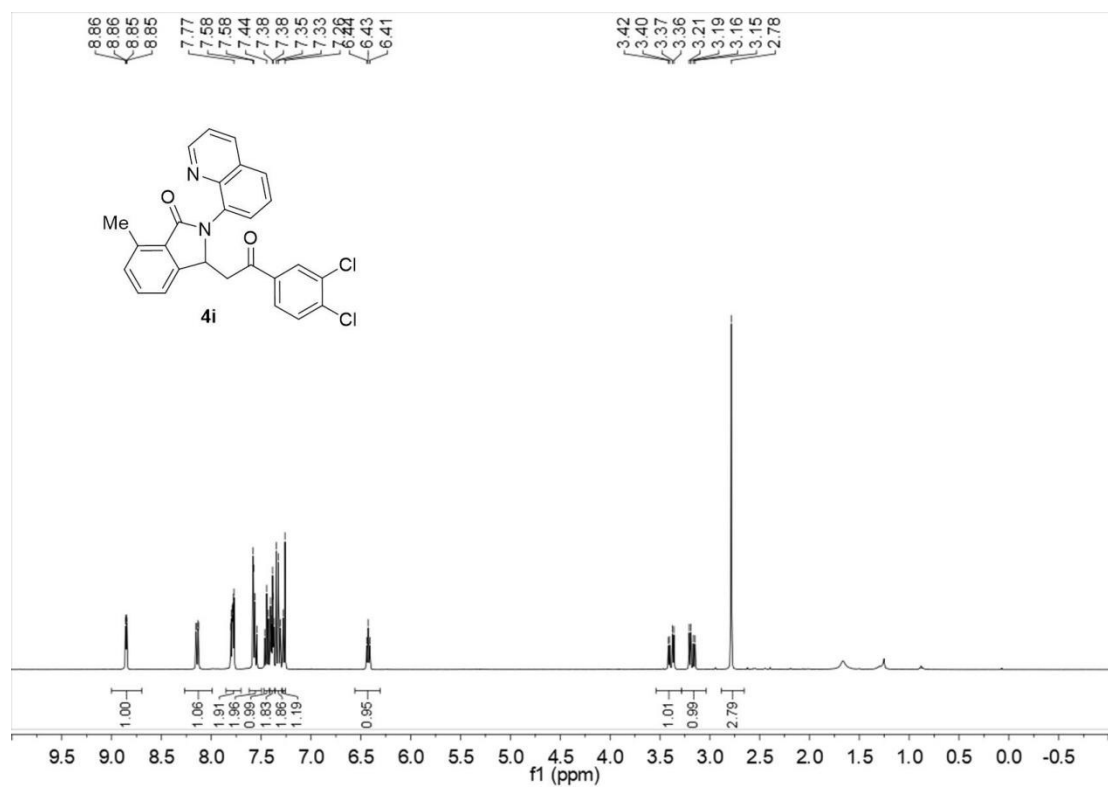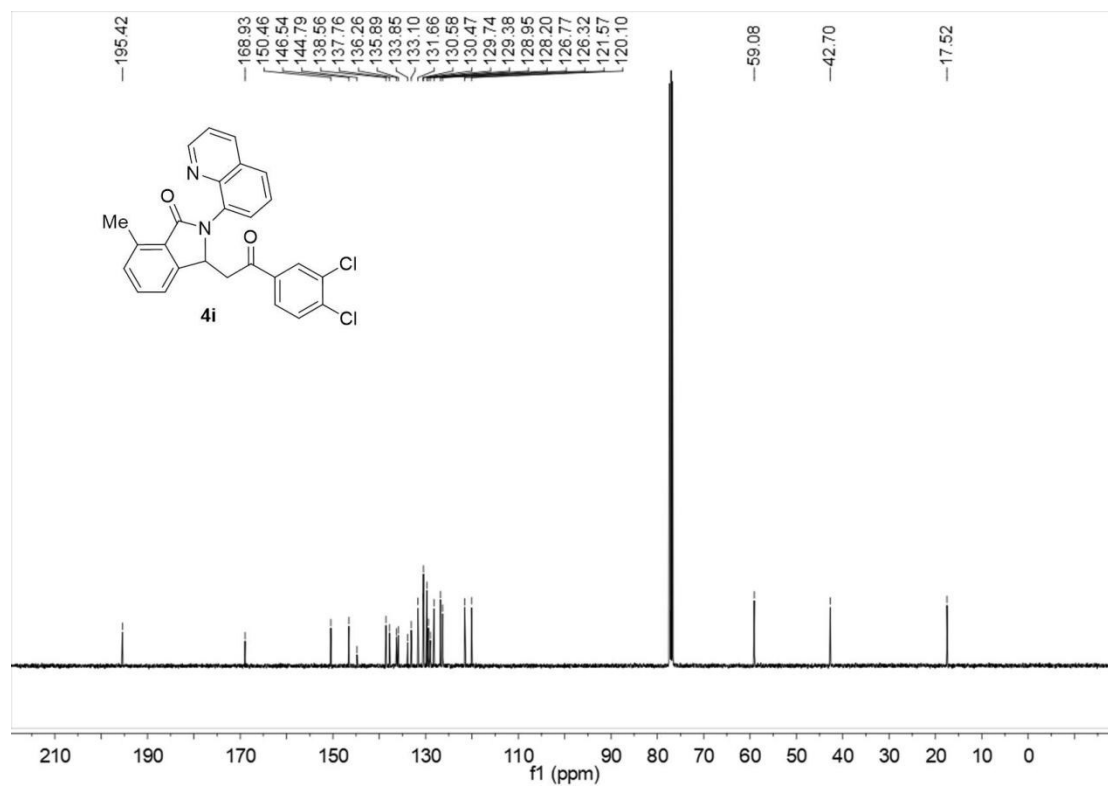

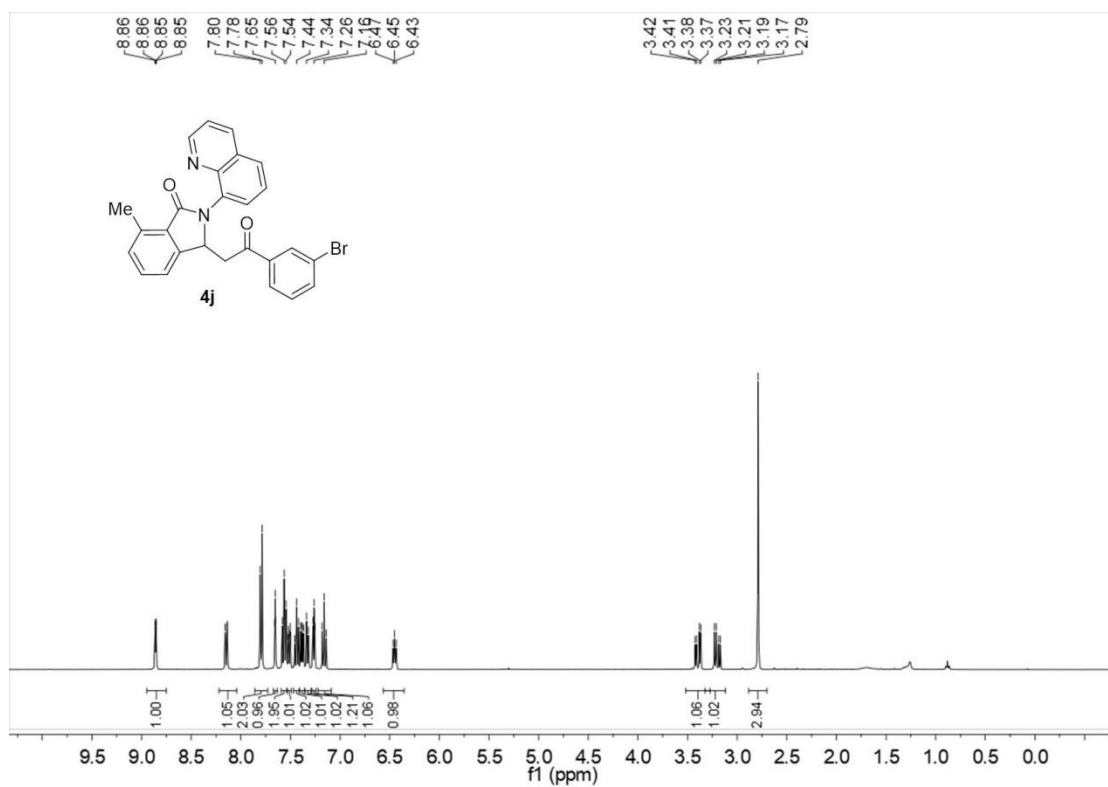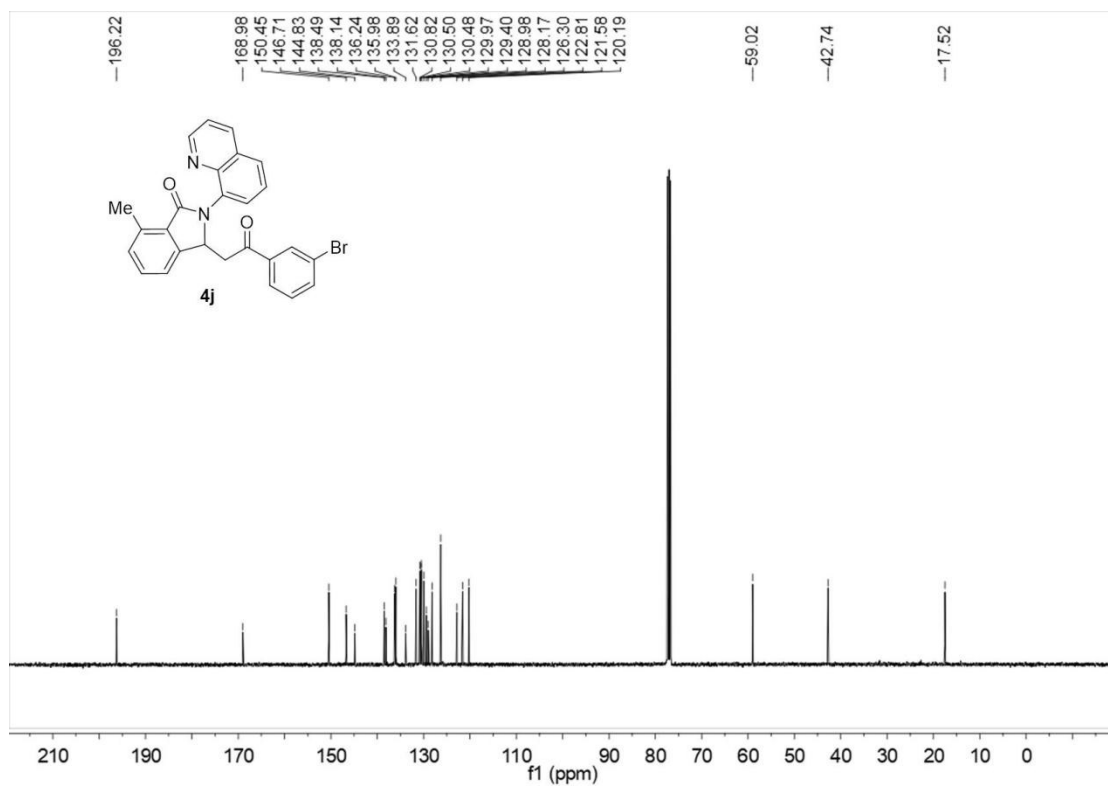

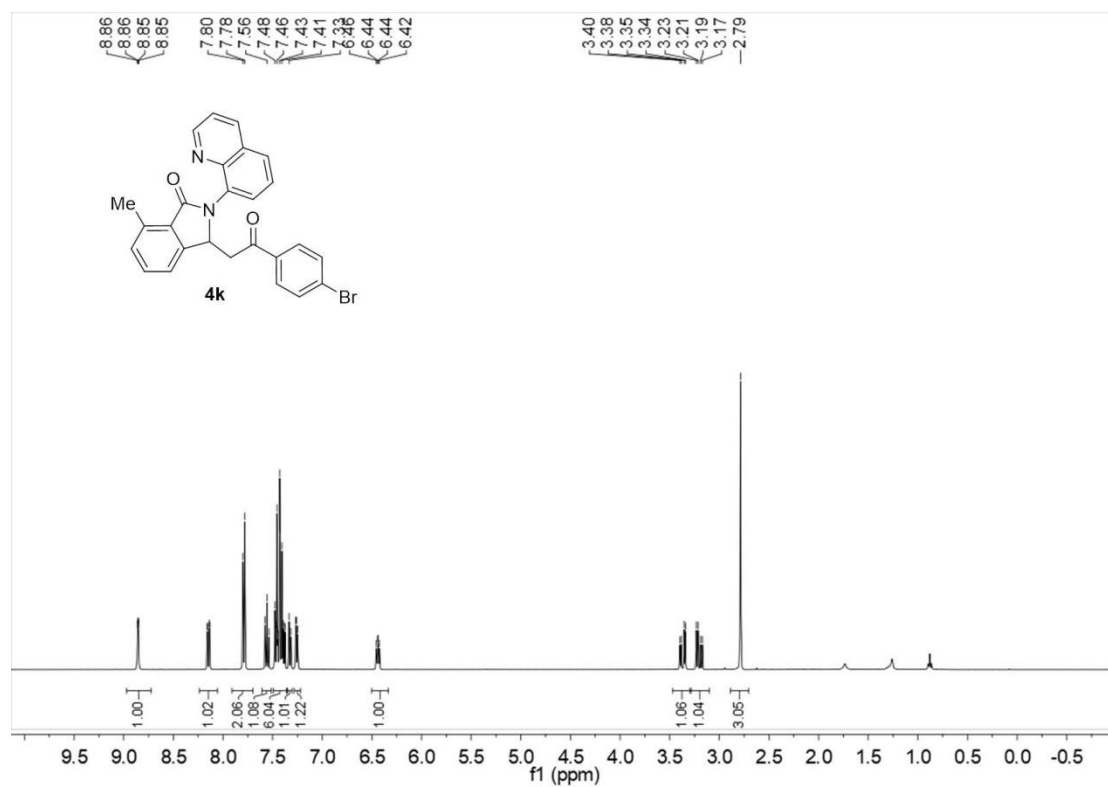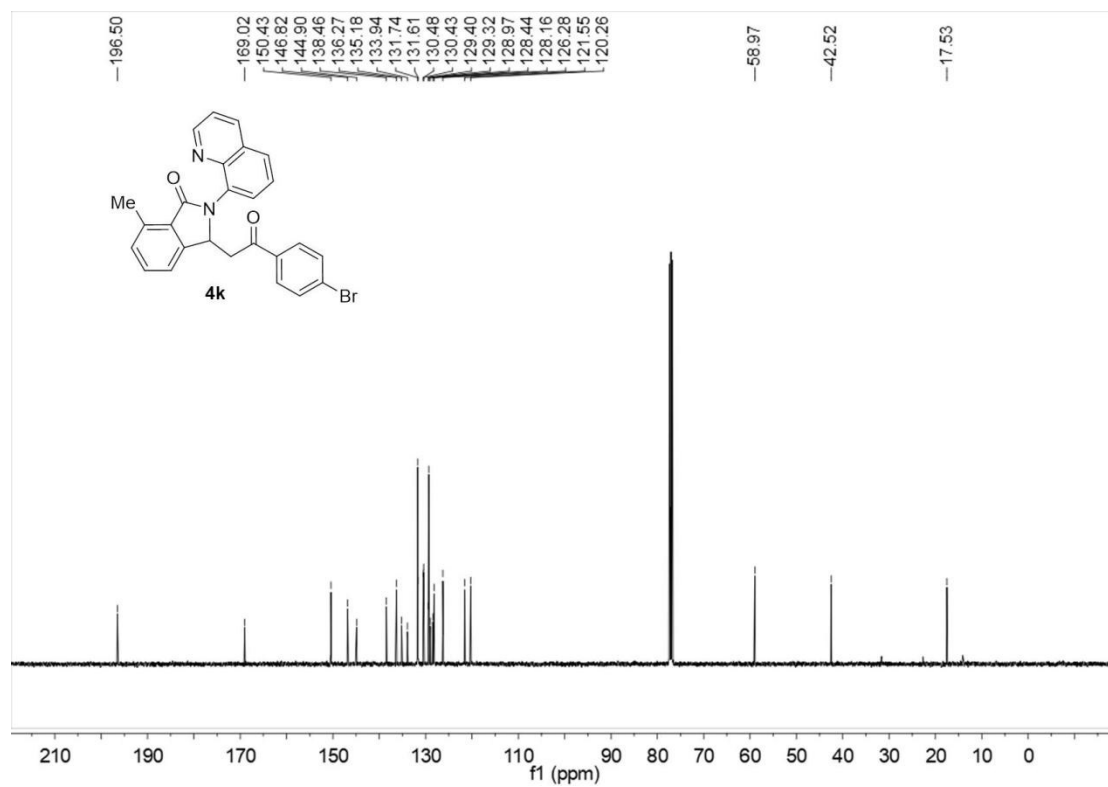

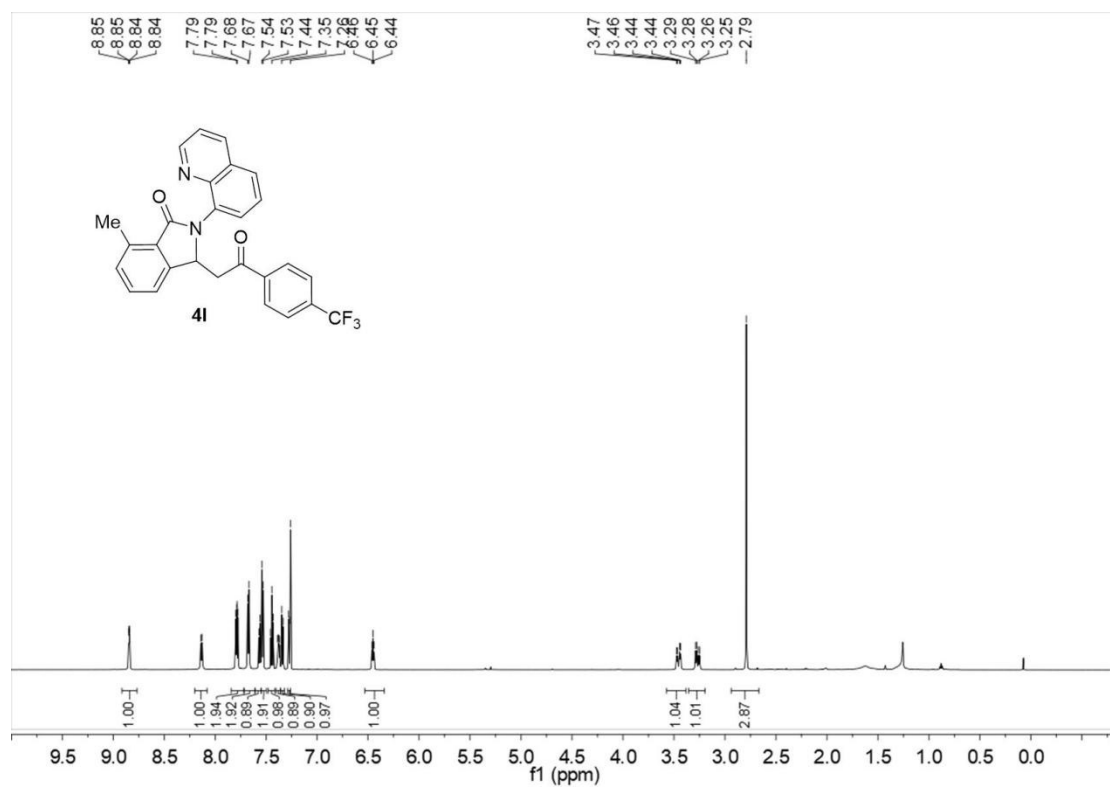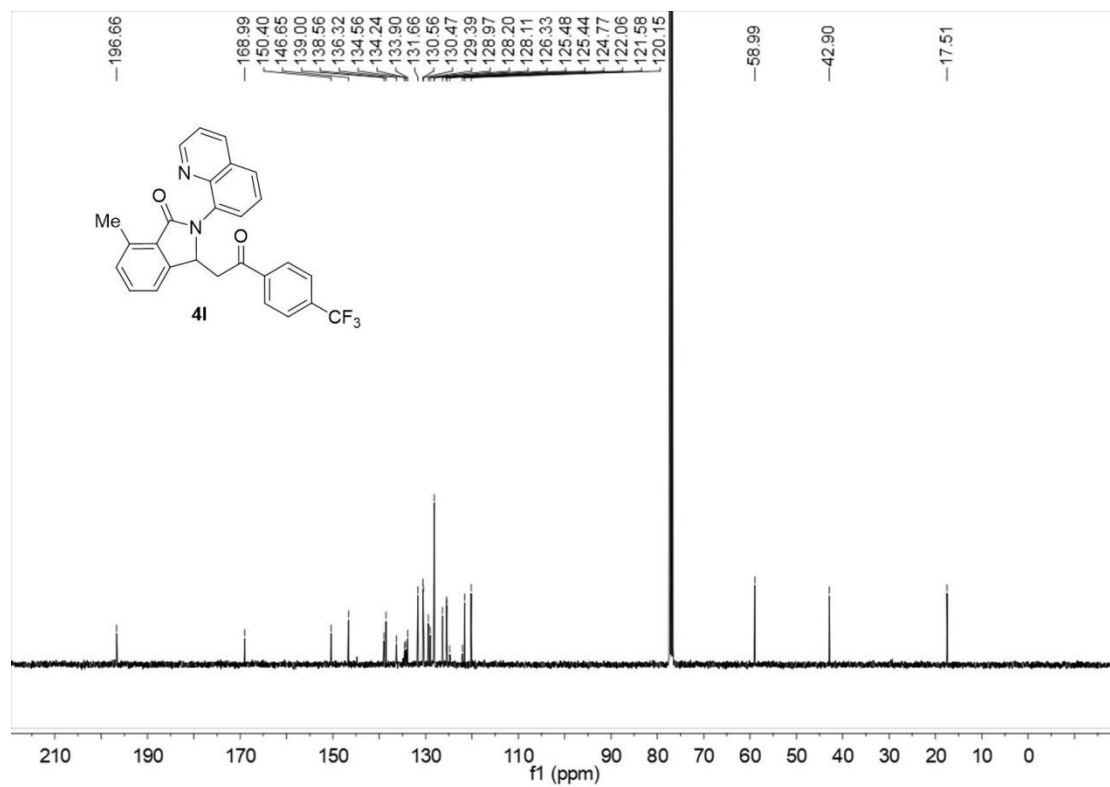

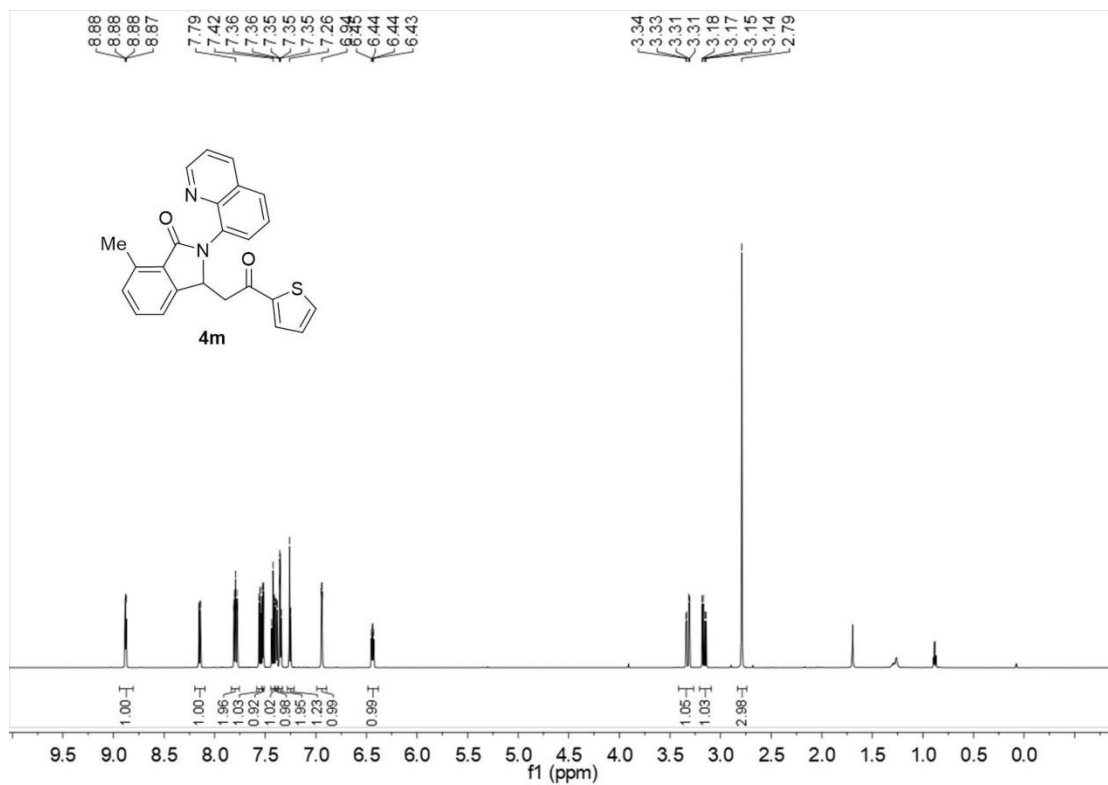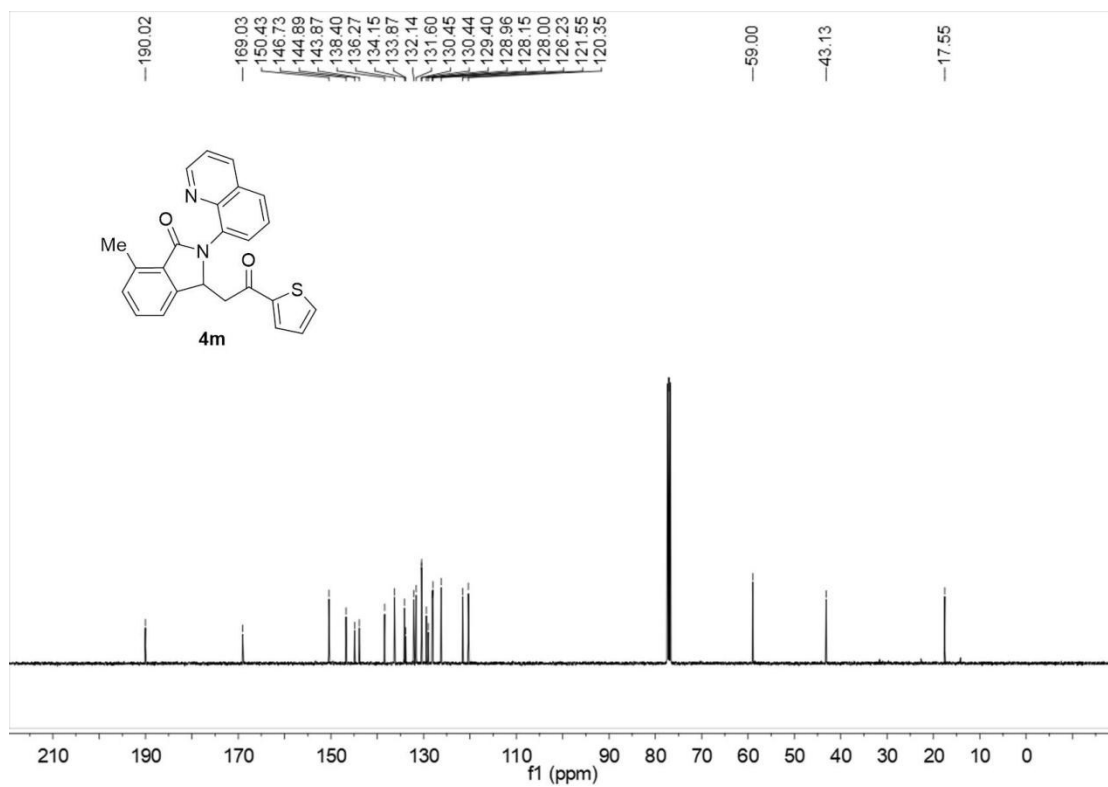

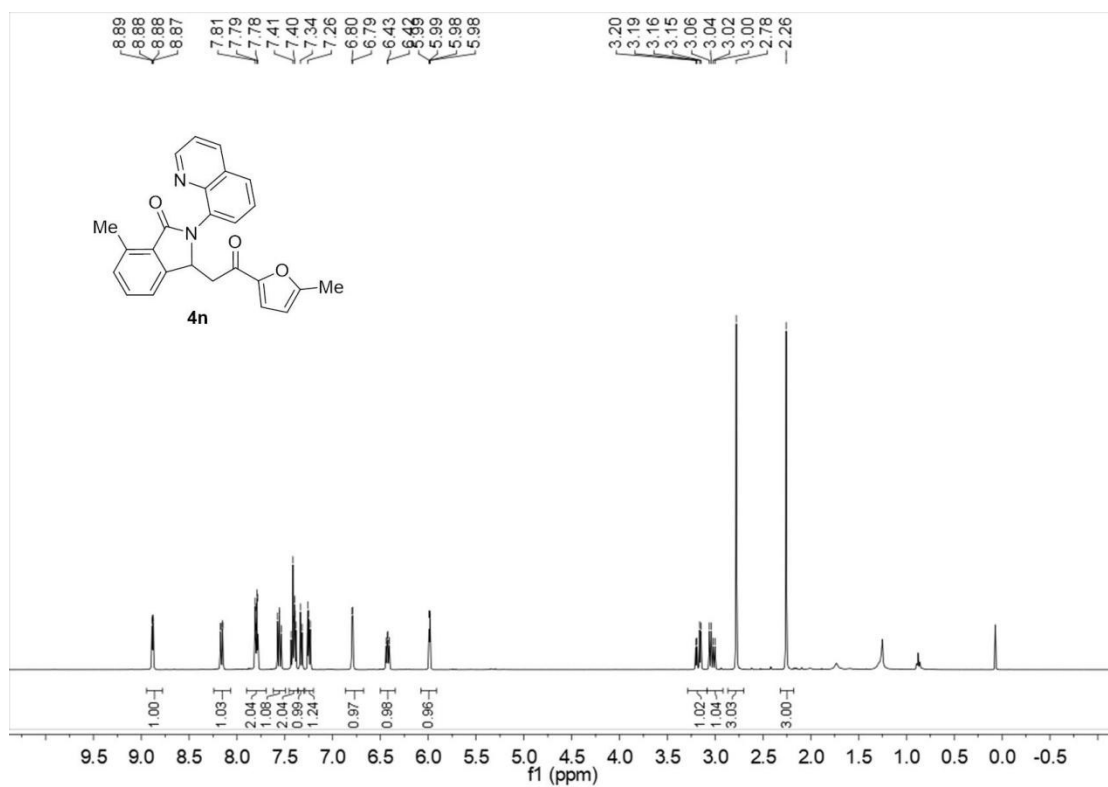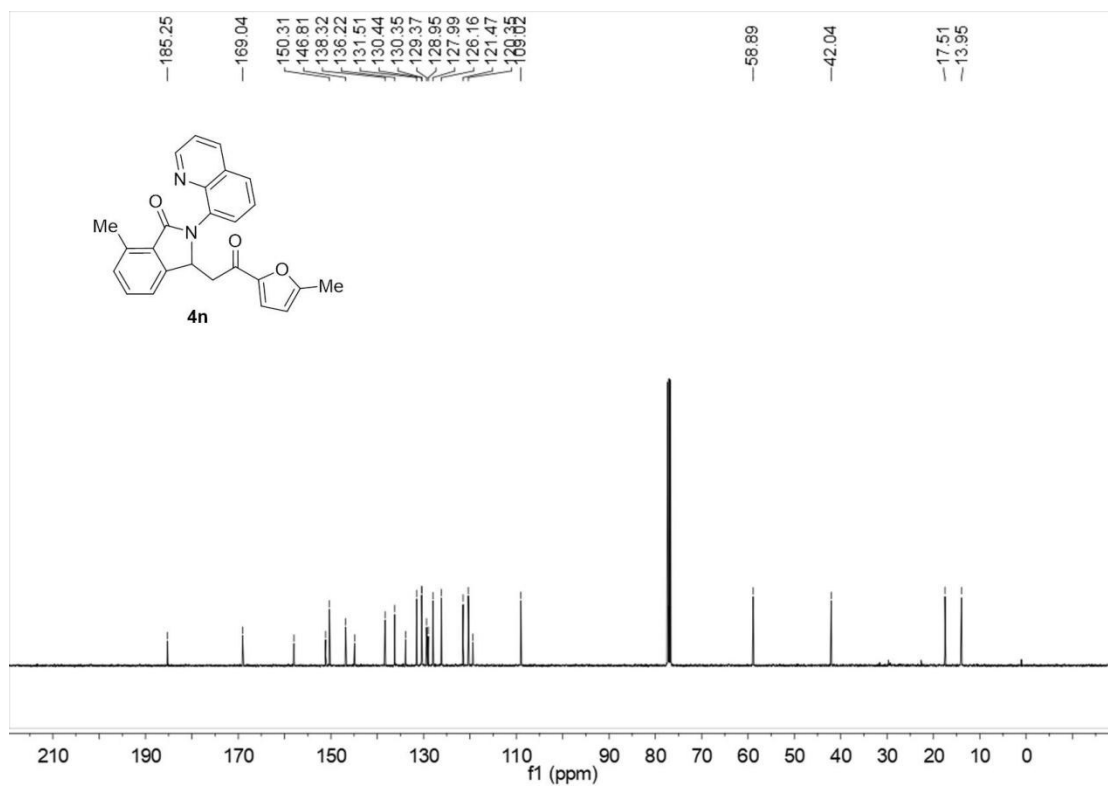



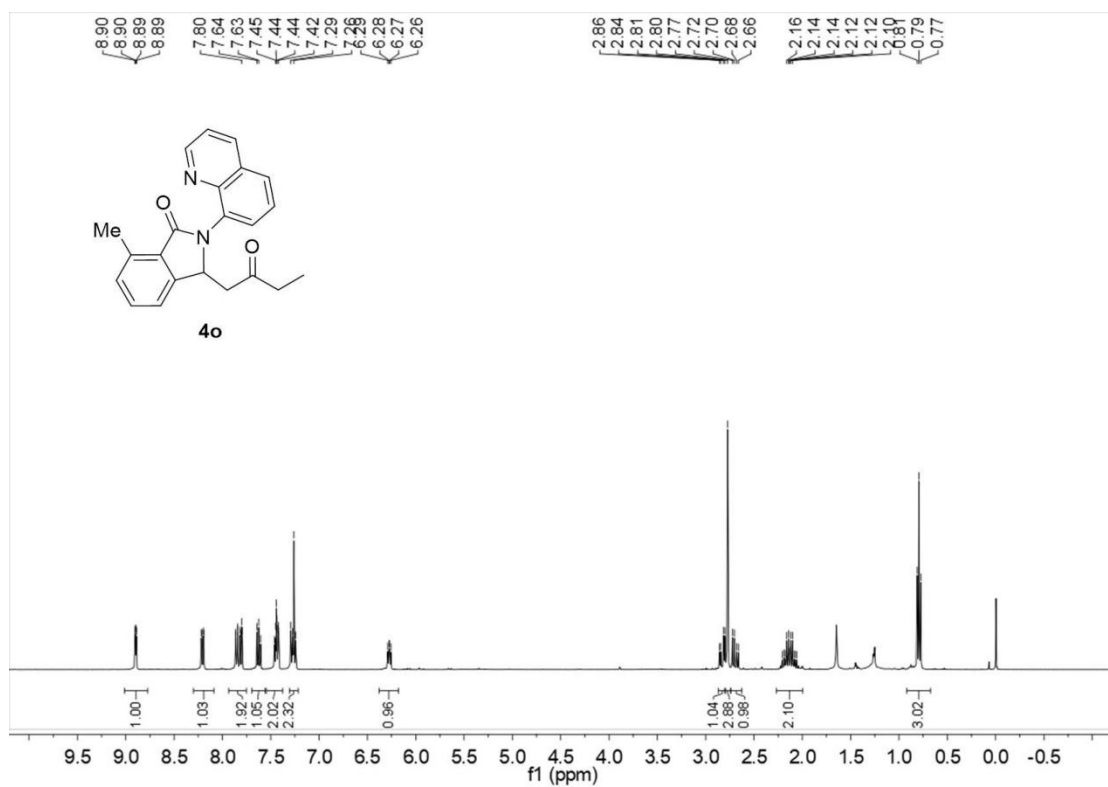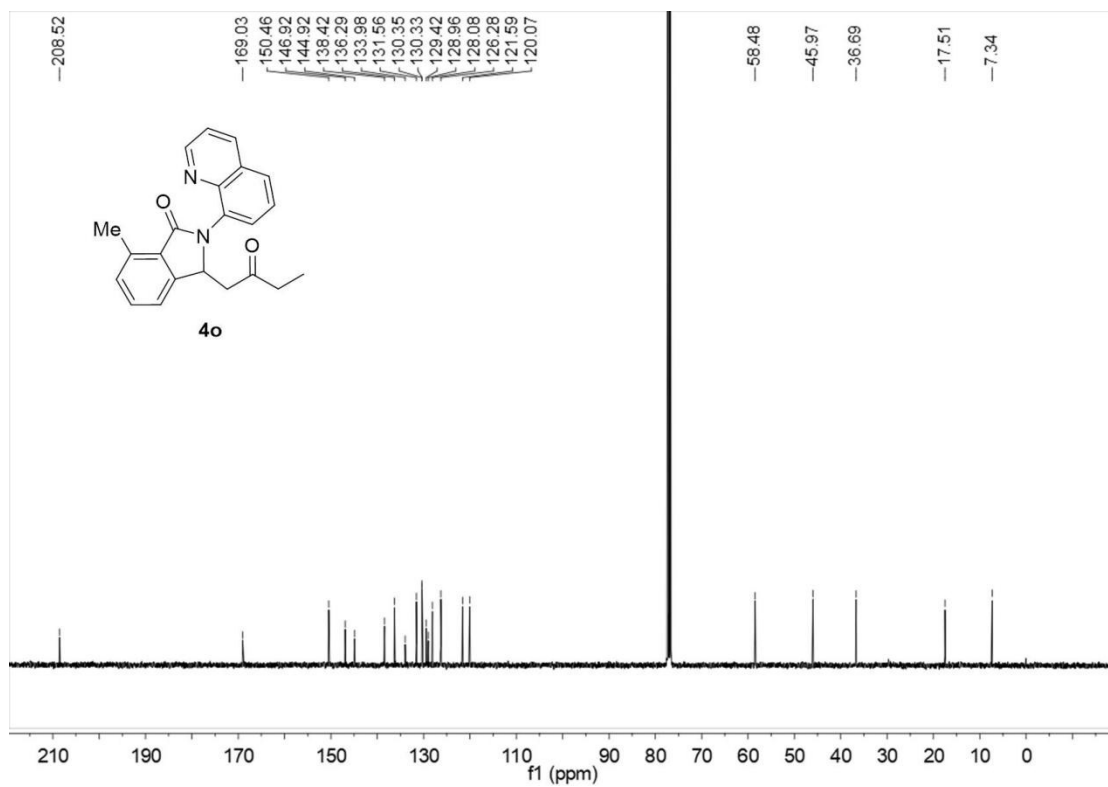

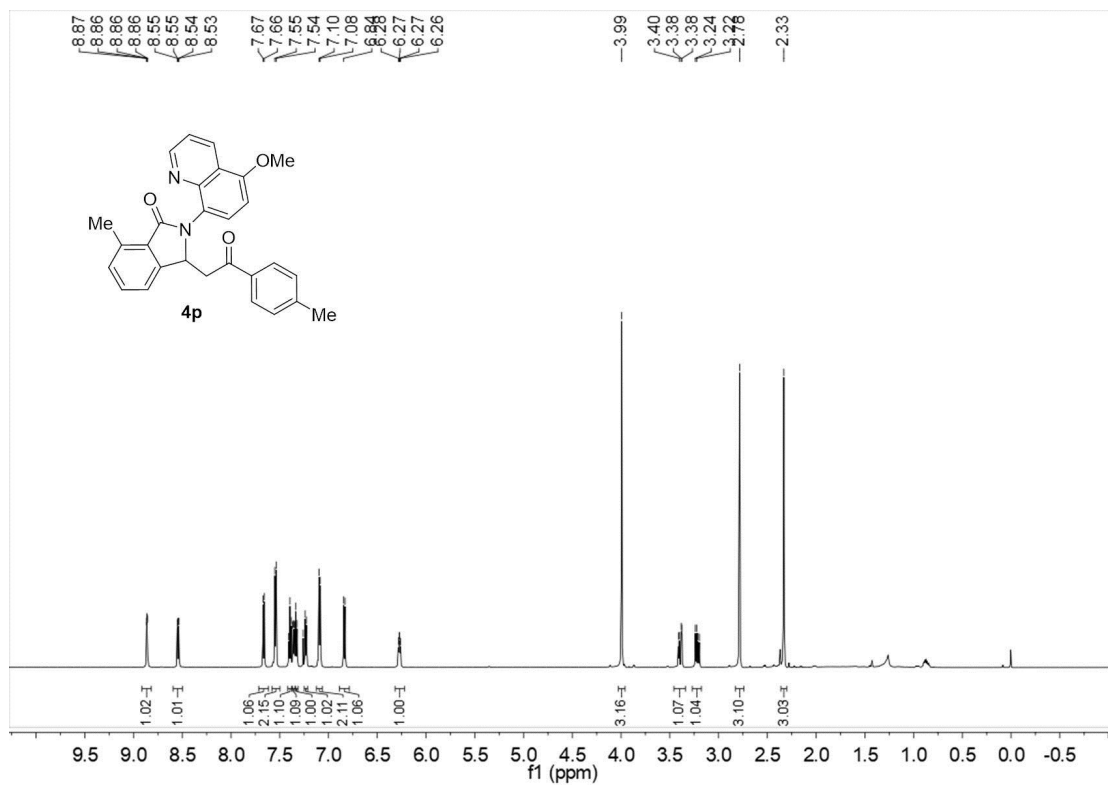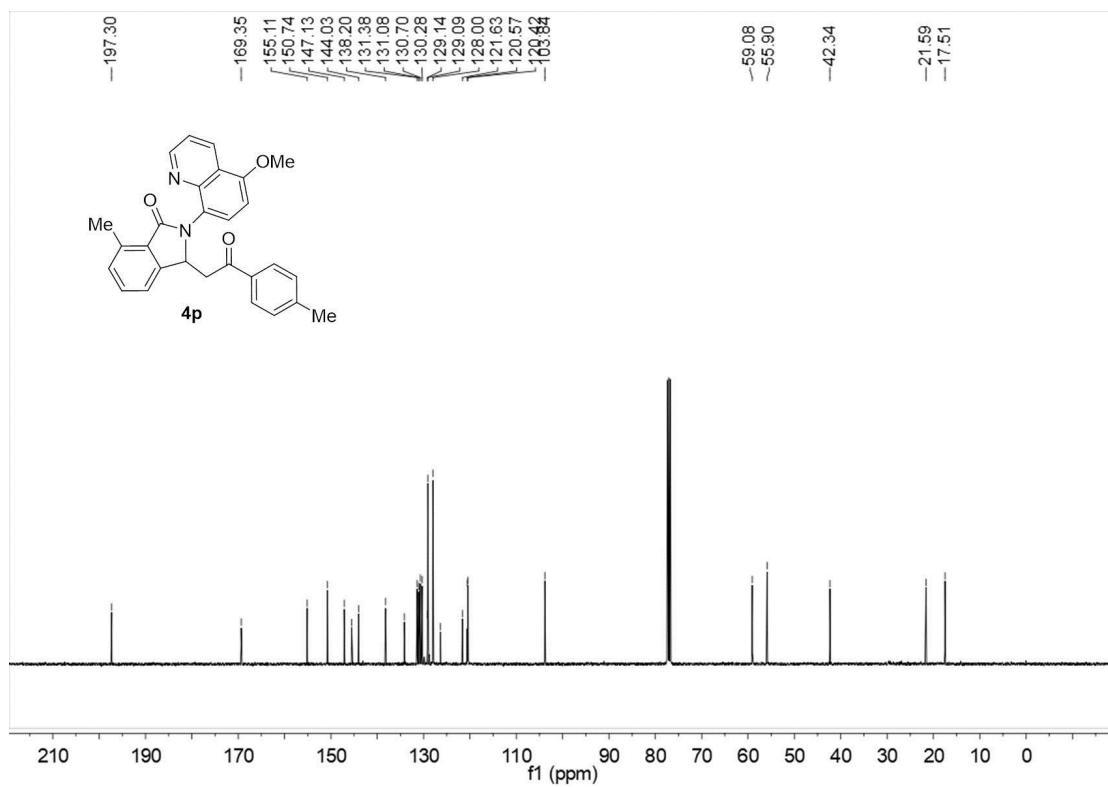

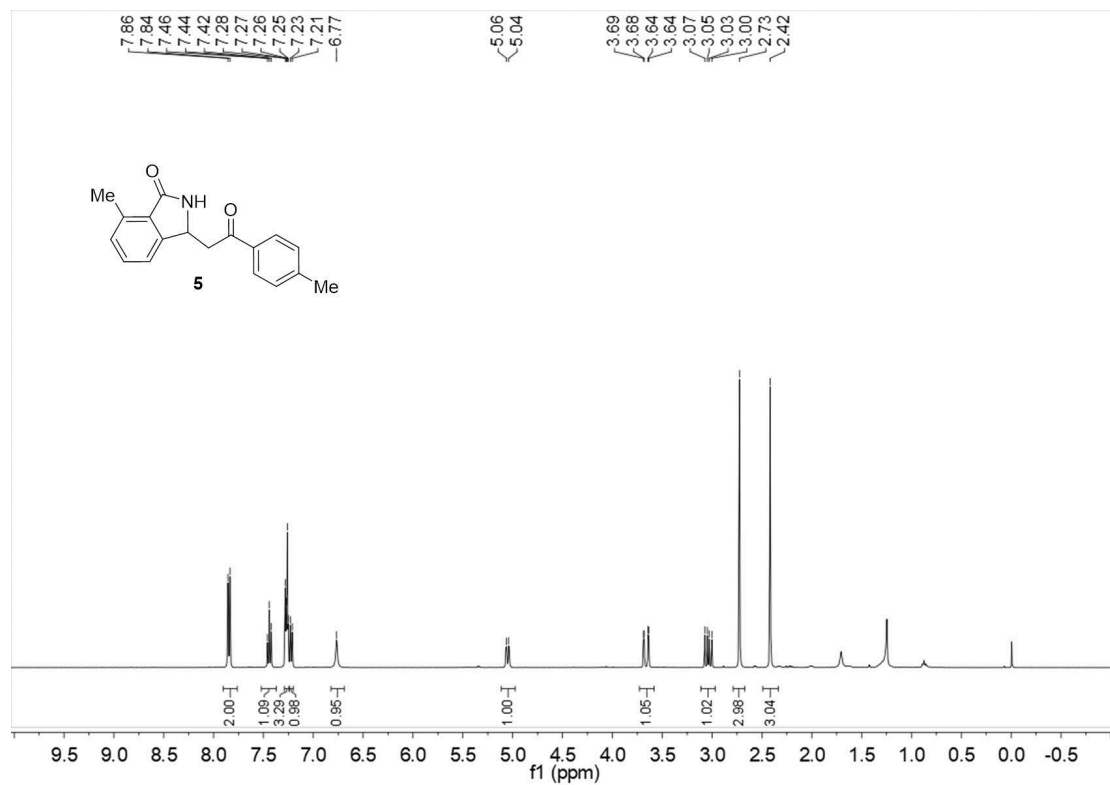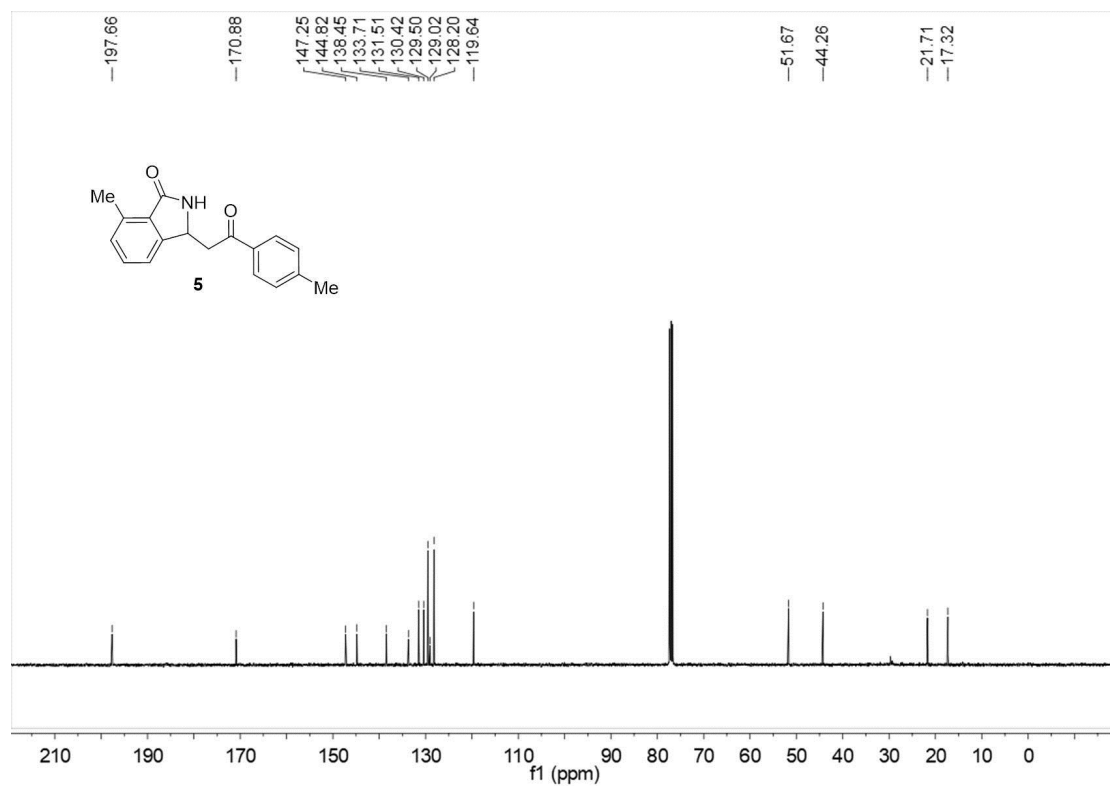

Supplement: c9cc02661d1.pdf [file c9cc02661d1.pdf]
